# Supplementary material for: Outer membrane vesicles from Neisseria gonorrhoeae target PorB to mitochondria and induce apoptosis
Source: PLoS Pathog. 2018 Mar 30;14(3):e1006945. doi: 10.1371/journal.ppat.1006945 (PMC5877877; doi:10.1371/journal.ppat.1006945)
Supplement: S1 Table — N. gonorrhoeae MS11-A OMVs were isolated from culture supernatants (crude) or further purified by gradient ultracentrifugation (pure) and their proteome determined by LC-MS/MS. The complete list shows all identified proteins and their relative abundance. (XLSX) [file ppat.1006945.s007.xlsx]

## Sheet: Pure
entry no.	group probability	Uniprot ID	Accession+D1:D51	Gene	Description	protein probability	percent coverage	num unique peps	tot indep spectra	percent share of spectrum ids	Organism	Other IDs
48	1	D1DKI6	D1DKI6_NEIGO	NGFG_01725	Major outer membrane protein P.IB (PorB)	1	65.7	31	370	34.9	Neisseria gonorrhoeae MS11
14	1	D1DFR9	D1DFR9_NEIGO	NGFG_01357	Outer membrane protein P.III	1	53.8	20	112	10.58	Neisseria gonorrhoeae MS11
18	1	D1DGL7	D1DGL7_NEIGO	groL	60 kDa chaperonin	1	52.8	26	47	4.43	Neisseria gonorrhoeae MS11
63a	1	D1DJI4	D1DJI4_NEIGO	NGFG_02238	Opacity protein	1	18.1	5	30	3.36	Neisseria gonorrhoeae MS11
63b	1	T2A3C9	T2A3C9_NEIGO	NGFG_02258	Opacity protein	1	16.7	3	16	2.23	Neisseria gonorrhoeae MS11
63c	1	T2A392	T2A392_NEIGO	NGFG_02467	Opacity protein	1	25.3	3	4	1.1	Neisseria gonorrhoeae MS11
63d	1	T2A2J6	T2A2J6_NEIGO	NGFG_02432	Opacity protein	0		0	0		Neisseria gonorrhoeae MS11
63e	1	T2A2P2	T2A2P2_NEIGO	NGFG_02483	Opacity protein	0		0	0		Neisseria gonorrhoeae MS11
63f	1	T2A343	T2A343_NEIGO,tr	NGFG_02406	Opacity protein	0		0	0		Neisseria gonorrhoeae MS11	T2A3P8	T2A3P8_NEIGO,tr	T2A460	T2A460_NEIGO
63g	1	T2A3R4	T2A3R4_NEIGO	NGFG_02351	Opacity protein	0		0	0		Neisseria gonorrhoeae MS11
63h	1	T2A3Z8	T2A3Z8_NEIGO	NGFG_02259	Opacity protein	0		0	0		Neisseria gonorrhoeae MS11
63i	1	T2A4E5	T2A4E5_NEIGO	NGFG_02435	Opacity protein	0		0	0		Neisseria gonorrhoeae MS11
52	1	D1DKP9	D1DKP9_NEIGO	NGFG_01788	LysM protein	1	36.6	11	16	1.51	Neisseria gonorrhoeae MS11
22	1	D1DH55	D1DH55_NEIGO	NGFG_00232	Type IV pilus biogenesis and competence protein pilQ	1	27.5	14	15	1.42	Neisseria gonorrhoeae MS11
28	1	D1DI47	D1DI47_NEIGO	NGFG_00574	Uncharacterized protein	1	27.8	10	14	1.31	Neisseria gonorrhoeae MS11
47	1	D1DKH6	D1DKH6_NEIGO	bamA	Outer membrane protein assembly factor BamA	1	16.2	9	13	1.23	Neisseria gonorrhoeae MS11
43	1	D1DK29	D1DK29_NEIGO	NGFG_02106	Uncharacterized protein	1	20.8	7	13	1.22	Neisseria gonorrhoeae MS11
61	1	T2A4H1	T2A4H1_NEIGO	tuf	Elongation factor Tu	1	21.1	8	13	1.22	Neisseria gonorrhoeae MS11
13	1	D1DFD7	D1DFD7_NEIGO	NGFG_01225	Metallopeptidase	1	6.4	5	12	1.13	Neisseria gonorrhoeae MS11
44	1	D1DK86	D1DK86_NEIGO	NGFG_01625	Peptidyl-prolyl cis-trans isomerase SurA	1	24.7	6	11	1.04	Neisseria gonorrhoeae MS11
31	1	D1DIQ9	D1DIQ9_NEIGO	NGFG_00786	Lipoprotein	1	26.7	9	11	1.03	Neisseria gonorrhoeae MS11
30	1	D1DIF6	D1DIF6_NEIGO	NGFG_00683	Lipoprotein NlpD	1	22.1	6	10	0.94	Neisseria gonorrhoeae MS11
19	1	D1DGR2	D1DGR2_NEIGO	NGFG_00089	Soluble lytic murein transglycosylase	1	7.8	5	9	0.85	Neisseria gonorrhoeae MS11
20	1	D1DGR6	D1DGR6_NEIGO	NGFG_00093	Lipoprotein(nlPA family)	1	24.7	7	9	0.84	Neisseria gonorrhoeae MS11
29	1	D1DIE8	D1DIE8_NEIGO	NGFG_00675	Lipoprotein	1	31.7	4	8	0.76	Neisseria gonorrhoeae MS11
56	1	D1DL15	D1DL15_NEIGO	NGFG_01901	Phospholipid-binding protein	1	51.5	8	8	0.75	Neisseria gonorrhoeae MS11
16	1	D1DG44	D1DG44_NEIGO	NGFG_01482	Thiol:disulfide interchange protein DsbC	1	5.4	2	7	0.66	Neisseria gonorrhoeae MS11
34	1	D1DIZ2	D1DIZ2_NEIGO	NGFG_00869	Uncharacterized protein	1	31.3	3	7	0.66	Neisseria gonorrhoeae MS11
15	1	D1DFZ1	D1DFZ1_NEIGO	NGFG_01429	N-acetylmuramoyl-L-alanine amidase AmiC	1	5.3	3	6	0.56	Neisseria gonorrhoeae MS11
57	1	D1DL24	D1DL24_NEIGO	rpsB	30S ribosomal protein S2	1	11.6	3	5	0.47	Neisseria gonorrhoeae MS11
12	1	D1DFD6	D1DFD6_NEIGO	NGFG_01224	C-terminal processing peptidase	1	7.3	3	4	0.38	Neisseria gonorrhoeae MS11
23	1	D1DHH6	D1DHH6_NEIGO	NGFG_00353	Major ferric iron-binding protein	1	13.6	3	4	0.38	Neisseria gonorrhoeae MS11
27	1	D1DI40	D1DI40_NEIGO	NGFG_00567	Uncharacterized protein	1	8.6	3	4	0.38	Neisseria gonorrhoeae MS11
37	1	D1DJI9	D1DJI9_NEIGO	NGFG_02217	Adhesin mafA	1	9.1	3	4	0.38	Neisseria gonorrhoeae MS11
71	0.986	D1DGB8	D1DGB8_NEIGO	NGFG_01556	NodT family efflux transporter, outer membrane factor (OMF) lipoprotein	0.986	2.1	1	4	0.38	Neisseria gonorrhoeae MS11
75	0.9851	D1DFZ7	D1DFZ7_NEIGO	NGFG_01435	Putrescine-binding periplasmic protein	0.9851	2.4	1	4	0.38	Neisseria gonorrhoeae MS11
83	0.9823	D1DHN4	D1DHN4_NEIGO	NGFG_00411	Uncharacterized protein	0.9823	5.3	1	4	0.38	Neisseria gonorrhoeae MS11
25	1	D1DHP1	D1DHP1_NEIGO	bamD	Outer membrane protein assembly factor BamD	1	20.3	4	4	0.37	Neisseria gonorrhoeae MS11
46	1	D1DKF2	D1DKF2_NEIGO	bamE	Outer membrane protein assembly factor BamE	1	30.4	3	4	0.37	Neisseria gonorrhoeae MS11
9	1	D1DFB4	D1DFB4_NEIGO	NGFG_01202	Type IV pilus biogenesis/stability protein PilW( PilF)	1	15.8	3	3	0.28	Neisseria gonorrhoeae MS11
38	1	D1DJK4	D1DJK4_NEIGO	NGFG_02152	Muramoyltetrapeptide carboxypeptidase	1	6.1	2	3	0.28	Neisseria gonorrhoeae MS11
40	1	D1DJP0	D1DJP0_NEIGO,tr	NGFG_02194	Adhesin mafA 2/3	1	6.1	2	3	0.28	Neisseria gonorrhoeae MS11
45	1	D1DK87	D1DK87_NEIGO	lptD	LPS-assembly protein LptD	1	4.5	3	3	0.28	Neisseria gonorrhoeae MS11
54	1	D1DKU2	D1DKU2_NEIGO	NGFG_01828	Uncharacterized protein	1	4.9	2	3	0.28	Neisseria gonorrhoeae MS11
93	0.9786	D1DFW3	D1DFW3_NEIGO	ftsZ	Cell division protein FtsZ	0.9786	3.1	1	3	0.28	Neisseria gonorrhoeae MS11
8	1	D1DF85	D1DF85_NEIGO	NGFG_01173	Lytic murein transglycosylase B	1	4.4	2	2	0.19	Neisseria gonorrhoeae MS11
10	1	D1DFC7	D1DFC7_NEIGO	rpsF	30S ribosomal protein S6	1	12.3	2	2	0.19	Neisseria gonorrhoeae MS11
11	1	D1DFD4	D1DFD4_NEIGO	NGFG_01222	Carbonic anhydrase	1	13.5	2	2	0.19	Neisseria gonorrhoeae MS11
17	1	D1DG52	D1DG52_NEIGO	dnaK	Chaperone protein DnaK	1	2.8	2	2	0.19	Neisseria gonorrhoeae MS11
21	1	D1DH12	D1DH12_NEIGO	NGFG_00189	Chromosome partitioning ATPase	1	6.1	2	2	0.19	Neisseria gonorrhoeae MS11
24	1	D1DHJ2	D1DHJ2_NEIGO	NGFG_00369	Opacity protein	1	24	2	2	0.19	Neisseria gonorrhoeae MS11
26	1	D1DHW3	D1DHW3_NEIGO	NGFG_00490	Cysteine synthase	1	9	2	2	0.19	Neisseria gonorrhoeae MS11
32	1	D1DIU2	D1DIU2_NEIGO	sucC	Succinyl-CoA ligase [ADP-forming] subunit beta	1	5.2	2	2	0.19	Neisseria gonorrhoeae MS11
33	1	D1DIV2	D1DIV2_NEIGO	aroA	3-phosphoshikimate 1-carboxyvinyltransferase	1	3.5	2	2	0.19	Neisseria gonorrhoeae MS11
35	1	D1DJ21	D1DJ21_NEIGO	hscA	Chaperone protein HscA homolog	1	3.1	2	2	0.19	Neisseria gonorrhoeae MS11
36	1	D1DJ53	D1DJ53_NEIGO	guaB	Inosine-5'-monophosphate dehydrogenase	1	3.1	2	2	0.19	Neisseria gonorrhoeae MS11
39	1	D1DJL4	D1DJL4_NEIGO	infB	Translation initiation factor IF-2	1	2.9	2	2	0.19	Neisseria gonorrhoeae MS11
41	1	D1DJT9	D1DJT9_NEIGO	pyrG	CTP synthase	1	3.9	2	2	0.19	Neisseria gonorrhoeae MS11
42	1	D1DJV5	D1DJV5_NEIGO	NGFG_02032	Peptidyl-prolyl cis-trans isomerase	1	7	2	2	0.19	Neisseria gonorrhoeae MS11
49	1	D1DKJ5	D1DKJ5_NEIGO	rpsM	30S ribosomal protein S13	1	7.5	2	2	0.19	Neisseria gonorrhoeae MS11
50	1	D1DKK2	D1DKK2_NEIGO	rplF	50S ribosomal protein L6	1	11.9	2	2	0.19	Neisseria gonorrhoeae MS11
51	1	D1DKL8	D1DKL8_NEIGO	fusA	Elongation factor G	1	4.9	2	2	0.19	Neisseria gonorrhoeae MS11
53	1	D1DKT8	D1DKT8_NEIGO	NGFG_01824	Peptide methionine sulfoxide reductase msrA/msrB	1	3.8	2	2	0.19	Neisseria gonorrhoeae MS11
55	1	D1DKV0	D1DKV0_NEIGO	NGFG_01836	Membrane-bound lytic murein transglycosylase A(MltA)	1	6.1	2	2	0.19	Neisseria gonorrhoeae MS11
58	1	D1DL54	D1DL54_NEIGO	NGFG_01940	Phospholipase patatin family protein(lipid metabolic process)	1	10.1	2	2	0.19	Neisseria gonorrhoeae MS11
59	1	D1DL93	D1DL93_NEIGO	NGFG_01979	Twitching motility protein	1	5.4	2	2	0.19	Neisseria gonorrhoeae MS11
60	1	T2A2L7	T2A2L7_NEIGO	NGFG_02391	ComEA protein	1	29.3	2	2	0.19	Neisseria gonorrhoeae MS11
79	0.9851	D1DKH7	D1DKH7_NEIGO	NGFG_01716	Outer membrane protein OmpH	0.9851	5.4	1	2	0.19	Neisseria gonorrhoeae MS11
84	0.9823	D1DHP6	D1DHP6_NEIGO	lptE	LPS-assembly lipoprotein LptE	0.9823	5.7	1	2	0.19	Neisseria gonorrhoeae MS11
86	0.9823	D1DKX4	D1DKX4_NEIGO	rplM	50S ribosomal protein L13	0.9823	6.3	1	2	0.19	Neisseria gonorrhoeae MS11
87	0.9805	D1DFZ8	D1DFZ8_NEIGO	rpsT	30S ribosomal protein S20	0.9805	13.8	1	2	0.19	Neisseria gonorrhoeae MS11
94	0.9786	D1DJX1	D1DJX1_NEIGO	NGFG_02048	Imidazoleglycerol-phosphate dehydratase	0.9786	5.3	1	2	0.19	Neisseria gonorrhoeae MS11
100	0.9741	D1DFS4	D1DFS4_NEIGO	NGFG_01362	ABC transporter ATP-binding protein	0.9741	1.3	1	2	0.19	Neisseria gonorrhoeae MS11
64	0.9888	D1DFE8	D1DFE8_NEIGO	NGFG_01236	Uncharacterized protein	0.9888	2.5	1	1	0.09	Neisseria gonorrhoeae MS11
65	0.9878	D1DGF3	D1DGF3_NEIGO	NGFG_01591	Cytochrome c	0.9878	4.7	1	1	0.09	Neisseria gonorrhoeae MS11
66	0.9878	D1DIG4	D1DIG4_NEIGO	NGFG_00691	Uncharacterized protein	0.9878	4.5	1	1	0.09	Neisseria gonorrhoeae MS11
67	0.9878	D1DKK0	D1DKK0_NEIGO	rpsE	30S ribosomal protein S5	0.9878	7	1	1	0.09	Neisseria gonorrhoeae MS11
68	0.9869	D1DFP3	D1DFP3_NEIGO	NGFG_01331	Lipopolysaccharide transport periplasmic protein LptA	0.9869	6.3	1	1	0.09	Neisseria gonorrhoeae MS11
69	0.9869	D1DGN7	D1DGN7_NEIGO	NGFG_00064	Uncharacterized protein	0.9869	2.2	1	1	0.09	Neisseria gonorrhoeae MS11
70	0.9869	D1DGS3	D1DGS3_NEIGO	atpF	ATP synthase subunit b	0.9869	5.8	1	1	0.09	Neisseria gonorrhoeae MS11
72	0.986	D1DHQ0	D1DHQ0_NEIGO	NGFG_00427	Uncharacterized protein	0.986	3.1	1	1	0.09	Neisseria gonorrhoeae MS11
73	0.986	D1DJT5	D1DJT5_NEIGO	uvrA	UvrABC system protein A	0.986	1.6	1	1	0.09	Neisseria gonorrhoeae MS11
74	0.986	D1DKM0	D1DKM0_NEIGO	rpsL	30S ribosomal protein S12	0.986	8.1	1	1	0.09	Neisseria gonorrhoeae MS11
76	0.9851	D1DIK8	D1DIK8_NEIGO	secA	Protein translocase subunit SecA	0.9851	1.1	1	1	0.09	Neisseria gonorrhoeae MS11
77	0.9851	D1DIQ5	D1DIQ5_NEIGO	NGFG_00782	Heme-utilization protein Hup	0.9851	1.1	1	1	0.09	Neisseria gonorrhoeae MS11
78	0.9851	D1DIS9	D1DIS9_NEIGO	NGFG_00806	Peroxiredoxin	0.9851	3.7	1	1	0.09	Neisseria gonorrhoeae MS11
80	0.9841	D1DHI5	D1DHI5_NEIGO	NGFG_00362	MafB family adhesin protein	0.9841	1.6	1	1	0.09	Neisseria gonorrhoeae MS11
81	0.9841	D1DJ57	D1DJ57_NEIGO	NGFG_00934	Bacterioferritin(	0.9841	5.2	1	1	0.09	Neisseria gonorrhoeae MS11
82	0.9832	D1DIH6	D1DIH6_NEIGO	NGFG_00703	Transglycosylase	0.9832	3.4	1	1	0.09	Neisseria gonorrhoeae MS11
85	0.9823	D1DHX1	D1DHX1_NEIGO	NGFG_00498	Twitching motility protein	0.9823	2.7	1	1	0.09	Neisseria gonorrhoeae MS11
88	0.9805	D1DGP8	D1DGP8_NEIGO	NGFG_00075	Lipoprotein	0.9805	4.7	1	1	0.09	Neisseria gonorrhoeae MS11
89	0.9805	D1DHG3	D1DHG3_NEIGO	lolA	Outer-membrane lipoprotein carrier protein	0.9805	5.8	1	1	0.09	Neisseria gonorrhoeae MS11
90	0.9805	D1DI89	D1DI89_NEIGO	NGFG_00616	Succinyldiaminopimelate transaminase	0.9805	3.3	1	1	0.09	Neisseria gonorrhoeae MS11
91	0.9796	D1DIL2	D1DIL2_NEIGO	NGFG_00739	Outer membrane protein H.8(Copper ion binding)	0.9796	4.9	1	1	0.09	Neisseria gonorrhoeae MS11
92	0.9796	D1DKV4	D1DKV4_NEIGO	metG	Methionine--tRNA ligase	0.9796	1.8	1	1	0.09	Neisseria gonorrhoeae MS11
95	0.9786	D1DKL4	D1DKL4_NEIGO	rplB	50S ribosomal protein L2	0.9786	4	1	1	0.09	Neisseria gonorrhoeae MS11
96	0.9777	D1DFE3	D1DFE3_NEIGO	proS	Proline--tRNA ligase	0.9777	2.3	1	1	0.09	Neisseria gonorrhoeae MS11
97	0.9777	D1DJ17	D1DJ17_NEIGO	NGFG_00894	Lipoprotein	0.9777	4	1	1	0.09	Neisseria gonorrhoeae MS11
98	0.9768	D1DI83	D1DI83_NEIGO	NGFG_00610	Prepilin-type N-terminal cleavage/methylation domain-containing protein	0.9768	4.3	1	1	0.09	Neisseria gonorrhoeae MS11
99	0.975	D1DI43	D1DI43_NEIGO	NGFG_00570	Uncharacterized protein	0.975	11.2	1	1	0.09	Neisseria gonorrhoeae MS11
101	0.9732	D1DHF8	D1DHF8_NEIGO	rho	Transcription termination factor Rho	0.9732	2.6	1	1	0.09	Neisseria gonorrhoeae MS11
102	0.9723	D1DJC9	D1DJC9_NEIGO	NGFG_01006	Uncharacterized protein	0.9723	8.2	1	1	0.09	Neisseria gonorrhoeae MS11
103	0.9714	D1DHM9	D1DHM9_NEIGO	NGFG_00406	Cell division protein FtsN	0.9714	3.2	1	1	0.09	Neisseria gonorrhoeae MS11
104	0.9714	D1DJS8	D1DJS8_NEIGO	NGFG_02005	Sulfatase	0.9714	1.5	1	1	0.09	Neisseria gonorrhoeae MS11
105	0.9678	D1DKL0	D1DKL0_NEIGO	rplP	50S ribosomal protein L16	0.9678	6.5	1	1	0.09	Neisseria gonorrhoeae MS11
106	0.9652	D1DF73	D1DF73_NEIGO	NGFG_01161	L-lactate dehydrogenase	0.9652	2.1	1	1	0.09	Neisseria gonorrhoeae MS11
107	0.9643	D1DKK5	D1DKK5_NEIGO	rplE	50S ribosomal protein L5	0.9643	3.9	1	1	0.09	Neisseria gonorrhoeae MS11
108	0.9634	D1DHC8	D1DHC8_NEIGO	NGFG_00305	Zinc/manganese ABC transporter substrate-binding protein	0.9634	3	1	1	0.09	Neisseria gonorrhoeae MS11
109	0.9555	D1DFC4	D1DFC4_NEIGO	rplI	50S ribosomal protein L9	0.9555	7.3	1	1	0.09	Neisseria gonorrhoeae MS11
110	0.9546	D1DJD3	D1DJD3_NEIGO	NGFG_01010	Homoserine dehydrogenase	0.9546	1.8	1	1	0.09	Neisseria gonorrhoeae MS11
										87.93

## Sheet: Crude
entry no.	group probability	Uniprot ID	Accession	Gene	Description	protein probability	percent coverage	num unique peps	tot indep spectra	percent share of spectrum ids	Organism	Other IDs
125	1	D1DKI6	D1DKI6_NEIGO	NGFG_01725	Major outer membrane protein P.IB (PorB)	1	76.3	45	657	21.95	Neisseria gonorrhoeae MS11
28	1	D1DFR9	D1DFR9_NEIGO	NGFG_01357	Outer membrane protein P.III	1	62.7	24	135	4.5	Neisseria gonorrhoeae MS11
46	1	D1DGL7	D1DGL7_NEIGO	groL	60 kDa chaperonin	1	47.2	34	115	3.84	Neisseria gonorrhoeae MS11
138	1	D1DKP9	D1DKP9_NEIGO	NGFG_01788	LysM protein	1	60.9	24	62	2.07	Neisseria gonorrhoeae MS11
84	1	D1DIF6	D1DIF6_NEIGO	NGFG_00683	Lipoprotein NlpD	1	38	14	57	1.91	Neisseria gonorrhoeae MS11
43	1	D1DGB8	D1DGB8_NEIGO	NGFG_01556	NodT family efflux transporter, outer membrane factor (OMF) lipoprotein	1	33.4	14	50	1.67	Neisseria gonorrhoeae MS11
90	1	D1DIQ9	D1DIQ9_NEIGO	NGFG_00786	Lipoprotein	1	37.9	15	45	1.51	Neisseria gonorrhoeae MS11
83	1	D1DIE8	D1DIE8_NEIGO	NGFG_00675	Lipoprotein	1	32.5	6	44	1.47	Neisseria gonorrhoeae MS11
144	1	D1DL15	D1DL15_NEIGO	NGFG_01901	Phospholipid-binding protein	1	54	8	44	1.47	Neisseria gonorrhoeae MS11
158	1	T2A4H1	T2A4H1_NEIGO	tuf	Elongation factor Tu	1	38.1	14	43	1.44	Neisseria gonorrhoeae MS11
123	1	D1DKH6	D1DKH6_NEIGO	bamA	Outer membrane protein assembly factor BamA	1	22.6	19	42	1.4	Neisseria gonorrhoeae MS11
41	1	D1DGB6	D1DGB6_NEIGO	NGFG_01554	Membrane fusion protein mtrC	1	62.6	16	39	1.3	Neisseria gonorrhoeae MS11
54	1	D1DH55	D1DH55_NEIGO	NGFG_00232	Type IV pilus biogenesis and competence protein pilQ	1	28.9	18	35	1.17	Neisseria gonorrhoeae MS11
112	1	D1DK29	D1DK29_NEIGO	NGFG_02106	Uncharacterized protein	1	51.4	16	31	1.03	Neisseria gonorrhoeae MS11
106	1	D1DJV5	D1DJV5_NEIGO	NGFG_02032	Peptidyl-prolyl cis-trans isomerase	1	38.6	11	30	1	Neisseria gonorrhoeae MS11
31	1	D1DFW3	D1DFW3_NEIGO	ftsZ	Cell division protein FtsZ	1	33.9	11	28	0.94	Neisseria gonorrhoeae MS11
160a	1	D1DGI7	D1DGI7_NEIGO	NGFG_00014	Pilin pilS1c456	1	14.1	9	23	0.84	Neisseria gonorrhoeae MS11
160b	1	D1DKT5	D1DKT5_NEIGO	NGFG_01821	Pilin pilE	1	31.9	4	18	0.64	Neisseria gonorrhoeae MS11
160c	1	D1DKT0	D1DKT0_NEIGO	NGFG_02253	Pilin pilS1c12	1	18.1	2	3	0.18	Neisseria gonorrhoeae MS11
160d	1	T2A4I6	T2A4I6_NEIGO	NGFG_02481	Pilin pilS6c1	1	36	2	2	0.11	Neisseria gonorrhoeae MS11
160e	1	D1DKT3	D1DKT3_NEIGO	NGFG_01819	Pilin pilEuss2	0		0	0		Neisseria gonorrhoeae MS11
160f	1	T2A362	T2A362_NEIGO,tr	NGFG_02431	Pilin pilS7	0		0	0		Neisseria gonorrhoeae MS11	T2A3A3	T2A3A3_NEIGO,tr	T2A3Y0	T2A3Y0_NEIGO
160g	1	T2A3A7	T2A3A7_NEIGO	NGFG_02487	Pilin pilS1c3	0		0	0		Neisseria gonorrhoeae MS11
160h	1	T2A431	T2A431_NEIGO	NGFG_02484	Pilin pilS2c1	0		0	0		Neisseria gonorrhoeae MS11
47	1	D1DGM9	D1DGM9_NEIGO	NGFG_00056	Adhesion and penetration protein	1	12	15	25	0.83	Neisseria gonorrhoeae MS11
21	1	D1DFE4	D1DFE4_NEIGO	NGFG_01232	Pyruvate dehydrogenase E1 component	1	21.1	15	24	0.8	Neisseria gonorrhoeae MS11
155	1	T2A269	T2A269_NEIGO	pnp	Polyribonucleotide nucleotidyltransferase	1	25.6	13	23	0.77	Neisseria gonorrhoeae MS11
50	1	D1DGR6	D1DGR6_NEIGO	NGFG_00093	Lipoprotein	1	34	9	21	0.7	Neisseria gonorrhoeae MS11
88	1	D1DIL2	D1DIL2_NEIGO	NGFG_00739	Outer membrane protein H.8	1	31.1	5	21	0.7	Neisseria gonorrhoeae MS11
116	1	D1DK86	D1DK86_NEIGO	NGFG_01625	Peptidyl-prolyl cis-trans isomerase SurA	1	36.7	8	21	0.7	Neisseria gonorrhoeae MS11
93	1	D1DIZ2	D1DIZ2_NEIGO	NGFG_00869	Uncharacterized protein	1	32.5	4	20	0.67	Neisseria gonorrhoeae MS11
65	1	D1DHH6	D1DHH6_NEIGO	NGFG_00353	Major ferric iron-binding protein	1	22.4	8	19	0.64	Neisseria gonorrhoeae MS11
49	1	D1DGR2	D1DGR2_NEIGO	NGFG_00089	Soluble lytic murein transglycosylase	1	32.1	12	19	0.63	Neisseria gonorrhoeae MS11
25	1	D1DFF6	D1DFF6_NEIGO	NGFG_01244	Uncharacterized protein	1	41.6	9	18	0.6	Neisseria gonorrhoeae MS11
91	1	D1DIS9	D1DIS9_NEIGO	NGFG_00806	Peroxiredoxin	1	27.8	7	17	0.57	Neisseria gonorrhoeae MS11
122	1	D1DKF8	D1DKF8_NEIGO	rne	Ribonuclease E	1	15.2	12	17	0.57	Neisseria gonorrhoeae MS11
33	1	D1DFZ9	D1DFZ9_NEIGO	NGFG_01437	Phospholipase A1	1	24.8	6	16	0.53	Neisseria gonorrhoeae MS11
66	1	D1DHJ2	D1DHJ2_NEIGO	NGFG_00369	Opacity protein	1	35.4	6	16	0.53	Neisseria gonorrhoeae MS11
16	1	D1DFB4	D1DFB4_NEIGO	NGFG_01202	Type IV pilus biogenesis/stability protein PilW	1	35.2	8	14	0.47	Neisseria gonorrhoeae MS11
18	1	D1DFD4	D1DFD4_NEIGO	NGFG_01222	Carbonic anhydrase	1	21.8	6	14	0.47	Neisseria gonorrhoeae MS11
70	1	D1DHP1	D1DHP1_NEIGO	bamD	Outer membrane protein assembly factor BamD	1	21.5	5	14	0.47	Neisseria gonorrhoeae MS11
32	1	D1DFZ7	D1DFZ7_NEIGO	NGFG_01435	Putrescine-binding periplasmic protein	1	20.5	7	13	0.43	Neisseria gonorrhoeae MS11
157	1	T2A2L7	T2A2L7_NEIGO	NGFG_02391	ComEA protein	1	53.5	5	13	0.43	Neisseria gonorrhoeae MS11
22	1	D1DFE5	D1DFE5_NEIGO	NGFG_01233	Dihydrolipoyllysine-residue acetyltransferase	1	17.5	7	12	0.4	Neisseria gonorrhoeae MS11
29	1	D1DFT7	D1DFT7_NEIGO	NGFG_01375	Uncharacterized protein	1	14.7	3	12	0.4	Neisseria gonorrhoeae MS11
38	1	D1DG52	D1DG52_NEIGO	dnaK	Chaperone protein DnaK	1	27.9	10	12	0.4	Neisseria gonorrhoeae MS11
52	1	D1DGS7	D1DGS7_NEIGO	atpD	ATP synthase subunit beta	1	20.9	7	12	0.4	Neisseria gonorrhoeae MS11
63	1	D1DHF9	D1DHF9_NEIGO	NGFG_00336	Phosphoenolpyruvate synthase	1	11.8	7	12	0.4	Neisseria gonorrhoeae MS11
99	1	D1DJ97	D1DJ97_NEIGO	NGFG_00974	Uncharacterized protein	1	39.2	6	12	0.4	Neisseria gonorrhoeae MS11
137	1	D1DKN1	D1DKN1_NEIGO	rplA	50S ribosomal protein L1	1	24.2	5	12	0.4	Neisseria gonorrhoeae MS11
150	1	D1DL54	D1DL54_NEIGO	NGFG_01940	Phospholipase patatin family protein	1	14.1	3	12	0.4	Neisseria gonorrhoeae MS11
19	1	D1DFD6	D1DFD6_NEIGO	NGFG_01224	C-terminal processing peptidase	1	22.2	8	11	0.37	Neisseria gonorrhoeae MS11
56	1	D1DH57	D1DH57_NEIGO	NGFG_00234	Type IV pilus assembly protein PilO	1	24.2	5	11	0.37	Neisseria gonorrhoeae MS11
42	1	D1DGB7	D1DGB7_NEIGO	NGFG_01555	Hydrophobe/amphiphile efflux-1 (HAE1) family RND transporter	1	11.3	7	10	0.33	Neisseria gonorrhoeae MS11
57	1	D1DH59	D1DH59_NEIGO	NGFG_00236	Type IV pilus assembly protein PilM	1	34.5	7	10	0.33	Neisseria gonorrhoeae MS11
76	1	D1DHZ6	D1DHZ6_NEIGO	NGFG_00523	Amino acid ABC transporter substrate-binding protein	1	30.7	6	10	0.33	Neisseria gonorrhoeae MS11
98	1	D1DJ64	D1DJ64_NEIGO	NGFG_00941	Outer membrane protein	1	12.7	3	10	0.33	Neisseria gonorrhoeae MS11
101	1	D1DJI9	D1DJI9_NEIGO	NGFG_02217	Adhesin mafA	1	24.4	6	10	0.33	Neisseria gonorrhoeae MS11
58	1	D1DH60	D1DH60_NEIGO	NGFG_00237	Penicillin-binding protein 1A	1	14.4	7	9	0.3	Neisseria gonorrhoeae MS11
141	1	D1DKU2	D1DKU2_NEIGO	NGFG_01828	Uncharacterized protein	1	13.8	5	9	0.3	Neisseria gonorrhoeae MS11
156	1	T2A2B7	T2A2B7_NEIGO	NGFG_02339	Uncharacterized protein	1	36.8	4	9	0.3	Neisseria gonorrhoeae MS11
69	1	D1DHN9	D1DHN9_NEIGO	NGFG_00416	IgA-specific serine endopeptidase autotransporter	1	5.2	6	8	0.27	Neisseria gonorrhoeae MS11
73	1	D1DHW3	D1DHW3_NEIGO	NGFG_00490	Cysteine synthase	1	12.6	3	8	0.27	Neisseria gonorrhoeae MS11
174	0.9999	D1DKX3	D1DKX3_NEIGO	rpsI	30S ribosomal protein S9	0.9999	23.8	2	8	0.27	Neisseria gonorrhoeae MS11
30	1	D1DFW2	D1DFW2_NEIGO	NGFG_01400	Cell division protein ftsA	1	22.7	7	7	0.23	Neisseria gonorrhoeae MS11
48	1	D1DGP8	D1DGP8_NEIGO	NGFG_00075	Lipoprotein	1	14.2	4	7	0.23	Neisseria gonorrhoeae MS11
71	1	D1DHP6	D1DHP6_NEIGO	lptE	LPS-assembly lipoprotein LptE	1	25.2	3	7	0.23	Neisseria gonorrhoeae MS11
81	1	D1DI80	D1DI80_NEIGO	NGFG_00607	Type IV pilus modification protein PilV	1	22.8	3	7	0.23	Neisseria gonorrhoeae MS11
114	1	D1DK42	D1DK42_NEIGO	NGFG_02119	Type IV pilus assembly protein PilC	1	10	3	7	0.23	Neisseria gonorrhoeae MS11
121	1	D1DKF2	D1DKF2_NEIGO	bamE	Outer membrane protein assembly factor BamE	1	35.2	4	7	0.23	Neisseria gonorrhoeae MS11
132	1	D1DKL4	D1DKL4_NEIGO	rplB	50S ribosomal protein L2	1	13.4	4	7	0.23	Neisseria gonorrhoeae MS11
153	1	D1DL72	D1DL72_NEIGO	NGFG_01958	Glyceraldehyde-3-phosphate dehydrogenase	1	13.5	3	7	0.23	Neisseria gonorrhoeae MS11
14	1	D1DF93	D1DF93_NEIGO	eno	Enolase	1	14.5	4	6	0.2	Neisseria gonorrhoeae MS11
36	1	D1DG42	D1DG42_NEIGO	NGFG_01480	Efflux transporter, RND family, MFP subunit	1	12.5	3	6	0.2	Neisseria gonorrhoeae MS11
44	1	D1DGC3	D1DGC3_NEIGO	NGFG_01561	Glutamate dehydrogenase	1	11.3	3	6	0.2	Neisseria gonorrhoeae MS11
45	1	D1DGF3	D1DGF3_NEIGO	NGFG_01591	Cytochrome c	1	23.3	5	6	0.2	Neisseria gonorrhoeae MS11
60	1	D1DHE7	D1DHE7_NEIGO	NGFG_00324	Zinc-binding alcohol dehydrogenase	1	22	6	6	0.2	Neisseria gonorrhoeae MS11
89	1	D1DIN0	D1DIN0_NEIGO	dsbD	Thiol:disulfide interchange protein DsbD	1	12.8	5	6	0.2	Neisseria gonorrhoeae MS11
117	1	D1DK87	D1DK87_NEIGO	lptD	LPS-assembly protein LptD	1	9.9	4	6	0.2	Neisseria gonorrhoeae MS11
118	1	D1DK89	D1DK89_NEIGO	NGFG_01628	Thiol:disulfide interchange protein DsbA	1	20.3	4	6	0.2	Neisseria gonorrhoeae MS11
129	1	D1DKK7	D1DKK7_NEIGO	rplN	50S ribosomal protein L14	1	18.9	2	6	0.2	Neisseria gonorrhoeae MS11
130	1	D1DKL0	D1DKL0_NEIGO	rplP	50S ribosomal protein L16	1	16.7	3	6	0.2	Neisseria gonorrhoeae MS11
136	1	D1DKM7	D1DKM7_NEIGO	rpoB	DNA-directed RNA polymerase subunit beta	1	4.5	6	6	0.2	Neisseria gonorrhoeae MS11
154	1	D1DL93	D1DL93_NEIGO	NGFG_01979	Twitching motility protein	1	21.8	6	6	0.2	Neisseria gonorrhoeae MS11
11	1	D1DF67	D1DF67_NEIGO	clpX	ATP-dependent Clp protease ATP-binding subunit ClpX	1	6.3	2	5	0.17	Neisseria gonorrhoeae MS11
13	1	D1DF85	D1DF85_NEIGO	NGFG_01173	Lytic murein transglycosylase B	1	18.7	4	5	0.17	Neisseria gonorrhoeae MS11
39	1	D1DGA8	D1DGA8_NEIGO	NGFG_01546	Cytochrome c oxidase, cbb3-type, subunit II	1	16.3	4	5	0.17	Neisseria gonorrhoeae MS11
40	1	D1DGB0	D1DGB0_NEIGO	NGFG_01548	Cytochrome c oxidase, cbb3-type, subunit III	1	17.3	4	5	0.17	Neisseria gonorrhoeae MS11
59	1	D1DHC8	D1DHC8_NEIGO	NGFG_00305	Zinc/manganese ABC transporter substrate-binding protein	1	18.1	4	5	0.17	Neisseria gonorrhoeae MS11
64	1	D1DHG4	D1DHG4_NEIGO	NGFG_00341	Putrescine-binding periplasmic protein	1	10.3	3	5	0.17	Neisseria gonorrhoeae MS11
77	1	D1DI07	D1DI07_NEIGO	ftsH	ATP-dependent zinc metalloprotease FtsH	1	7.8	4	5	0.17	Neisseria gonorrhoeae MS11
108	1	D1DJX1	D1DJX1_NEIGO	NGFG_02048	Imidazoleglycerol-phosphate dehydratase	1	5.3	2	5	0.17	Neisseria gonorrhoeae MS11
113	1	D1DK35	D1DK35_NEIGO	NGFG_02112	Uncharacterized protein	1	13.9	5	5	0.17	Neisseria gonorrhoeae MS11
128	1	D1DKK4	D1DKK4_NEIGO	rpsN	30S ribosomal protein S14	1	16.8	3	5	0.17	Neisseria gonorrhoeae MS11
134	1	D1DKL7	D1DKL7_NEIGO	rplC	50S ribosomal protein L3	1	23.8	4	5	0.17	Neisseria gonorrhoeae MS11
135	1	D1DKL9	D1DKL9_NEIGO	rpsG	30S ribosomal protein S7	1	17.9	3	5	0.17	Neisseria gonorrhoeae MS11
147	1	D1DL24	D1DL24_NEIGO	rpsB	30S ribosomal protein S2	1	18.2	3	5	0.17	Neisseria gonorrhoeae MS11
161a	1	D1DJI4	D1DJI4_NEIGO	NGFG_02238	Opacity protein	1	13.5	4	6	0.17	Neisseria gonorrhoeae MS11
161b	1	T2A343	T2A343_NEIGO,tr	NGFG_02406	Opacity protein	0.987	14.6	1	1	0.07	Neisseria gonorrhoeae MS11	T2A460	T2A460_NEIGO
161c	1	T2A2J6	T2A2J6_NEIGO,tr	NGFG_02432	Opacity protein	0		0	0		Neisseria gonorrhoeae MS11	T2A3P8	T2A3P8_NEIGO,tr	T2A3R4	T2A3R4_NEIGO,tr	T2A3Z8	T2A3Z8_NEIGO,tr	T2A4E5	T2A4E5_NEIGO
162a	1	T2A2N7	T2A2N7_NEIGO	NGFG_02478	MafB family adhesin protein	1	11.9	4	5	0.17	Neisseria gonorrhoeae MS11
162b	1	D1DIE5	D1DIE5_NEIGO,tr	NGFG_00672	MafB family adhesin protein	0		0	0		Neisseria gonorrhoeae MS11	D1DL29	D1DL29_NEIGO,tr	T2A3K0	T2A3K0_NEIGO
12	1	D1DF73	D1DF73_NEIGO	NGFG_01161	L-lactate dehydrogenase	1	14.1	4	4	0.13	Neisseria gonorrhoeae MS11
26	1	D1DFP3	D1DFP3_NEIGO	NGFG_01331	Lipopolysaccharide transport periplasmic protein LptA	1	34.1	4	4	0.13	Neisseria gonorrhoeae MS11
27	1	D1DFP8	D1DFP8_NEIGO	NGFG_01336	Glutamine synthetase	1	8.5	3	4	0.13	Neisseria gonorrhoeae MS11
35	1	D1DG20	D1DG20_NEIGO	NGFG_01458	NAD(P) transhydrogenase subunit alpha	1	11.1	4	4	0.13	Neisseria gonorrhoeae MS11
51	1	D1DGS3	D1DGS3_NEIGO	atpF	ATP synthase subunit b	1	23.7	4	4	0.13	Neisseria gonorrhoeae MS11
55	1	D1DH56	D1DH56_NEIGO	NGFG_00233	Type IV pilus assembly protein PilP	1	27.1	3	4	0.13	Neisseria gonorrhoeae MS11
61	1	D1DHF0	D1DHF0_NEIGO	secD	Protein translocase subunit SecD	1	8.6	3	4	0.13	Neisseria gonorrhoeae MS11
67	1	D1DHJ6	D1DHJ6_NEIGO	NGFG_00373	Cell division protein ZipA	1	9.6	4	4	0.13	Neisseria gonorrhoeae MS11
79	1	D1DI47	D1DI47_NEIGO	NGFG_00574	Uncharacterized protein	1	20.9	4	4	0.13	Neisseria gonorrhoeae MS11
80	1	D1DI65	D1DI65_NEIGO	NGFG_00592	Outer-membrane lipoprotein lolB	1	16.1	2	4	0.13	Neisseria gonorrhoeae MS11
95	1	D1DJ01	D1DJ01_NEIGO	NGFG_00878	DNA translocase ftsK 2	1	4.8	3	4	0.13	Neisseria gonorrhoeae MS11
102	1	D1DJK4	D1DJK4_NEIGO	NGFG_02152	Muramoyltetrapeptide carboxypeptidase	1	13.7	4	4	0.13	Neisseria gonorrhoeae MS11
104	1	D1DJL4	D1DJL4_NEIGO	infB	Translation initiation factor IF-2	1	4.7	3	4	0.13	Neisseria gonorrhoeae MS11
110	1	D1DJY5	D1DJY5_NEIGO	alaS	Alanine--tRNA ligase	1	3.1	2	4	0.13	Neisseria gonorrhoeae MS11
124	1	D1DKH7	D1DKH7_NEIGO	NGFG_01716	Outer membrane protein OmpH	1	13.9	4	4	0.13	Neisseria gonorrhoeae MS11
145	1	D1DL16	D1DL16_NEIGO	NGFG_01902	Uncharacterized protein	1	14.8	2	4	0.13	Neisseria gonorrhoeae MS11
146	1	D1DL19	D1DL19_NEIGO	NGFG_01905	Uncharacterized protein	1	20.5	3	4	0.13	Neisseria gonorrhoeae MS11
151	1	D1DL67	D1DL67_NEIGO	NGFG_01953	Electron transfer flavoprotein alpha subunit EtfA	1	9.6	2	4	0.13	Neisseria gonorrhoeae MS11
152	1	D1DL68	D1DL68_NEIGO	NGFG_01954	Electron transfer flavoprotein beta subunit ETFB	1	14.9	3	4	0.13	Neisseria gonorrhoeae MS11
167	0.9999	D1DHG3	D1DHG3_NEIGO	lolA	Outer-membrane lipoprotein carrier protein	0.9999	14.5	2	4	0.13	Neisseria gonorrhoeae MS11
178	0.9997	D1DIG7	D1DIG7_NEIGO	NGFG_00694	Chaperone ClpB	0.9997	2.8	2	4	0.13	Neisseria gonorrhoeae MS11
199	0.9875	D1DG55	D1DG55_NEIGO	erpA	Putative iron-sulfur cluster insertion protein ErpA	0.9875	9.2	1	4	0.13	Neisseria gonorrhoeae MS11
230	0.9864	D1DFZ8	D1DFZ8_NEIGO	rpsT	30S ribosomal protein S20	0.9864	13.8	1	4	0.13	Neisseria gonorrhoeae MS11
15	1	D1DFA6	D1DFA6_NEIGO	NGFG_01194	30S ribosomal protein S1	1	6.4	2	3	0.1	Neisseria gonorrhoeae MS11
17	1	D1DFB7	D1DFB7_NEIGO	tig	Trigger factor	1	9.4	3	3	0.1	Neisseria gonorrhoeae MS11
20	1	D1DFD7	D1DFD7_NEIGO	NGFG_01225	Metallopeptidase	1	8	3	3	0.1	Neisseria gonorrhoeae MS11
23	1	D1DFE6	D1DFE6_NEIGO	NGFG_01234	Dihydrolipoyl dehydrogenase	1	7.2	3	3	0.1	Neisseria gonorrhoeae MS11
34	1	D1DG01	D1DG01_NEIGO	aspS	Aspartate--tRNA ligase	1	5	3	3	0.1	Neisseria gonorrhoeae MS11
53	1	D1DGV4	D1DGV4_NEIGO	yidC	Membrane protein insertase YidC	1	9	3	3	0.1	Neisseria gonorrhoeae MS11
62	1	D1DHF8	D1DHF8_NEIGO	rho	Transcription termination factor Rho	1	7.6	3	3	0.1	Neisseria gonorrhoeae MS11
74	1	D1DHW8	D1DHW8_NEIGO	NGFG_00495	Signal peptidase I	1	12.7	3	3	0.1	Neisseria gonorrhoeae MS11
75	1	D1DHY4	D1DHY4_NEIGO	NGFG_00511	Uncharacterized protein	1	10.8	3	3	0.1	Neisseria gonorrhoeae MS11
82	1	D1DID0	D1DID0_NEIGO	NGFG_00657	Cytochrome c	1	24.3	3	3	0.1	Neisseria gonorrhoeae MS11
85	1	D1DIG4	D1DIG4_NEIGO	NGFG_00691	Uncharacterized protein	1	16	3	3	0.1	Neisseria gonorrhoeae MS11
94	1	D1DIZ3	D1DIZ3_NEIGO	NGFG_00870	Uncharacterized protein	1	10	2	3	0.1	Neisseria gonorrhoeae MS11
96	1	D1DJ53	D1DJ53_NEIGO	guaB	Inosine-5'-monophosphate dehydrogenase	1	8.2	3	3	0.1	Neisseria gonorrhoeae MS11
103	1	D1DJK6	D1DJK6_NEIGO	NGFG_02154	Copper-containing nitrite reductase	1	8.9	2	3	0.1	Neisseria gonorrhoeae MS11
105	1	D1DJT3	D1DJT3_NEIGO	NGFG_02010	TonB-dependent receptor	1	6.2	3	3	0.1	Neisseria gonorrhoeae MS11
111	1	D1DK08	D1DK08_NEIGO	NGFG_02085	Histidine-binding protein	1	19.8	3	3	0.1	Neisseria gonorrhoeae MS11
115	1	D1DK75	D1DK75_NEIGO	NGFG_01614	Uncharacterized protein	1	9.9	3	3	0.1	Neisseria gonorrhoeae MS11
120	1	D1DKD9	D1DKD9_NEIGO	NGFG_01678	Catalase	1	4.8	2	3	0.1	Neisseria gonorrhoeae MS11
127	1	D1DKK0	D1DKK0_NEIGO	rpsE	30S ribosomal protein S5	1	12.8	2	3	0.1	Neisseria gonorrhoeae MS11
131	1	D1DKL1	D1DKL1_NEIGO	rpsC	30S ribosomal protein S3	1	13	2	3	0.1	Neisseria gonorrhoeae MS11
133	1	D1DKL6	D1DKL6_NEIGO	rplD	50S ribosomal protein L4	1	11.2	3	3	0.1	Neisseria gonorrhoeae MS11
139	1	D1DKT8	D1DKT8_NEIGO	NGFG_01824	Peptide methionine sulfoxide reductase msrA/msrB	1	7.7	3	3	0.1	Neisseria gonorrhoeae MS11
140	1	D1DKU1	D1DKU1_NEIGO	NGFG_01827	ABC transporter periplasmic binding protein, thiB subfamily	1	9.9	2	3	0.1	Neisseria gonorrhoeae MS11
142	1	D1DKV0	D1DKV0_NEIGO	NGFG_01836	Membrane-bound lytic murein transglycosylase A	1	12.5	3	3	0.1	Neisseria gonorrhoeae MS11
163	0.9999	D1DFU3	D1DFU3_NEIGO	NGFG_01381	Thiol:disulfide interchange protein	0.9999	14.5	2	3	0.1	Neisseria gonorrhoeae MS11
165	0.9999	D1DG43	D1DG43_NEIGO	NGFG_01481	Macrolide export ATP-binding/permease MacB	0.9999	6.8	2	3	0.1	Neisseria gonorrhoeae MS11
169	0.9999	D1DIT9	D1DIT9_NEIGO	NGFG_00816	2-oxoglutarate dehydrogenase E2 component (Dihydrolipoamide succinyltransferase)	0.9999	14.2	2	3	0.1	Neisseria gonorrhoeae MS11
171	0.9999	D1DJG6	D1DJG6_NEIGO	NGFG_01043	DNA polymerase III, subunit gamma and tau	0.9999	4.5	2	3	0.1	Neisseria gonorrhoeae MS11
173	0.9999	D1DKL5	D1DKL5_NEIGO	rplW	50S ribosomal protein L23	0.9999	34.6	2	3	0.1	Neisseria gonorrhoeae MS11
175	0.9998	D1DGA7	D1DGA7_NEIGO	NGFG_01545	Cytochrome c oxidase, cbb3-type, subunit I	0.9998	3.1	2	3	0.1	Neisseria gonorrhoeae MS11
228	0.9875	D1DL61	D1DL61_NEIGO	NGFG_01947	Lipoprotein	0.9875	12.1	1	3	0.1	Neisseria gonorrhoeae MS11
10	1	D1DF35	D1DF35_NEIGO	leuB	3-isopropylmalate dehydrogenase	1	9	2	2	0.07	Neisseria gonorrhoeae MS11
24	1	D1DFE8	D1DFE8_NEIGO	NGFG_01236	Uncharacterized protein	1	6.6	2	2	0.07	Neisseria gonorrhoeae MS11
37	1	D1DG44	D1DG44_NEIGO	NGFG_01482	Thiol:disulfide interchange protein DsbC	1	11.5	2	2	0.07	Neisseria gonorrhoeae MS11
68	1	D1DHK9	D1DHK9_NEIGO	NGFG_00386	Uncharacterized protein	1	16.3	2	2	0.07	Neisseria gonorrhoeae MS11
72	1	D1DHU7	D1DHU7_NEIGO	hfq	RNA-binding protein Hfq	1	40.2	2	2	0.07	Neisseria gonorrhoeae MS11
78	1	D1DI43	D1DI43_NEIGO	NGFG_00570	Uncharacterized protein	1	23.4	2	2	0.07	Neisseria gonorrhoeae MS11
86	1	D1DII4	D1DII4_NEIGO	NGFG_00711	Ferredoxin	1	6.8	2	2	0.07	Neisseria gonorrhoeae MS11
87	1	D1DIK8	D1DIK8_NEIGO	secA	Protein translocase subunit SecA	1	3.7	2	2	0.07	Neisseria gonorrhoeae MS11
92	1	D1DIU0	D1DIU0_NEIGO	NGFG_00817	Dihydrolipoyl dehydrogenase	1	5.7	2	2	0.07	Neisseria gonorrhoeae MS11
97	1	D1DJ57	D1DJ57_NEIGO	NGFG_00934	Bacterioferritin	1	12.3	2	2	0.07	Neisseria gonorrhoeae MS11
100	1	D1DJG8	D1DJG8_NEIGO	recA	Protein RecA	1	8.6	2	2	0.07	Neisseria gonorrhoeae MS11
107	1	D1DJW0	D1DJW0_NEIGO	NGFG_02037	Aconitate hydratase 2	1	3.4	2	2	0.07	Neisseria gonorrhoeae MS11
109	1	D1DJY4	D1DJY4_NEIGO	NGFG_02061	Putrescine-binding periplasmic protein	1	7.4	2	2	0.07	Neisseria gonorrhoeae MS11
119	1	D1DKC6	D1DKC6_NEIGO	NGFG_01665	Uncharacterized protein	1	6.1	2	2	0.07	Neisseria gonorrhoeae MS11
126	1	D1DKJ5	D1DKJ5_NEIGO	rpsM	30S ribosomal protein S13	1	18.3	2	2	0.07	Neisseria gonorrhoeae MS11
143	1	D1DKZ7	D1DKZ7_NEIGO	NGFG_01883	Uncharacterized protein	1	15	2	2	0.07	Neisseria gonorrhoeae MS11
148	1	D1DL38	D1DL38_NEIGO	NGFG_01924	Signal peptide peptidase SppA, 36K type	1	7.6	2	2	0.07	Neisseria gonorrhoeae MS11
149	1	D1DL48	D1DL48_NEIGO	NGFG_01934	Outer membrane protein	1	5.4	2	2	0.07	Neisseria gonorrhoeae MS11
164	0.9999	D1DG40	D1DG40_NEIGO	NGFG_01478	Alcohol dehydrogenase, propanol-preferring	0.9999	6.6	2	2	0.07	Neisseria gonorrhoeae MS11
166	0.9999	D1DG63	D1DG63_NEIGO	nqrF	Na(+)-translocating NADH-quinone reductase subunit F	0.9999	7.7	2	2	0.07	Neisseria gonorrhoeae MS11
168	0.9999	D1DIC9	D1DIC9_NEIGO	NGFG_00656	CMP-N-acetylneuraminate-beta-galactosamide-alpha-2,3-sialyltransferase	0.9999	6.6	2	2	0.07	Neisseria gonorrhoeae MS11
170	0.9999	D1DIW3	D1DIW3_NEIGO	NGFG_00840	Uncharacterized protein	0.9999	23.7	2	2	0.07	Neisseria gonorrhoeae MS11
172	0.9999	D1DKE5	D1DKE5_NEIGO	gyrB	DNA gyrase subunit B	0.9999	2.5	2	2	0.07	Neisseria gonorrhoeae MS11
176	0.9998	D1DI40	D1DI40_NEIGO	NGFG_00567	Uncharacterized protein	0.9998	4.9	2	2	0.07	Neisseria gonorrhoeae MS11
177	0.9998	D1DIT5	D1DIT5_NEIGO	NGFG_00812	Succinate dehydrogenase and fumarate reductase iron-sulfur protein	0.9998	9.4	2	2	0.07	Neisseria gonorrhoeae MS11
179	0.9997	D1DKK5	D1DKK5_NEIGO	rplE	50S ribosomal protein L5	0.9997	12.8	2	2	0.07	Neisseria gonorrhoeae MS11
180	0.9996	D1DFU0	D1DFU0_NEIGO	NGFG_01378	Uncharacterized protein	0.9996	14.2	2	2	0.07	Neisseria gonorrhoeae MS11
181	0.9996	D1DKL8	D1DKL8_NEIGO	fusA	Elongation factor G	0.9996	3.7	2	2	0.07	Neisseria gonorrhoeae MS11
183	0.999	D1DK46	D1DK46_NEIGO	NGFG_02123	Type IV pilus assembly protein pilF	0.999	4.7	2	2	0.07	Neisseria gonorrhoeae MS11
184	0.9988	D1DKW8	D1DKW8_NEIGO	NGFG_01854	Ubiquinol-cytochrome c reductase iron-sulfur subunit	0.9988	13.5	2	2	0.07	Neisseria gonorrhoeae MS11
186	0.9985	D1DKR3	D1DKR3_NEIGO	NGFG_01802	Lipoprotein	0.9985	6.2	2	2	0.07	Neisseria gonorrhoeae MS11
187	0.998	D1DGF9	D1DGF9_NEIGO	NGFG_01597	Paraquat-inducible protein B	0.998	5.4	2	2	0.07	Neisseria gonorrhoeae MS11
188	0.9959	D1DJT9	D1DJT9_NEIGO	pyrG	CTP synthase	0.9959	4.6	2	2	0.07	Neisseria gonorrhoeae MS11
194	0.9875	D1DFU2	D1DFU2_NEIGO	NGFG_01380	Cell division protein FtsN	0.9875	7	1	2	0.07	Neisseria gonorrhoeae MS11
202	0.9875	D1DGM2	D1DGM2_NEIGO	NGFG_00049	Lipoprotein	0.9875	39.3	1	2	0.07	Neisseria gonorrhoeae MS11
213	0.9875	D1DI79	D1DI79_NEIGO	NGFG_00606	Prepilin-type N-terminal cleavage/methylation domain-containing protein	0.9875	5	1	2	0.07	Neisseria gonorrhoeae MS11
238	0.9864	D1DJE5	D1DJE5_NEIGO	NGFG_01022	Uncharacterized protein	0.9864	16.3	1	2	0.07	Neisseria gonorrhoeae MS11
276	0.9798	D1DKI9	D1DKI9_NEIGO	NGFG_01728	Site-determining protein	0.9798	5.2	1	2	0.07	Neisseria gonorrhoeae MS11
283	0.9732	D1DGS2	D1DGS2_NEIGO	NGFG_00099	ATP synthase subunit C	0.9732	14.1	1	2	0.07	Neisseria gonorrhoeae MS11
190	0.9875	D1DFA2	D1DFA2_NEIGO	NGFG_01190	Membrane-bound lytic murein transglycosylase D	0.9875	2.6	1	1	0.03	Neisseria gonorrhoeae MS11
191	0.9875	D1DFC7	D1DFC7_NEIGO	rpsF	30S ribosomal protein S6	0.9875	11.5	1	1	0.03	Neisseria gonorrhoeae MS11
192	0.9875	D1DFE3	D1DFE3_NEIGO	proS	Proline--tRNA ligase	0.9875	2.3	1	1	0.03	Neisseria gonorrhoeae MS11
193	0.9875	D1DFF2	D1DFF2_NEIGO	NGFG_01240	Uncharacterized protein	0.9875	7.5	1	1	0.03	Neisseria gonorrhoeae MS11
195	0.9875	D1DFU9	D1DFU9_NEIGO	NGFG_01387	Penicillin-binding protein 2	0.9875	2.1	1	1	0.03	Neisseria gonorrhoeae MS11
196	0.9875	D1DFZ1	D1DFZ1_NEIGO	NGFG_01429	N-acetylmuramoyl-L-alanine amidase AmiC	0.9875	4.1	1	1	0.03	Neisseria gonorrhoeae MS11
197	0.9875	D1DG41	D1DG41_NEIGO	NGFG_01479	Prepilin-type N-terminal cleavage/methylation domain-containing protein	0.9875	9.3	1	1	0.03	Neisseria gonorrhoeae MS11
198	0.9875	D1DG47	D1DG47_NEIGO	NGFG_01485	Cadmium resistance transporter	0.9875	5.9	1	1	0.03	Neisseria gonorrhoeae MS11
200	0.9875	D1DG61	D1DG61_NEIGO	NGFG_01499	Thiamine biosynthesis lipoprotein	0.9875	3.7	1	1	0.03	Neisseria gonorrhoeae MS11
201	0.9875	D1DGF8	D1DGF8_NEIGO	NGFG_01596	Uncharacterized protein	0.9875	6.4	1	1	0.03	Neisseria gonorrhoeae MS11
203	0.9875	D1DGP5	D1DGP5_NEIGO	NGFG_00072	ABC transporter substrate-binding protein virulence factor Mce	0.9875	9.1	1	1	0.03	Neisseria gonorrhoeae MS11
204	0.9875	D1DGS1	D1DGS1_NEIGO	atpB	ATP synthase subunit a	0.9875	4.2	1	1	0.03	Neisseria gonorrhoeae MS11
205	0.9875	D1DGS4	D1DGS4_NEIGO	atpH	ATP synthase subunit delta	0.9875	8.5	1	1	0.03	Neisseria gonorrhoeae MS11
206	0.9875	D1DH04	D1DH04_NEIGO	carB	Carbamoyl-phosphate synthase large chain	0.9875	1.7	1	1	0.03	Neisseria gonorrhoeae MS11
207	0.9875	D1DH58	D1DH58_NEIGO	NGFG_00235	Type IV pilus assembly protein PilN	0.9875	13.6	1	1	0.03	Neisseria gonorrhoeae MS11
208	0.9875	D1DHF1	D1DHF1_NEIGO	secF	Protein-export membrane protein SecF	0.9875	4.2	1	1	0.03	Neisseria gonorrhoeae MS11
209	0.9875	D1DHR3	D1DHR3_NEIGO	thrS	Threonine--tRNA ligase	0.9875	1.9	1	1	0.03	Neisseria gonorrhoeae MS11
210	0.9875	D1DHX1	D1DHX1_NEIGO	NGFG_00498	Twitching motility protein	0.9875	2.7	1	1	0.03	Neisseria gonorrhoeae MS11
211	0.9875	D1DHY2	D1DHY2_NEIGO	NGFG_00509	Uncharacterized protein	0.9875	9.3	1	1	0.03	Neisseria gonorrhoeae MS11
212	0.9875	D1DHY5	D1DHY5_NEIGO	NGFG_00512	Heme biosynthesis-associated protein HemY	0.9875	3.5	1	1	0.03	Neisseria gonorrhoeae MS11
214	0.9875	D1DI81	D1DI81_NEIGO	NGFG_00608	Type IV pilus assembly protein PilW	0.9875	4.2	1	1	0.03	Neisseria gonorrhoeae MS11
215	0.9875	D1DIT4	D1DIT4_NEIGO	NGFG_00811	Succinate dehydrogenase, flavoprotein subunit	0.9875	2.2	1	1	0.03	Neisseria gonorrhoeae MS11
216	0.9875	D1DJE7	D1DJE7_NEIGO	NGFG_01024	Peptidyl-prolyl cis-trans isomerase D	0.9875	3.3	1	1	0.03	Neisseria gonorrhoeae MS11
217	0.9875	D1DJL9	D1DJL9_NEIGO	NGFG_02167	Probable transcriptional regulatory protein NGFG_02167	0.9875	5.8	1	1	0.03	Neisseria gonorrhoeae MS11
218	0.9875	D1DJR6	D1DJR6_NEIGO	NGFG_01993	Magnesium transporter	0.9875	2.9	1	1	0.03	Neisseria gonorrhoeae MS11
219	0.9875	D1DJT0	D1DJT0_NEIGO	trpD	Anthranilate phosphoribosyltransferase	0.9875	6.1	1	1	0.03	Neisseria gonorrhoeae MS11
220	0.9875	D1DJT5	D1DJT5_NEIGO	uvrA	UvrABC system protein A	0.9875	1.6	1	1	0.03	Neisseria gonorrhoeae MS11
221	0.9875	D1DJW8	D1DJW8_NEIGO	NGFG_02045	Uncharacterized protein	0.9875	4.4	1	1	0.03	Neisseria gonorrhoeae MS11
222	0.9875	D1DJX9	D1DJX9_NEIGO	NGFG_02056	4-carboxymuconolactone decarboxylase	0.9875	18	1	1	0.03	Neisseria gonorrhoeae MS11
223	0.9875	D1DKH5	D1DKH5_NEIGO	NGFG_01714	RIP metalloprotease RseP	0.9875	3.4	1	1	0.03	Neisseria gonorrhoeae MS11
224	0.9875	D1DKJ3	D1DKJ3_NEIGO	rpsD	30S ribosomal protein S4	0.9875	8.3	1	1	0.03	Neisseria gonorrhoeae MS11
225	0.9875	D1DKJ9	D1DKJ9_NEIGO	rpmD	50S ribosomal protein L30	0.9875	21.3	1	1	0.03	Neisseria gonorrhoeae MS11
226	0.9875	D1DKK6	D1DKK6_NEIGO	rplX	50S ribosomal protein L24	0.9875	16.8	1	1	0.03	Neisseria gonorrhoeae MS11
227	0.9875	D1DL01	D1DL01_NEIGO	NGFG_01887	Integral membrane protein	0.9875	5.7	1	1	0.03	Neisseria gonorrhoeae MS11
229	0.9864	D1DF62	D1DF62_NEIGO	NGFG_01150	ATP-dependent RNA helicase	0.9864	2.8	1	1	0.03	Neisseria gonorrhoeae MS11
231	0.9864	D1DG26	D1DG26_NEIGO	NGFG_01464	Xaa-Pro aminopeptidase	0.9864	1.8	1	1	0.03	Neisseria gonorrhoeae MS11
232	0.9864	D1DGS5	D1DGS5_NEIGO	atpA	ATP synthase subunit alpha	0.9864	2.5	1	1	0.03	Neisseria gonorrhoeae MS11
233	0.9864	D1DHE9	D1DHE9_NEIGO	NGFG_00326	Preprotein translocase, YajC subunit	0.9864	17	1	1	0.03	Neisseria gonorrhoeae MS11
234	0.9864	D1DHI5	D1DHI5_NEIGO	NGFG_00362	MafB family adhesin protein	0.9864	2.2	1	1	0.03	Neisseria gonorrhoeae MS11
235	0.9864	D1DHZ1	D1DHZ1_NEIGO	NGFG_00518	DNA repair protein radA	0.9864	3.1	1	1	0.03	Neisseria gonorrhoeae MS11
236	0.9864	D1DIT8	D1DIT8_NEIGO	NGFG_00815	Oxoglutarate dehydrogenase (Succinyl-transferring), E1 component	0.9864	1.2	1	1	0.03	Neisseria gonorrhoeae MS11
237	0.9864	D1DJ16	D1DJ16_NEIGO	NGFG_00893	Uncharacterized protein	0.9864	17.9	1	1	0.03	Neisseria gonorrhoeae MS11
239	0.9864	D1DJW2	D1DJW2_NEIGO	ilvC	Ketol-acid reductoisomerase	0.9864	4.2	1	1	0.03	Neisseria gonorrhoeae MS11
240	0.9864	D1DJW5	D1DJW5_NEIGO	NGFG_02042	Acetolactate synthase	0.9864	2.4	1	1	0.03	Neisseria gonorrhoeae MS11
241	0.9864	D1DJW6	D1DJW6_NEIGO	NGFG_02043	Lipoprotein	0.9864	9.7	1	1	0.03	Neisseria gonorrhoeae MS11
242	0.9864	D1DK61	D1DK61_NEIGO	NGFG_02138	Outer membrane protein OmpU	0.9864	2.7	1	1	0.03	Neisseria gonorrhoeae MS11
243	0.9864	D1DKD4	D1DKD4_NEIGO	acpP	Acyl carrier protein	0.9864	17.9	1	1	0.03	Neisseria gonorrhoeae MS11
244	0.9864	T2A382	T2A382_NEIGO	NGFG_02457	Multidrug resistance efflux pump membrane protein A	0.9864	3.9	1	1	0.03	Neisseria gonorrhoeae MS11
245	0.9853	D1DFR2	D1DFR2_NEIGO,tr	NGFG_01350	MafB family adhesin protein	0.9853	3.1	1	1	0.03	Neisseria gonorrhoeae MS11	T2A3R2	T2A3R2_NEIGO
246	0.9853	D1DG04	D1DG04_NEIGO	speB	Agmatinase	0.9853	3.6	1	1	0.03	Neisseria gonorrhoeae MS11
247	0.9853	D1DG66	D1DG66_NEIGO	nqrC	Na(+)-translocating NADH-quinone reductase subunit C	0.9853	4.3	1	1	0.03	Neisseria gonorrhoeae MS11
248	0.9853	D1DH98	D1DH98_NEIGO	NGFG_00275	Peptidase Do	0.9853	3.2	1	1	0.03	Neisseria gonorrhoeae MS11
249	0.9853	D1DHD4	D1DHD4_NEIGO	rpsP	30S ribosomal protein S16	0.9853	13.6	1	1	0.03	Neisseria gonorrhoeae MS11
250	0.9853	D1DI83	D1DI83_NEIGO	NGFG_00610	Prepilin-type N-terminal cleavage/methylation domain-containing protein	0.9853	11.1	1	1	0.03	Neisseria gonorrhoeae MS11
251	0.9853	D1DK40	D1DK40_NEIGO	dapD	2,3,4,5-tetrahydropyridine-2,6-dicarboxylate N-succinyltransferase	0.9853	4.8	1	1	0.03	Neisseria gonorrhoeae MS11
252	0.9853	D1DKL2	D1DKL2_NEIGO	rplV	50S ribosomal protein L22	0.9853	19.3	1	1	0.03	Neisseria gonorrhoeae MS11
253	0.9853	T2A3E9	T2A3E9_NEIGO	htpX	Protease HtpX homolog	0.9853	5.7	1	1	0.03	Neisseria gonorrhoeae MS11
254	0.9842	D1DGT9	D1DGT9_NEIGO	NGFG_00116	3-oxoacyl-[acyl-carrier-protein] reductase	0.9842	4.4	1	1	0.03	Neisseria gonorrhoeae MS11
255	0.9842	D1DHN3	D1DHN3_NEIGO	NGFG_00410	Polar amino acid ABC transporter ATP-binding protein	0.9842	9.8	1	1	0.03	Neisseria gonorrhoeae MS11
256	0.9842	D1DHU1	D1DHU1_NEIGO	ubiE	Ubiquinone/menaquinone biosynthesis C-methyltransferase UbiE	0.9842	5.3	1	1	0.03	Neisseria gonorrhoeae MS11
257	0.9842	D1DIU7	D1DIU7_NEIGO	NGFG_00824	Uncharacterized protein	0.9842	6.9	1	1	0.03	Neisseria gonorrhoeae MS11
258	0.9842	D1DJ30	D1DJ30_NEIGO	accA	Acetyl-coenzyme A carboxylase carboxyl transferase subunit alpha	0.9842	3.5	1	1	0.03	Neisseria gonorrhoeae MS11
259	0.9842	D1DKI4	D1DKI4_NEIGO	valS	Valine--tRNA ligase	0.9842	1.3	1	1	0.03	Neisseria gonorrhoeae MS11
260	0.9842	D1DKS6	D1DKS6_NEIGO	dnaJ	Chaperone protein DnaJ	0.9842	2.9	1	1	0.03	Neisseria gonorrhoeae MS11
261	0.9831	D1DFQ1	D1DFQ1_NEIGO	NGFG_01339	Uncharacterized protein	0.9831	5.3	1	1	0.03	Neisseria gonorrhoeae MS11
262	0.9831	D1DG17	D1DG17_NEIGO	NGFG_01455	NAD(P) transhydrogenase subunit beta	0.9831	2	1	1	0.03	Neisseria gonorrhoeae MS11
263	0.9831	D1DIN1	D1DIN1_NEIGO	ackA	Acetate kinase	0.9831	3.3	1	1	0.03	Neisseria gonorrhoeae MS11
264	0.9831	D1DL91	D1DL91_NEIGO	NGFG_01977	Type IV pilus assembly protein PilC	0.9831	1.2	1	1	0.03	Neisseria gonorrhoeae MS11
265	0.9831	D1DL97	D1DL97_NEIGO	NGFG_01983	Pyrroline-5-carboxylate reductase	0.9831	3.4	1	1	0.03	Neisseria gonorrhoeae MS11
266	0.982	D1DK81	D1DK81_NEIGO	NGFG_01620	Uncharacterized protein	0.982	6.4	1	1	0.03	Neisseria gonorrhoeae MS11
267	0.982	D1DKQ3	D1DKQ3_NEIGO	pyrB	Aspartate carbamoyltransferase	0.982	4.2	1	1	0.03	Neisseria gonorrhoeae MS11
268	0.982	D1DKR4	D1DKR4_NEIGO	NGFG_01803	Sodium/glutamate symporter	0.982	3.7	1	1	0.03	Neisseria gonorrhoeae MS11
269	0.9809	D1DH10	D1DH10_NEIGO	carA	Carbamoyl-phosphate synthase small chain	0.9809	4.5	1	1	0.03	Neisseria gonorrhoeae MS11
270	0.9809	D1DIF2	D1DIF2_NEIGO	NGFG_00679	Fimbrial assembly protein FimB	0.9809	3.8	1	1	0.03	Neisseria gonorrhoeae MS11
271	0.9809	D1DJP0	D1DJP0_NEIGO,tr	NGFG_02194	Adhesin mafA 2/3	0.9809	4.2	1	1	0.03	Neisseria gonorrhoeae MS11	T2A3Z2	T2A3Z2_NEIGO
272	0.9809	D1DK51	D1DK51_NEIGO	NGFG_02128	UbiH/UbiF/VisC/COQ6 family ubiquinone biosynthesis hydroxylase	0.9809	3	1	1	0.03	Neisseria gonorrhoeae MS11
273	0.9809	D1DKV3	D1DKV3_NEIGO	glmS	Glutamine--fructose-6-phosphate aminotransferase [isomerizing]	0.9809	2.3	1	1	0.03	Neisseria gonorrhoeae MS11
274	0.9809	D1DKX8	D1DKX8_NEIGO	ppc	Phosphoenolpyruvate carboxylase	0.9809	1.2	1	1	0.03	Neisseria gonorrhoeae MS11
275	0.9809	D1DL75	D1DL75_NEIGO	NGFG_01961	Uncharacterized protein	0.9809	9.2	1	1	0.03	Neisseria gonorrhoeae MS11
277	0.9787	D1DKN2	D1DKN2_NEIGO	rplK	50S ribosomal protein L11	0.9787	9.7	1	1	0.03	Neisseria gonorrhoeae MS11
278	0.9776	D1DGZ2	D1DGZ2_NEIGO	NGFG_00169	Fructose-bisphosphate aldolase	0.9776	3.7	1	1	0.03	Neisseria gonorrhoeae MS11
279	0.9776	D1DJY1	D1DJY1_NEIGO	NGFG_02058	Uncharacterized protein	0.9776	6.7	1	1	0.03	Neisseria gonorrhoeae MS11
280	0.9776	D1DKJ2	D1DKJ2_NEIGO	rpoA	DNA-directed RNA polymerase subunit alpha	0.9776	3.4	1	1	0.03	Neisseria gonorrhoeae MS11
281	0.9765	D1DIU2	D1DIU2_NEIGO	sucC	Succinyl-CoA ligase [ADP-forming] subunit beta	0.9765	3.4	1	1	0.03	Neisseria gonorrhoeae MS11
282	0.9754	D1DEY6	D1DEY6_NEIGO	glk	Glucokinase	0.9754	3.7	1	1	0.03	Neisseria gonorrhoeae MS11
284	0.9732	D1DL94	D1DL94_NEIGO	NGFG_01980	Twitching motility protein	0.9732	4	1	1	0.03	Neisseria gonorrhoeae MS11
285	0.9721	D1DJM7	D1DJM7_NEIGO	NGFG_02175	Uncharacterized protein	0.9721	4.2	1	1	0.03	Neisseria gonorrhoeae MS11
286	0.9699	D1DKW6	D1DKW6_NEIGO	NGFG_01852	Cytochrome c1	0.9699	5.7	1	1	0.03	Neisseria gonorrhoeae MS11
287	0.9688	D1DHM9	D1DHM9_NEIGO	NGFG_00406	Cell division protein FtsN	0.9688	4.3	1	1	0.03	Neisseria gonorrhoeae MS11
288	0.9667	D1DHE4	D1DHE4_NEIGO	tatA	Sec-independent protein translocase protein TatA	0.9667	14.9	1	1	0.03	Neisseria gonorrhoeae MS11
289	0.9613	D1DHS3	D1DHS3_NEIGO	ihfA	Integration host factor subunit alpha	0.9613	9	1	1	0.03	Neisseria gonorrhoeae MS11
290	0.9571	D1DG33	D1DG33_NEIGO	NGFG_01471	Lactate permease (LctP) family transporter	0.9571	2.7	1	1	0.03	Neisseria gonorrhoeae MS11
291	0.955	D1DHP8	D1DHP8_NEIGO	NGFG_00425	Uncharacterized protein	0.955	22.3	1	1	0.03	Neisseria gonorrhoeae MS11
292	0.9539	D1DHN4	D1DHN4_NEIGO	NGFG_00411	Uncharacterized protein	0.9539	5.8	1	1	0.03	Neisseria gonorrhoeae MS11
293	0.9539	D1DL85	D1DL85_NEIGO	murA	UDP-N-acetylglucosamine 1-carboxyvinyltransferase	0.9539	2.4	1	1	0.03	Neisseria gonorrhoeae MS11
294	0.9518	D1DKX4	D1DKX4_NEIGO	rplM	50S ribosomal protein L13	0.9518	6.3	1	1	0.03	Neisseria gonorrhoeae MS11

## Sheet: Comparison
ID	Proteins name	Subcellualr	Go Annotation	Pure	Crude	Total	Sample
T2A392	Opacity protein	Outer membrane	cell outer membrane; integral component of membrane; porin activity	3		3	Pure Only
T2A3C9	Opacity protein	Outer membrane	cell outer membrane; integral component of membrane; porin activity	3		3	Pure Only
D1DH12	Chromosome partitioning ATPase			2		2	Pure Only
D1DIV2	3-phosphoshikimate 1-carboxyvinyltransferase (EC 2.5.1.19) (5-enolpyruvylshikimate-3-phosphate synthase)	Cytoplasm.	3-phosphoshikimate 1-carboxyvinyltransferase activity; aromatic amino acid family biosynthetic process; chorismate biosynthetic process; cytoplasm	2		2	Pure Only
D1DJ21	Chaperone protein HscA homolog	belongs to HSP70 family	ATP binding; ATPase activity; iron-sulfur cluster assembly; protein folding	2		2	Pure Only
D1DKK2	50S ribosomal protein L6		rRNA binding; ribosome; structural constituent of ribosome; translation	2		2	Pure Only
D1DFC4	50S ribosomal protein L9		rRNA binding; ribosome; structural constituent of ribosome; translation	1		1	Pure Only
D1DFS4	ABC transporter ATP-binding protein		ATP binding; ATPase activity	1		1	Pure Only
D1DGN7	Uncharacterized protein			1		1	Pure Only
D1DHQ0	Uncharacterized protein			1		1	Pure Only
D1DI89	Succinyldiaminopimelate transaminase		lysine biosynthetic process via diaminopimelate; pyridoxal phosphate binding; succinyldiaminopimelate transaminase activity	1		1	Pure Only
D1DIH6	Transglycosylase			1		1	Pure Only
D1DIQ5	Heme-utilization protein Hup	Cell outer membrane.	cell outer membrane; integral component of membrane; receptor activity; transporter activity	1		1	Pure Only
D1DJ17	Lipoprotein		outer membrane-bounded periplasmic space; protein transport	1		1	Pure Only
D1DJC9	Uncharacterized protein			1		1	Pure Only
D1DJD3	Homoserine dehydrogenase (EC 1.1.1.3)		NADP binding; amino acid binding; homoserine dehydrogenase activity; isoleucine biosynthetic process; methionine biosynthetic process; threonine biosynthetic process	1		1	Pure Only
D1DJS8	Sulfatase		sulfuric ester hydrolase activity	1		1	Pure Only
D1DKM0	30S ribosomal protein S12		rRNA binding; small ribosomal subunit; structural constituent of ribosome; tRNA binding; translation	1		1	Pure Only
D1DKV4	Methionine--tRNA ligase (EC 6.1.1.10) (Methionyl-tRNA synthetase)	Cytoplasm.	ATP binding; cytoplasm; metal ion binding; methionine-tRNA ligase activity; methionyl-tRNA aminoacylation; tRNA binding	1		1	Pure Only
D1DGB6	Membrane fusion protein mtrC		membrane; transmembrane transport		16	16	Crude Only
D1DFE4	Pyruvate dehydrogenase E1 component (EC 1.2.4.1)		pyruvate dehydrogenase (acetyl-transferring) activity		15	15	Crude Only
D1DGM9	Adhesion and penetration protein		outer membrane; serine-type endopeptidase activity		15	15	Crude Only
T2A269	Polyribonucleotide nucleotidyltransferase (EC 2.7.7.8) (Polynucleotide phosphorylase)	Cytoplasm.	3'-5'-exoribonuclease activity; RNA binding; RNA processing; cytoplasm; mRNA catabolic process; magnesium ion binding; polyribonucleotide nucleotidyltransferase activity		13	13	Crude Only
D1DKF8	Ribonuclease E (RNase E) (EC 3.1.26.12)	Cytoplasm. Cell inner membrane; Peripheral membrane protein; Cytoplasmic side.	RNA binding; cytoplasm; cytoplasmic side of plasma membrane; endoribonuclease activity; mRNA catabolic process; magnesium ion binding; rRNA processing; ribonuclease E activity; tRNA processing; zinc ion binding		12	12	Crude Only
D1DFF6	Uncharacterized protein				9	9	Crude Only
D1DGI7	Pilin pilS1c456		cell adhesion; pilus		9	9	Crude Only
D1DFE5	Dihydrolipoyllysine-residue acetyltransferase		dihydrolipoyllysine-residue acetyltransferase activity; glycolytic process; pyruvate dehydrogenase complex		7	7	Crude Only
D1DFW2	Cell division protein ftsA		cell cycle; cell division; regulation of cell shape		7	7	Crude Only
D1DGB7	Hydrophobe/amphiphile efflux-1 (HAE1) family RND transporter		integral component of membrane; transporter activity		7	7	Crude Only
D1DGS7	ATP synthase subunit beta (EC 3.6.3.14) (ATP synthase F1 sector subunit beta) (F-ATPase subunit beta)	Cell membrane; Peripheral membrane protein.	ATP binding; ATP hydrolysis coupled proton transport; plasma membrane; plasma membrane ATP synthesis coupled proton transport; proton-transporting ATP synthase activity, rotational mechanism; proton-transporting ATP synthase complex, catalytic core F(1)		7	7	Crude Only
D1DH59	Type IV pilus assembly protein PilM				7	7	Crude Only
D1DH60	Penicillin-binding protein 1A		penicillin binding; peptidase activity; peptidoglycan biosynthetic process; response to antibiotic; transferase activity, transferring pentosyl groups		7	7	Crude Only
D1DHF9	Phosphoenolpyruvate synthase (PEP synthase) (EC 2.7.9.2) (Pyruvate, water dikinase)		ATP binding; gluconeogenesis; metal ion binding; pyruvate metabolic process; pyruvate, water dikinase activity		7	7	Crude Only
D1DFZ9	Phospholipase A1		lipid metabolic process; membrane; phospholipase activity		6	6	Crude Only
D1DHE7	Zinc-binding alcohol dehydrogenase		oxidoreductase activity; zinc ion binding		6	6	Crude Only
D1DHN9	IgA-specific serine endopeptidase autotransporter		serine-type endopeptidase activity		6	6	Crude Only
D1DHZ6	Amino acid ABC transporter substrate-binding protein		outer membrane-bounded periplasmic space; transporter activity		6	6	Crude Only
D1DJ97	Uncharacterized protein				6	6	Crude Only
D1DKM7	DNA-directed RNA polymerase subunit beta (RNAP subunit beta) (EC 2.7.7.6) (RNA polymerase subunit beta) (Transcriptase subunit beta)		DNA binding; DNA-directed RNA polymerase activity; ribonucleoside binding; transcription, DNA-templated		6	6	Crude Only
D1DH57	Type IV pilus assembly protein PilO				5	5	Crude Only
D1DIN0	Thiol:disulfide interchange protein DsbD (EC 1.8.1.8) (Protein-disulfide reductase)	Cell inner membrane; Multi-pass membrane protein.	cell redox homeostasis; cytochrome complex assembly; electron carrier activity; integral component of membrane; plasma membrane; protein-disulfide reductase activity		5	5	Crude Only
D1DK35	Uncharacterized protein				5	5	Crude Only
D1DKN1	50S ribosomal protein L1		large ribosomal subunit; rRNA binding; regulation of translation; structural constituent of ribosome; tRNA binding; translation		5	5	Crude Only
D1DF93	Enolase (EC 4.2.1.11) (2-phospho-D-glycerate hydro-lyase) (2-phosphoglycerate dehydratase)	Cytoplasm. Secreted. Cell surface.	cell surface; extracellular region; glycolytic process; magnesium ion binding; phosphopyruvate hydratase activity; phosphopyruvate hydratase complex		4	4	Crude Only
D1DG20	NAD(P) transhydrogenase subunit alpha (EC 1.6.1.2)		NAD(P)+ transhydrogenase (AB-specific) activity; nucleotide binding; proton transport		4	4	Crude Only
D1DGA8	Cytochrome c oxidase, cbb3-type, subunit II		aerobic respiration; cytochrome-c oxidase activity; heme binding; integral component of membrane; iron ion binding		4	4	Crude Only
D1DGB0	Cytochrome c oxidase, cbb3-type, subunit III		electron carrier activity; heme binding; iron ion binding		4	4	Crude Only
D1DHJ6	Cell division protein ZipA	Cell inner membrane; Single-pass type I membrane protein.	barrier septum assembly; integral component of membrane; plasma membrane		4	4	Crude Only
D1DI07	ATP-dependent zinc metalloprotease FtsH (EC 3.4.24.-)	Cell membrane; Multi-pass membrane protein; Cytoplasmic side.	ATP binding; ATPase activity; cell division; integral component of membrane; metalloendopeptidase activity; plasma membrane; protein catabolic process; zinc ion binding		4	4	Crude Only
D1DK89	Thiol:disulfide interchange protein DsbA		cell redox homeostasis		4	4	Crude Only
D1DKL7	50S ribosomal protein L3		rRNA binding; ribosome; structural constituent of ribosome; translation		4	4	Crude Only
D1DKT5	Pilin pilE		cell adhesion; pilus		4	4	Crude Only
T2A2B7	Uncharacterized protein				4	4	Crude Only
T2A2N7	MafB family adhesin protein				4	4	Crude Only
D1DFB7	Trigger factor (TF) (EC 5.2.1.8) (PPIase)	Cytoplasm.	cell cycle; cell division; cytoplasm; peptidyl-prolyl cis-trans isomerase activity; protein folding; protein transport		3	3	Crude Only
D1DFE6	Dihydrolipoyl dehydrogenase		cell redox homeostasis; dihydrolipoyl dehydrogenase activity; flavin adenine dinucleotide binding		3	3	Crude Only
D1DFP8	Glutamine synthetase (EC 6.3.1.2)	Cytoplasm.	ATP binding; cytoplasm; glutamate-ammonia ligase activity; glutamine biosynthetic process; nitrogen fixation		3	3	Crude Only
D1DFT7	Uncharacterized protein		cell outer membrane; integral component of membrane; plasma membrane		3	3	Crude Only
D1DG01	Aspartate--tRNA ligase (EC 6.1.1.12) (Aspartyl-tRNA synthetase)	Cytoplasm.	ATP binding; aspartate-tRNA ligase activity; aspartyl-tRNA aminoacylation; cytoplasm; nucleic acid binding		3	3	Crude Only
D1DG42	Efflux transporter, RND family, MFP subunit		membrane; transmembrane transport		3	3	Crude Only
D1DGC3	Glutamate dehydrogenase		cellular amino acid metabolic process; oxidoreductase activity, acting on the CH-NH2 group of donors, NAD or NADP as acceptor		3	3	Crude Only
D1DGV4	Membrane protein insertase YidC (Foldase YidC) (Membrane integrase YidC) (Membrane protein YidC)	Cell membrane; Multi-pass membrane protein.	integral component of membrane; plasma membrane; protein insertion into membrane; protein transport		3	3	Crude Only
D1DH56	Type IV pilus assembly protein PilP				3	3	Crude Only
D1DHF0	Protein translocase subunit SecD	Cell membrane; Multi-pass membrane protein.	P-P-bond-hydrolysis-driven protein transmembrane transporter activity; integral component of membrane; intracellular; intracellular protein transmembrane transport; plasma membrane; protein targeting; protein transport by the Sec complex		3	3	Crude Only
D1DHG4	Putrescine-binding periplasmic protein	Periplasm.	periplasmic space; polyamine binding; polyamine transport		3	3	Crude Only
D1DHW8	Signal peptidase I		integral component of membrane; serine-type peptidase activity		3	3	Crude Only
D1DHY4	Uncharacterized protein				3	3	Crude Only
D1DI80	Type IV pilus modification protein PilV				3	3	Crude Only
D1DID0	Cytochrome c		electron carrier activity; electron transport chain; heme binding; iron ion binding; periplasmic space		3	3	Crude Only
D1DJ01	DNA translocase ftsK 2		ATP binding; DNA binding; cell cycle; cell division; chromosome segregation; integral component of membrane		3	3	Crude Only
D1DJ64	Outer membrane protein		membrane		3	3	Crude Only
D1DJT3	TonB-dependent receptor	Cell outer membrane.	cell outer membrane; receptor activity; transporter activity		3	3	Crude Only
D1DK08	Histidine-binding protein		outer membrane-bounded periplasmic space; transporter activity		3	3	Crude Only
D1DK42	Type IV pilus assembly protein PilC	Membrane; Multi-pass membrane protein.	integral component of membrane; protein secretion		3	3	Crude Only
D1DK75	Uncharacterized protein				3	3	Crude Only
D1DKK4	30S ribosomal protein S14		rRNA binding; ribosome; structural constituent of ribosome; translation		3	3	Crude Only
D1DKL6	50S ribosomal protein L4		rRNA binding; ribosome; structural constituent of ribosome; translation		3	3	Crude Only
D1DKL9	30S ribosomal protein S7		rRNA binding; small ribosomal subunit; structural constituent of ribosome; tRNA binding; translation		3	3	Crude Only
D1DL19	Uncharacterized protein				3	3	Crude Only
D1DL68	Electron transfer flavoprotein beta subunit ETFB		electron carrier activity		3	3	Crude Only
D1DL72	Glyceraldehyde-3-phosphate dehydrogenase		NAD binding; NADP binding; glucose metabolic process; oxidoreductase activity, acting on the aldehyde or oxo group of donors, NAD or NADP as acceptor		3	3	Crude Only
D1DF35	3-isopropylmalate dehydrogenase (EC 1.1.1.85) (3-IPM-DH) (Beta-IPM dehydrogenase)	Cytoplasm.	3-isopropylmalate dehydrogenase activity; NAD binding; cytoplasm; leucine biosynthetic process; magnesium ion binding		2	2	Crude Only
D1DF67	ATP-dependent Clp protease ATP-binding subunit ClpX		ATP binding; nucleoside-triphosphatase activity; peptidase activity; protein folding; zinc ion binding		2	2	Crude Only
D1DFA6	30S ribosomal protein S1		RNA binding; ribosome; structural constituent of ribosome; translation		2	2	Crude Only
D1DFU0	Uncharacterized protein				2	2	Crude Only
D1DFU3	Thiol:disulfide interchange protein	Periplasm.	cell redox homeostasis; periplasmic space		2	2	Crude Only
D1DG40	Alcohol dehydrogenase, propanol-preferring		oxidoreductase activity; zinc ion binding		2	2	Crude Only
D1DG43	Macrolide export ATP-binding/permease MacB	Cell inner membrane; Multi-pass membrane protein.	ATP binding; ATPase activity; hydrolase activity, acting on acid anhydrides, catalyzing transmembrane movement of substances; integral component of membrane; plasma membrane; response to antibiotic		2	2	Crude Only
D1DG63	Na(+)-translocating NADH-quinone reductase subunit F (Na(+)-NQR subunit F) (Na(+)-translocating NQR subunit F) (EC 1.6.5.-) (NQR complex subunit F) (NQR-1 subunit F)	Cell inner membrane. Cell membrane.	2 iron, 2 sulfur cluster binding; Gram-negative-bacterium-type cell wall; electron carrier activity; integral component of membrane; metal ion binding; oxidoreductase activity, acting on NAD(P)H, quinone or similar compound as acceptor; plasma membrane; sodium ion transport		2	2	Crude Only
D1DGA7	Cytochrome c oxidase, cbb3-type, subunit I		aerobic respiration; cytochrome-c oxidase activity; heme binding; integral component of membrane; iron ion binding; plasma membrane respiratory chain complex IV		2	2	Crude Only
D1DGF9	Paraquat-inducible protein B				2	2	Crude Only
D1DHK9	Uncharacterized protein				2	2	Crude Only
D1DHU7	RNA-binding protein Hfq		RNA binding; regulation of transcription, DNA-templated; response to stress		2	2	Crude Only
D1DI65	Outer-membrane lipoprotein lolB		cell outer membrane; protein transport		2	2	Crude Only
D1DIC9	CMP-N-acetylneuraminate-beta-galactosamide-alpha-2,3-sialyltransferase		transferase activity, transferring glycosyl groups		2	2	Crude Only
D1DIG7	Chaperone ClpB	Cytoplasm.	ATP binding; cytoplasm; nucleoside-triphosphatase activity; protein processing; response to heat		2	2	Crude Only
D1DII4	Ferredoxin		integral component of membrane; iron-sulfur cluster binding		2	2	Crude Only
D1DIT5	Succinate dehydrogenase and fumarate reductase iron-sulfur protein		electron carrier activity; iron-sulfur cluster binding; oxidoreductase activity; tricarboxylic acid cycle		2	2	Crude Only
D1DIT9	2-oxoglutarate dehydrogenase E2 component (Dihydrolipoamide succinyltransferase)		dihydrolipoyllysine-residue succinyltransferase activity; oxoglutarate dehydrogenase complex; tricarboxylic acid cycle		2	2	Crude Only
D1DIU0	Dihydrolipoyl dehydrogenase (EC 1.8.1.4)		cell redox homeostasis; dihydrolipoyl dehydrogenase activity; flavin adenine dinucleotide binding		2	2	Crude Only
D1DIW3	Uncharacterized protein				2	2	Crude Only
D1DIZ3	Uncharacterized protein				2	2	Crude Only
D1DJG6	DNA polymerase III, subunit gamma and tau		ATP binding; DNA binding; DNA polymerase III complex; DNA-directed DNA polymerase activity; nucleoside-triphosphatase activity		2	2	Crude Only
D1DJG8	Protein RecA (Recombinase A)	Cytoplasm.	ATP binding; DNA recombination; DNA repair; DNA-dependent ATPase activity; SOS response; cytoplasm; damaged DNA binding; single-stranded DNA binding		2	2	Crude Only
D1DJK6	Copper-containing nitrite reductase		copper ion binding; nitrite reductase (NO-forming) activity; nitrogen compound metabolic process		2	2	Crude Only
D1DJW0	Aconitate hydratase 2 (EC 4.2.1.3) (EC 4.2.1.99) (2-methylisocitrate dehydratase)		2-methylisocitrate dehydratase activity; 4 iron, 4 sulfur cluster binding; aconitate hydratase activity; cytosol; metal ion binding; tricarboxylic acid cycle		2	2	Crude Only
D1DJY4	Putrescine-binding periplasmic protein	Periplasm.	periplasmic space; polyamine binding; polyamine transport		2	2	Crude Only
D1DJY5	Alanine--tRNA ligase (EC 6.1.1.7) (Alanyl-tRNA synthetase)	Cytoplasm.	ATP binding; alanine-tRNA ligase activity; alanyl-tRNA aminoacylation; cytoplasm; tRNA binding; zinc ion binding		2	2	Crude Only
D1DK46	Type IV pilus assembly protein pilF		ATP binding; nucleoside-triphosphatase activity; pilus assembly; protein transporter activity		2	2	Crude Only
D1DKC6	Uncharacterized protein		catalytic activity		2	2	Crude Only
D1DKD9	Catalase (EC 1.11.1.6)		catalase activity; heme binding; hydrogen peroxide catabolic process; metal ion binding		2	2	Crude Only
D1DKE5	DNA gyrase subunit B (EC 5.99.1.3)	Cytoplasm.	ATP binding; DNA binding; DNA topoisomerase type II (ATP-hydrolyzing) activity; DNA topological change; DNA-dependent DNA replication; chromosome; cytoplasm; magnesium ion binding		2	2	Crude Only
D1DKK7	50S ribosomal protein L14		large ribosomal subunit; rRNA binding; structural constituent of ribosome; translation		2	2	Crude Only
D1DKL1	30S ribosomal protein S3		mRNA binding; rRNA binding; small ribosomal subunit; structural constituent of ribosome; translation		2	2	Crude Only
D1DKL5	50S ribosomal protein L23		nucleotide binding; rRNA binding; ribosome; structural constituent of ribosome; translation		2	2	Crude Only
D1DKR3	Lipoprotein				2	2	Crude Only
D1DKT0	Pilin pilS1c12		cell adhesion; pilus		2	2	Crude Only
D1DKU1	ABC transporter periplasmic binding protein, thiB subfamily		outer membrane-bounded periplasmic space; thiamine binding; thiamine transport; transporter activity		2	2	Crude Only
D1DKW8	Ubiquinol-cytochrome c reductase iron-sulfur subunit (EC 1.10.2.2)		2 iron, 2 sulfur cluster binding; membrane; metal ion binding; ubiquinol-cytochrome-c reductase activity		2	2	Crude Only
D1DKX3	30S ribosomal protein S9		ribosome; structural constituent of ribosome; translation		2	2	Crude Only
D1DKZ7	Uncharacterized protein				2	2	Crude Only
D1DL16	Uncharacterized protein				2	2	Crude Only
D1DL38	Signal peptide peptidase SppA, 36K type		peptidase activity		2	2	Crude Only
D1DL48	Outer membrane protein		outer membrane		2	2	Crude Only
D1DL67	Electron transfer flavoprotein alpha subunit EtfA		electron carrier activity; flavin adenine dinucleotide binding		2	2	Crude Only
T2A4I6	Pilin pilS6c1		cell adhesion; pilus		2	2	Crude Only
D1DEY6	Glucokinase (EC 2.7.1.2) (Glucose kinase)	Cytoplasm.	ATP binding; cytoplasm; glucokinase activity; glycolytic process		1	1	Crude Only
D1DF62	ATP-dependent RNA helicase		ATP binding; ATP-dependent helicase activity; nucleic acid binding		1	1	Crude Only
D1DFA2	Membrane-bound lytic murein transglycosylase D		cell wall macromolecule catabolic process		1	1	Crude Only
D1DFF2	Uncharacterized protein				1	1	Crude Only
D1DFQ1	Uncharacterized protein				1	1	Crude Only
D1DFR2	MafB family adhesin protein				1	1	Crude Only
D1DFU2	Cell division protein FtsN		cell division		1	1	Crude Only
D1DFU9	Penicillin-binding protein 2		penicillin binding		1	1	Crude Only
D1DG04	Agmatinase (EC 3.5.3.11) (Agmatine ureohydrolase)		agmatinase activity; manganese ion binding; putrescine biosynthetic process from arginine; spermidine biosynthetic process		1	1	Crude Only
D1DG17	NAD(P) transhydrogenase subunit beta (EC 1.6.1.2) (Nicotinamide nucleotide transhydrogenase subunit beta)		NAD(P)+ transhydrogenase (AB-specific) activity; NADP binding; integral component of membrane; plasma membrane		1	1	Crude Only
D1DG26	Xaa-Pro aminopeptidase		aminopeptidase activity		1	1	Crude Only
D1DG33	Lactate permease (LctP) family transporter		integral component of plasma membrane; lactate transmembrane transporter activity		1	1	Crude Only
D1DG41	Prepilin-type N-terminal cleavage/methylation domain-containing protein				1	1	Crude Only
D1DG47	Cadmium resistance transporter				1	1	Crude Only
D1DG55	Putative iron-sulfur cluster insertion protein ErpA		iron ion binding; iron-sulfur cluster assembly; iron-sulfur cluster binding; structural molecule activity		1	1	Crude Only
D1DG61	Thiamine biosynthesis lipoprotein		periplasmic space; thiamine biosynthetic process		1	1	Crude Only
D1DG66	Na(+)-translocating NADH-quinone reductase subunit C (Na(+)-NQR subunit C) (Na(+)-translocating NQR subunit C) (EC 1.6.5.-) (NQR complex subunit C) (NQR-1 subunit C)	Cell membrane.	FMN binding; Gram-negative-bacterium-type cell wall; integral component of membrane; oxidoreductase activity, acting on NAD(P)H, quinone or similar compound as acceptor; plasma membrane; sodium ion transport		1	1	Crude Only
D1DGF8	Uncharacterized protein				1	1	Crude Only
D1DGM2	Lipoprotein				1	1	Crude Only
D1DGP5	ABC transporter substrate-binding protein virulence factor Mce				1	1	Crude Only
D1DGS1	ATP synthase subunit a (ATP synthase F0 sector subunit a) (F-ATPase subunit 6)	Cell membrane; Multi-pass membrane protein. Membrane; Multi-pass membrane protein.	integral component of membrane; plasma membrane; plasma membrane ATP synthesis coupled proton transport; proton-transporting ATP synthase activity, rotational mechanism; proton-transporting ATP synthase complex, coupling factor F(o)		1	1	Crude Only
D1DGS2	ATP synthase subunit C		ATP hydrolysis coupled proton transport; ATP synthesis coupled proton transport; hydrogen ion transmembrane transporter activity; integral component of membrane; plasma membrane; proton-transporting ATP synthase complex, coupling factor F(o)		1	1	Crude Only
D1DGS4	ATP synthase subunit delta (ATP synthase F(1) sector subunit delta) (F-type ATPase subunit delta)	Cell membrane; Peripheral membrane protein.	plasma membrane; plasma membrane ATP synthesis coupled proton transport; proton-transporting ATP synthase activity, rotational mechanism; proton-transporting ATP synthase complex, catalytic core F(1)		1	1	Crude Only
D1DGS5	ATP synthase subunit alpha (EC 3.6.3.14) (ATP synthase F1 sector subunit alpha) (F-ATPase subunit alpha)	Cell membrane; Peripheral membrane protein.	ATP binding; ATP hydrolysis coupled proton transport; plasma membrane; plasma membrane ATP synthesis coupled proton transport; proton-transporting ATP synthase activity, rotational mechanism; proton-transporting ATP synthase complex, catalytic core F(1); proton-transporting ATPase activity, rotational mechanism		1	1	Crude Only
D1DGT9	3-oxoacyl-[acyl-carrier-protein] reductase		3-oxoacyl-[acyl-carrier-protein] reductase (NADPH) activity; NAD binding; fatty acid biosynthetic process		1	1	Crude Only
D1DGZ2	Fructose-bisphosphate aldolase		fructose-bisphosphate aldolase activity; glycolytic process; zinc ion binding		1	1	Crude Only
D1DH04	Carbamoyl-phosphate synthase large chain (EC 6.3.5.5) (Carbamoyl-phosphate synthetase ammonia chain)		'de novo' UMP biosynthetic process; ATP binding; arginine biosynthetic process; carbamoyl-phosphate synthase (glutamine-hydrolyzing) activity; magnesium ion binding; manganese ion binding		1	1	Crude Only
D1DH10	Carbamoyl-phosphate synthase small chain (EC 6.3.5.5) (Carbamoyl-phosphate synthetase glutamine chain)		'de novo' UMP biosynthetic process; ATP binding; arginine biosynthetic process; carbamoyl phosphate biosynthetic process; carbamoyl-phosphate synthase (glutamine-hydrolyzing) activity; glutamine catabolic process		1	1	Crude Only
D1DH58	Type IV pilus assembly protein PilN				1	1	Crude Only
D1DH98	Peptidase Do		serine-type endopeptidase activity		1	1	Crude Only
D1DHD4	30S ribosomal protein S16		ribosome; structural constituent of ribosome; translation		1	1	Crude Only
D1DHE4	Sec-independent protein translocase protein TatA	Cell membrane; Single-pass membrane protein.	TAT protein transport complex; integral component of plasma membrane; protein secretion; protein transmembrane transporter activity; protein transport by the Tat complex		1	1	Crude Only
D1DHE9	Preprotein translocase, YajC subunit				1	1	Crude Only
D1DHF1	Protein-export membrane protein SecF	Cell membrane; Multi-pass membrane protein.	P-P-bond-hydrolysis-driven protein transmembrane transporter activity; integral component of membrane; intracellular; intracellular protein transmembrane transport; plasma membrane; protein targeting; protein transport by the Sec complex		1	1	Crude Only
D1DHN3	Polar amino acid ABC transporter ATP-binding protein		ATP binding; ATPase activity		1	1	Crude Only
D1DHP8	Uncharacterized protein				1	1	Crude Only
D1DHR3	Threonine--tRNA ligase (EC 6.1.1.3) (Threonyl-tRNA synthetase)	Cytoplasm.	ATP binding; cytoplasm; metal ion binding; threonine-tRNA ligase activity; threonyl-tRNA aminoacylation		1	1	Crude Only
D1DHS3	Integration host factor subunit alpha (IHF-alpha)		DNA binding; DNA recombination; regulation of transcription, DNA-templated; regulation of translation; transcription, DNA-templated		1	1	Crude Only
D1DHU1	Ubiquinone/menaquinone biosynthesis C-methyltransferase UbiE (EC 2.1.1.163) (EC 2.1.1.201) (2-methoxy-6-polyprenyl-1,4-benzoquinol methylase) (Demethylmenaquinone methyltransferase)		menaquinone biosynthetic process; methyltransferase activity; ubiquinone biosynthetic process		1	1	Crude Only
D1DHY2	Uncharacterized protein				1	1	Crude Only
D1DHY5	Heme biosynthesis-associated protein HemY		heme metabolic process; membrane		1	1	Crude Only
D1DHZ1	DNA repair protein radA		ATP binding; DNA repair; DNA-dependent ATPase activity; damaged DNA binding; metal ion binding		1	1	Crude Only
D1DI79	Prepilin-type N-terminal cleavage/methylation domain-containing protein		protein secretion by the type II secretion system; protein transporter activity; type II protein secretion system complex		1	1	Crude Only
D1DI81	Type IV pilus assembly protein PilW				1	1	Crude Only
D1DIF2	Fimbrial assembly protein FimB				1	1	Crude Only
D1DIN1	Acetate kinase (EC 2.7.2.1) (Acetokinase)	Cytoplasm.	ATP binding; acetate kinase activity; acetyl-CoA biosynthetic process; cytoplasm; magnesium ion binding; organic acid metabolic process		1	1	Crude Only
D1DIT4	Succinate dehydrogenase, flavoprotein subunit		electron transport chain; flavin adenine dinucleotide binding; oxidoreductase activity, acting on the CH-CH group of donors; tricarboxylic acid cycle		1	1	Crude Only
D1DIT8	Oxoglutarate dehydrogenase (Succinyl-transferring), E1 component		oxoglutarate dehydrogenase (succinyl-transferring) activity; thiamine pyrophosphate binding; tricarboxylic acid cycle		1	1	Crude Only
D1DIU7	Uncharacterized protein				1	1	Crude Only
D1DJ16	Uncharacterized protein				1	1	Crude Only
D1DJ30	Acetyl-coenzyme A carboxylase carboxyl transferase subunit alpha (ACCase subunit alpha) (Acetyl-CoA carboxylase carboxyltransferase subunit alpha) (EC 6.4.1.2)	Cytoplasm.	ATP binding; acetyl-CoA carboxylase activity; acetyl-CoA carboxylase complex; fatty acid biosynthetic process; malonyl-CoA biosynthetic process; transferase activity		1	1	Crude Only
D1DJE5	Uncharacterized protein				1	1	Crude Only
D1DJE7	Peptidyl-prolyl cis-trans isomerase D		isomerase activity		1	1	Crude Only
D1DJL9	Probable transcriptional regulatory protein NGFG_02167	Cytoplasm.	DNA binding; cytoplasm; regulation of transcription, DNA-templated; transcription, DNA-templated		1	1	Crude Only
D1DJM7	Uncharacterized protein				1	1	Crude Only
D1DJR6	Magnesium transporter		adenyl nucleotide binding; magnesium ion transmembrane transporter activity; membrane		1	1	Crude Only
D1DJT0	Anthranilate phosphoribosyltransferase (EC 2.4.2.18)		anthranilate phosphoribosyltransferase activity; magnesium ion binding; tryptophan biosynthetic process		1	1	Crude Only
D1DJW2	Ketol-acid reductoisomerase (EC 1.1.1.86) (Acetohydroxy-acid isomeroreductase) (Alpha-keto-beta-hydroxylacyl reductoisomerase)		coenzyme binding; isoleucine biosynthetic process; isomerase activity; ketol-acid reductoisomerase activity; valine biosynthetic process		1	1	Crude Only
D1DJW5	Acetolactate synthase (EC 2.2.1.6)		acetolactate synthase activity; flavin adenine dinucleotide binding; isoleucine biosynthetic process; magnesium ion binding; thiamine pyrophosphate binding; valine biosynthetic process		1	1	Crude Only
D1DJW6	Lipoprotein				1	1	Crude Only
D1DJW8	Uncharacterized protein				1	1	Crude Only
D1DJX9	4-carboxymuconolactone decarboxylase		peroxidase activity; peroxiredoxin activity		1	1	Crude Only
D1DJY1	Uncharacterized protein				1	1	Crude Only
D1DK40	2,3,4,5-tetrahydropyridine-2,6-dicarboxylate N-succinyltransferase (EC 2.3.1.117) (Tetrahydrodipicolinate N-succinyltransferase)	Cytoplasm.	2,3,4,5-tetrahydropyridine-2,6-dicarboxylate N-succinyltransferase activity; cytoplasm; diaminopimelate biosynthetic process; lysine biosynthetic process via diaminopimelate		1	1	Crude Only
D1DK51	UbiH/UbiF/VisC/COQ6 family ubiquinone biosynthesis hydroxylase		flavin adenine dinucleotide binding; oxidoreductase activity, acting on paired donors, with incorporation or reduction of molecular oxygen, NAD(P)H as one donor, and incorporation of one atom of oxygen; ubiquinone biosynthetic process		1	1	Crude Only
D1DK61	Outer membrane protein OmpU				1	1	Crude Only
D1DK81	Uncharacterized protein				1	1	Crude Only
D1DKD4	Acyl carrier protein (ACP)	Cytoplasm.	ACP phosphopantetheine attachment site binding involved in fatty acid biosynthetic process; cytoplasm		1	1	Crude Only
D1DKH5	RIP metalloprotease RseP		integral component of membrane; metalloendopeptidase activity; plasma membrane		1	1	Crude Only
D1DKI4	Valine--tRNA ligase (EC 6.1.1.9) (Valyl-tRNA synthetase)	Cytoplasm.	ATP binding; aminoacyl-tRNA editing activity; cytoplasm; valine-tRNA ligase activity; valyl-tRNA aminoacylation		1	1	Crude Only
D1DKI9	Site-determining protein		ATP binding; ATPase activity; barrier septum site selection		1	1	Crude Only
D1DKJ2	DNA-directed RNA polymerase subunit alpha (RNAP subunit alpha) (EC 2.7.7.6) (RNA polymerase subunit alpha) (Transcriptase subunit alpha)		DNA binding; DNA-directed RNA polymerase activity; transcription, DNA-templated		1	1	Crude Only
D1DKJ3	30S ribosomal protein S4		rRNA binding; small ribosomal subunit; structural constituent of ribosome; translation		1	1	Crude Only
D1DKJ9	50S ribosomal protein L30		large ribosomal subunit; structural constituent of ribosome; translation		1	1	Crude Only
D1DKK6	50S ribosomal protein L24		rRNA binding; ribosome; structural constituent of ribosome; translation		1	1	Crude Only
D1DKL2	50S ribosomal protein L22		large ribosomal subunit; rRNA binding; structural constituent of ribosome; translation		1	1	Crude Only
D1DKN2	50S ribosomal protein L11		LSU rRNA binding; ribosome; structural constituent of ribosome; translation		1	1	Crude Only
D1DKQ3	Aspartate carbamoyltransferase (EC 2.1.3.2) (Aspartate transcarbamylase)		'de novo' UMP biosynthetic process; 'de novo' pyrimidine nucleobase biosynthetic process; amino acid binding; aspartate carbamoyltransferase activity; cellular amino acid metabolic process		1	1	Crude Only
D1DKR4	Sodium/glutamate symporter		glutamate:sodium symporter activity; integral component of membrane		1	1	Crude Only
D1DKS6	Chaperone protein DnaJ	Cytoplasm.	ATP binding; DNA replication; cytoplasm; protein folding; response to heat; zinc ion binding		1	1	Crude Only
D1DKV3	Glutamine--fructose-6-phosphate aminotransferase [isomerizing] (EC 2.6.1.16) (D-fructose-6-phosphate amidotransferase) (GFAT) (Glucosamine-6-phosphate synthase) (Hexosephosphate aminotransferase) (L-glutamine--D-fructose-6-phosphate amidotransferase)	Cytoplasm.	carbohydrate binding; carbohydrate biosynthetic process; cytoplasm; glutamine metabolic process; glutamine-fructose-6-phosphate transaminase (isomerizing) activity		1	1	Crude Only
D1DKW6	Cytochrome c1		electron carrier activity; heme binding; iron ion binding		1	1	Crude Only
D1DKX8	Phosphoenolpyruvate carboxylase (PEPC) (PEPCase) (EC 4.1.1.31)		carbon fixation; magnesium ion binding; oxaloacetate metabolic process; phosphoenolpyruvate carboxylase activity; tricarboxylic acid cycle		1	1	Crude Only
D1DL01	Integral membrane protein				1	1	Crude Only
D1DL61	Lipoprotein				1	1	Crude Only
D1DL75	Uncharacterized protein				1	1	Crude Only
D1DL85	UDP-N-acetylglucosamine 1-carboxyvinyltransferase (EC 2.5.1.7) (Enoylpyruvate transferase) (UDP-N-acetylglucosamine enolpyruvyl transferase)	Cytoplasm.	UDP-N-acetylgalactosamine biosynthetic process; UDP-N-acetylglucosamine 1-carboxyvinyltransferase activity; cell cycle; cell division; cytoplasm; peptidoglycan biosynthetic process; regulation of cell shape		1	1	Crude Only
D1DL91	Type IV pilus assembly protein PilC				1	1	Crude Only
D1DL94	Twitching motility protein		ATP binding; nucleoside-triphosphatase activity; transport		1	1	Crude Only
D1DL97	Pyrroline-5-carboxylate reductase		proline biosynthetic process; pyrroline-5-carboxylate reductase activity		1	1	Crude Only
T2A382	Multidrug resistance efflux pump membrane protein A		membrane; transmembrane transport		1	1	Crude Only
T2A3E9	Protease HtpX homolog (EC 3.4.24.-)	Cell membrane; Multi-pass membrane protein.	integral component of membrane; metalloendopeptidase activity; plasma membrane; response to stress; zinc ion binding		1	1	Crude Only
D1DKI6	Major outer membrane protein P.IB	Cell outer membrane; Multi-pass membrane protein.	cell outer membrane; ion transport; plasma membrane; pore complex; porin activity	31	45	76
D1DGL7	60 kDa chaperonin (GroEL protein) (Protein Cpn60)	Cytoplasm.	ATP binding; cytoplasm; protein refolding	26	34	60
D1DFR9	Outer membrane protein P.III		cell outer membrane; integral component of membrane; plasma membrane	20	24	44
D1DKP9	LysM protein		cell wall macromolecule catabolic process	11	24	35
D1DH55	Type IV pilus biogenesis and competence protein pilQ	Cell outer membrane.	cell outer membrane; pilus assembly; protein secretion; protein transporter activity	14	18	32
D1DKH6	Outer membrane protein assembly factor BamA	Cell outer membrane.	Gram-negative-bacterium-type cell outer membrane assembly; cell outer membrane; integral component of membrane; plasma membrane; protein insertion into membrane	9	19	28
D1DIQ9	Lipoprotein			9	15	24
D1DK29	Uncharacterized protein		peptidyl-prolyl cis-trans isomerase activity; protein folding	7	16	23
T2A4H1	Elongation factor Tu (EF-Tu)	Cytoplasm.	GTP binding; GTPase activity; cytoplasm; translation elongation factor activity	8	14	22
D1DIF6	Lipoprotein NlpD		cell wall macromolecule catabolic process	6	14	20
D1DGR2	Soluble lytic murein transglycosylase		hydrolase activity, hydrolyzing O-glycosyl compounds; periplasmic space	5	12	17
D1DGR6	Lipoprotein			7	9	16
D1DL15	Phospholipid-binding protein			8	8	16
D1DGB8	NodT family efflux transporter, outer membrane factor (OMF) lipoprotein		lipid binding; membrane; transporter activity	1	14	15
D1DI47	Uncharacterized protein			10	4	14
D1DK86	Peptidyl-prolyl cis-trans isomerase SurA		peptidyl-prolyl cis-trans isomerase activity; protein folding	6	8	14
D1DJV5	Peptidyl-prolyl cis-trans isomerase (EC 5.2.1.8)		peptidyl-prolyl cis-trans isomerase activity; protein folding	2	11	13
D1DFW3	Cell division protein FtsZ	Cytoplasm.	GTP binding; GTPase activity; barrier septum assembly; cell division site; cytokinesis by binary fission; cytoplasm; protein complex; protein polymerization	1	11	12
D1DG52	Chaperone protein DnaK (HSP70) (Heat shock 70 kDa protein) (Heat shock protein 70)		ATP binding; protein folding; response to stress	2	10	12
D1DFB4	Type IV pilus biogenesis/stability protein PilW			3	8	11
D1DFD6	C-terminal processing peptidase		serine-type peptidase activity	3	8	11
D1DHH6	Major ferric iron-binding protein		transporter activity	3	8	11
D1DIE8	Lipoprotein			4	6	10
D1DHP1	Outer membrane protein assembly factor BamD	Cell outer membrane.	Gram-negative-bacterium-type cell outer membrane assembly; cell outer membrane; protein insertion into membrane	4	5	9
D1DJI4	Opacity protein		cell outer membrane; integral component of membrane; porin activity	5	4	9
D1DJI9	Adhesin mafA			3	6	9
D1DFD4	Carbonic anhydrase		carbonate dehydratase activity; one-carbon metabolic process; zinc ion binding	2	6	8
D1DFD7	Metallopeptidase			5	3	8
D1DFZ7	Putrescine-binding periplasmic protein	Periplasm.	periplasmic space; polyamine binding; polyamine transport	1	7	8
D1DHJ2	Opacity protein		cell outer membrane; integral component of membrane; porin activity	2	6	8
D1DIS9	Peroxiredoxin		cell redox homeostasis; electron carrier activity; protein disulfide oxidoreductase activity	1	7	8
D1DL93	Twitching motility protein		ATP binding; nucleoside-triphosphatase activity; transport	2	6	8
D1DIZ2	Uncharacterized protein			3	4	7
D1DK87	LPS-assembly protein LptD	Cell outer membrane.	Gram-negative-bacterium-type cell outer membrane assembly; cell outer membrane; lipopolysaccharide transport; plasma membrane; response to organic substance	3	4	7
D1DKF2	Outer membrane protein assembly factor BamE	Cell outer membrane; Lipid-anchor.	Gram-negative-bacterium-type cell outer membrane assembly; cell outer membrane; plasma membrane; protein insertion into membrane	3	4	7
D1DKU2	Uncharacterized protein		hydrolase activity	2	5	7
T2A2L7	ComEA protein		DNA binding; DNA repair	2	5	7
D1DF85	Lytic murein transglycosylase B			2	4	6
D1DGF3	Cytochrome c		electron carrier activity; heme binding; iron ion binding	1	5	6
D1DIL2	Outer membrane protein H.8		copper ion binding; electron carrier activity	1	5	6
D1DJK4	Muramoyltetrapeptide carboxypeptidase		carboxypeptidase activity	2	4	6
D1DL24	30S ribosomal protein S2		small ribosomal subunit; structural constituent of ribosome; translation	3	3	6
D1DF73	L-lactate dehydrogenase		FMN binding; oxidoreductase activity	1	4	5
D1DFP3	Lipopolysaccharide transport periplasmic protein LptA		lipopolysaccharide binding; lipopolysaccharide transport; periplasmic space	1	4	5
D1DGP8	Lipoprotein		membrane	1	4	5
D1DGS3	ATP synthase subunit b (ATP synthase F(0) sector subunit b) (ATPase subunit I) (F-type ATPase subunit b)	Cell membrane; Single-pass membrane protein.	integral component of membrane; plasma membrane; plasma membrane ATP synthesis coupled proton transport; proton-transporting ATP synthase activity, rotational mechanism; proton-transporting ATP synthase complex, coupling factor F(o)	1	4	5
D1DHC8	Zinc/manganese ABC transporter substrate-binding protein		cell adhesion; metal ion binding; metal ion transport	1	4	5
D1DHW3	Cysteine synthase (EC 2.5.1.47)		cysteine biosynthetic process from serine; cysteine synthase activity	2	3	5
D1DI40	Uncharacterized protein			3	2	5
D1DJ53	Inosine-5'-monophosphate dehydrogenase (IMP dehydrogenase) (IMPD) (IMPDH) (EC 1.1.1.205)		GMP biosynthetic process; IMP dehydrogenase activity; adenyl nucleotide binding; metal ion binding	2	3	5
D1DJL4	Translation initiation factor IF-2	Cytoplasm.	GTP binding; GTPase activity; cytoplasm; translation initiation factor activity	2	3	5
D1DKH7	Outer membrane protein OmpH			1	4	5
D1DKL4	50S ribosomal protein L2		large ribosomal subunit; rRNA binding; structural constituent of ribosome; transferase activity; translation	1	4	5
D1DKT8	Peptide methionine sulfoxide reductase msrA/msrB		peptide-methionine (R)-S-oxide reductase activity; peptide-methionine (S)-S-oxide reductase activity; protein repair; response to oxidative stress	2	3	5
D1DKV0	Membrane-bound lytic murein transglycosylase A		hydrolase activity, hydrolyzing O-glycosyl compounds; outer membrane; peptidoglycan turnover	2	3	5
D1DL54	Phospholipase patatin family protein		lipid metabolic process	2	3	5
D1DFZ1	N-acetylmuramoyl-L-alanine amidase AmiC		N-acetylmuramoyl-L-alanine amidase activity; peptidoglycan catabolic process	3	1	4
D1DG44	Thiol:disulfide interchange protein DsbC			2	2	4
D1DHF8	Transcription termination factor Rho (EC 3.6.4.-) (ATP-dependent helicase Rho)		ATP binding; DNA-templated transcription, termination; RNA binding; RNA-dependent ATPase activity; helicase activity; regulation of transcription, DNA-templated	1	3	4
D1DHP6	LPS-assembly lipoprotein LptE	Cell outer membrane; Lipid-anchor.	Gram-negative-bacterium-type cell outer membrane assembly; outer membrane	1	3	4
D1DIG4	Uncharacterized protein			1	3	4
D1DJT9	CTP synthase (EC 6.3.4.2) (CTP synthetase) (UTP--ammonia ligase)		'de novo' CTP biosynthetic process; ATP binding; CTP synthase activity; glutamine metabolic process	2	2	4
D1DKJ5	30S ribosomal protein S13		rRNA binding; ribosome; structural constituent of ribosome; tRNA binding; translation	2	2	4
D1DKL0	50S ribosomal protein L16		rRNA binding; ribosome; structural constituent of ribosome; tRNA binding; translation	1	3	4
D1DKL8	Elongation factor G (EF-G)	Cytoplasm.	GTP binding; GTPase activity; cytoplasm; translation elongation factor activity	2	2	4
D1DFC7	30S ribosomal protein S6		rRNA binding; ribosome; structural constituent of ribosome; translation	2	1	3
D1DFE8	Uncharacterized protein			1	2	3
D1DHG3	Outer-membrane lipoprotein carrier protein	Periplasm.	lipoprotein transporter activity; periplasmic space	1	2	3
D1DI43	Uncharacterized protein			1	2	3
D1DIK8	Protein translocase subunit SecA	Cell membrane; Peripheral membrane protein; Cytoplasmic side. Cytoplasm.	ATP binding; cytoplasm; intracellular protein transmembrane transport; metal ion binding; plasma membrane; protein import; protein targeting	1	2	3
D1DIU2	Succinyl-CoA ligase [ADP-forming] subunit beta (EC 6.2.1.5) (Succinyl-CoA synthetase subunit beta)		ATP binding; magnesium ion binding; manganese ion binding; succinate-CoA ligase (ADP-forming) activity; tricarboxylic acid cycle	2	1	3
D1DJ57	Bacterioferritin		cellular iron ion homeostasis; ferric iron binding; iron ion transport	1	2	3
D1DJP0	Adhesin mafA 2/3			2	1	3
D1DJX1	Imidazoleglycerol-phosphate dehydratase (EC 4.2.1.19)	Cytoplasm.	cytoplasm; histidine biosynthetic process; imidazoleglycerol-phosphate dehydratase activity	1	2	3
D1DKK0	30S ribosomal protein S5		rRNA binding; small ribosomal subunit; structural constituent of ribosome; translation	1	2	3
D1DKK5	50S ribosomal protein L5		rRNA binding; ribosome; structural constituent of ribosome; tRNA binding; translation	1	2	3
D1DFE3	Proline--tRNA ligase (EC 6.1.1.15) (Prolyl-tRNA synthetase)	Cytoplasm.	ATP binding; aminoacyl-tRNA editing activity; cytoplasm; proline-tRNA ligase activity; prolyl-tRNA aminoacylation	1	1	2
D1DFZ8	30S ribosomal protein S20		rRNA binding; ribosome; structural constituent of ribosome; translation	1	1	2
D1DHI5	MafB family adhesin protein			1	1	2
D1DHM9	Cell division protein FtsN		cell division	1	1	2
D1DHN4	Uncharacterized protein			1	1	2
D1DHX1	Twitching motility protein		ATP binding; transport	1	1	2
D1DI83	Prepilin-type N-terminal cleavage/methylation domain-containing protein		protein secretion by the type II secretion system; protein transporter activity; type II protein secretion system complex	1	1	2
D1DJT5	UvrABC system protein A (UvrA protein) (Excinuclease ABC subunit A)	Cytoplasm.	ATP binding; ATPase activity; DNA binding; SOS response; cytoplasm; excinuclease ABC activity; excinuclease repair complex; nucleotide-excision repair; zinc ion binding	1	1	2
D1DKX4	50S ribosomal protein L13		ribosome; structural constituent of ribosome; translation	1	1	2
T2A343	Opacity protein		cell outer membrane; integral component of membrane; porin activity	0	1	1
T2A2J6	Opacity protein		cell outer membrane; integral component of membrane; porin activity	0	0	0
T2A2P2	Opacity protein		cell outer membrane; integral component of membrane; porin activity	0		0
T2A3R4	Opacity protein		cell outer membrane; integral component of membrane; porin activity	0		0
T2A3Z8	Opacity protein		cell outer membrane; integral component of membrane; porin activity	0		0
T2A4E5	Opacity protein		cell outer membrane; integral component of membrane; porin activity	0		0
D1DIE5	MafB family adhesin protein				0	0
D1DKT3	Pilin pilEuss2		cell adhesion; pilus		0	0
T2A362	Pilin pilS7		cell adhesion; pilus		0	0
T2A3A7	Pilin pilS1c3		cell adhesion; pilus		0	0
T2A431	Pilin pilS2c1		cell adhesion; pilus		0	0

## Sheet: Info
Entry	Entry name	Status	Protein names	Gene names	Organism	Length	Subcellular location	Gene ontology (GO)	InterPro
D1DJI9	D1DJI9_NEIGO	unreviewed	Adhesin mafA	NGFG_02217 NGFG_02219	Neisseria gonorrhoeae MS11	320
T2A4H1	T2A4H1_NEIGO	unreviewed	Elongation factor Tu (EF-Tu)	tuf NGFG_02465 NGFG_02466	Neisseria gonorrhoeae MS11	394	Cytoplasm.	GTP binding; GTPase activity; cytoplasm; translation elongation factor activity	IPR000795; IPR027417; IPR005225; IPR009000; IPR009001; IPR004161; IPR004541; IPR004160;
T2A2L7	T2A2L7_NEIGO	unreviewed	ComEA protein	NGFG_02391 NGFG_02409 NGFG_02458 NGFG_02471	Neisseria gonorrhoeae MS11	99		DNA binding; DNA repair	IPR004509; IPR000445; IPR003583; IPR010994;
D1DH98	D1DH98_NEIGO	unreviewed	Peptidase Do	NGFG_00275	Neisseria gonorrhoeae MS11	499		serine-type endopeptidase activity	IPR001478; IPR011782; IPR001940; IPR009003;
D1DF62	D1DF62_NEIGO	unreviewed	ATP-dependent RNA helicase	NGFG_01150	Neisseria gonorrhoeae MS11	462		ATP binding; ATP-dependent helicase activity; nucleic acid binding	IPR011545; IPR014001; IPR001650; IPR027417; IPR000629; IPR014014;
D1DKH5	D1DKH5_NEIGO	unreviewed	RIP metalloprotease RseP	NGFG_01714	Neisseria gonorrhoeae MS11	446		integral component of membrane; metalloendopeptidase activity; plasma membrane	IPR001478; IPR004387; IPR008915;
D1DKM7	D1DKM7_NEIGO	unreviewed	DNA-directed RNA polymerase subunit beta (RNAP subunit beta) (EC 2.7.7.6) (RNA polymerase subunit beta) (Transcriptase subunit beta)	rpoB NGFG_01766	Neisseria gonorrhoeae MS11	1392		DNA binding; DNA-directed RNA polymerase activity; ribonucleoside binding; transcription, DNA-templated	IPR010243; IPR019462; IPR015712; IPR007120; IPR007121; IPR007644; IPR007642; IPR007645; IPR007641; IPR014724;
D1DG01	D1DG01_NEIGO	unreviewed	Aspartate--tRNA ligase (EC 6.1.1.12) (Aspartyl-tRNA synthetase)	aspS NGFG_01439	Neisseria gonorrhoeae MS11	602	Cytoplasm.	ATP binding; aspartate-tRNA ligase activity; aspartyl-tRNA aminoacylation; cytoplasm; nucleic acid binding	IPR004364; IPR018150; IPR006195; IPR004524; IPR002312; IPR004115; IPR012340; IPR004365;
D1DGA8	D1DGA8_NEIGO	unreviewed	Cytochrome c oxidase, cbb3-type, subunit II	NGFG_01546	Neisseria gonorrhoeae MS11	203		aerobic respiration; cytochrome-c oxidase activity; heme binding; integral component of membrane; iron ion binding	IPR009056; IPR000883; IPR003468;
D1DKK2	D1DKK2_NEIGO	unreviewed	50S ribosomal protein L6	rplF NGFG_01741	Neisseria gonorrhoeae MS11	177		rRNA binding; ribosome; structural constituent of ribosome; translation	IPR000702; IPR020040; IPR019906; IPR002358;
D1DFE6	D1DFE6_NEIGO	unreviewed	Dihydrolipoyl dehydrogenase	NGFG_01234	Neisseria gonorrhoeae MS11	594		cell redox homeostasis; dihydrolipoyl dehydrogenase activity; flavin adenine dinucleotide binding	IPR003016; IPR000089; IPR016156; IPR013027; IPR006258; IPR004099; IPR023753; IPR012999; IPR001327; IPR011053;
D1DFD6	D1DFD6_NEIGO	unreviewed	C-terminal processing peptidase	NGFG_01224	Neisseria gonorrhoeae MS11	491		serine-type peptidase activity	IPR001478; IPR004447; IPR005151;
D1DHW8	D1DHW8_NEIGO	unreviewed	Signal peptidase I	NGFG_00495	Neisseria gonorrhoeae MS11	339		integral component of membrane; serine-type peptidase activity	IPR000223; IPR019757; IPR028360; IPR019759; IPR015927; IPR019533;
D1DGM9	D1DGM9_NEIGO	unreviewed	Adhesion and penetration protein	NGFG_00056	Neisseria gonorrhoeae MS11	1464		outer membrane; serine-type endopeptidase activity	IPR005546; IPR006315; IPR012332; IPR011050; IPR018114; IPR000710; IPR004899;
D1DKI9	D1DKI9_NEIGO	unreviewed	Site-determining protein	NGFG_01728	Neisseria gonorrhoeae MS11	271		ATP binding; ATPase activity; barrier septum site selection	IPR002586; IPR025501; IPR010223; IPR027417;
D1DKL9	D1DKL9_NEIGO	unreviewed	30S ribosomal protein S7	rpsG NGFG_01758	Neisseria gonorrhoeae MS11	156		rRNA binding; small ribosomal subunit; structural constituent of ribosome; tRNA binding; translation	IPR000235; IPR005717; IPR020606; IPR023798;
D1DHP6	D1DHP6_NEIGO	unreviewed	LPS-assembly lipoprotein LptE	lptE NGFG_00423	Neisseria gonorrhoeae MS11	159	Cell outer membrane; Lipid-anchor.	Gram-negative-bacterium-type cell outer membrane assembly; outer membrane	IPR007485;
D1DIG7	D1DIG7_NEIGO	unreviewed	Chaperone ClpB	NGFG_00694	Neisseria gonorrhoeae MS11	859	Cytoplasm.	ATP binding; cytoplasm; nucleoside-triphosphatase activity; protein processing; response to heat	IPR003593; IPR003959; IPR017730; IPR019489; IPR004176; IPR001270; IPR018368; IPR028299; IPR023150; IPR027417;
D1DKI4	D1DKI4_NEIGO	unreviewed	Valine--tRNA ligase (EC 6.1.1.9) (Valyl-tRNA synthetase)	valS NGFG_01723	Neisseria gonorrhoeae MS11	945	Cytoplasm.	ATP binding; aminoacyl-tRNA editing activity; cytoplasm; valine-tRNA ligase activity; valyl-tRNA aminoacylation	IPR001412; IPR002300; IPR014729; IPR010978; IPR009080; IPR013155; IPR019499; IPR009008; IPR002303;
D1DL24	D1DL24_NEIGO	unreviewed	30S ribosomal protein S2	rpsB NGFG_01910	Neisseria gonorrhoeae MS11	242		small ribosomal subunit; structural constituent of ribosome; translation	IPR001865; IPR005706; IPR018130; IPR023591;
D1DJT0	D1DJT0_NEIGO	unreviewed	Anthranilate phosphoribosyltransferase (EC 2.4.2.18)	trpD NGFG_02007	Neisseria gonorrhoeae MS11	342		anthranilate phosphoribosyltransferase activity; magnesium ion binding; tryptophan biosynthetic process	IPR005940; IPR000312; IPR017459;
D1DHN9	D1DHN9_NEIGO	unreviewed	IgA-specific serine endopeptidase autotransporter	NGFG_00416	Neisseria gonorrhoeae MS11	1532		serine-type endopeptidase activity	IPR005546; IPR012332; IPR011050; IPR000710; IPR004899;
T2A3E9	T2A3E9_NEIGO	unreviewed	Protease HtpX homolog (EC 3.4.24.-)	htpX NGFG_02284	Neisseria gonorrhoeae MS11	279	Cell membrane; Multi-pass membrane protein.	integral component of membrane; metalloendopeptidase activity; plasma membrane; response to stress; zinc ion binding	IPR022919; IPR001915;
D1DK40	D1DK40_NEIGO	unreviewed	2,3,4,5-tetrahydropyridine-2,6-dicarboxylate N-succinyltransferase (EC 2.3.1.117) (Tetrahydrodipicolinate N-succinyltransferase)	dapD NGFG_02117	Neisseria gonorrhoeae MS11	273	Cytoplasm.	2,3,4,5-tetrahydropyridine-2,6-dicarboxylate N-succinyltransferase activity; cytoplasm; diaminopimelate biosynthetic process; lysine biosynthetic process via diaminopimelate	IPR005664; IPR001451; IPR018357; IPR023180; IPR011004;
D1DJY5	D1DJY5_NEIGO	unreviewed	Alanine--tRNA ligase (EC 6.1.1.7) (Alanyl-tRNA synthetase)	alaS NGFG_02062	Neisseria gonorrhoeae MS11	885	Cytoplasm.	ATP binding; alanine-tRNA ligase activity; alanyl-tRNA aminoacylation; cytoplasm; tRNA binding; zinc ion binding	IPR002318; IPR018162; IPR018165; IPR018164; IPR023033; IPR003156; IPR018163; IPR009000; IPR012947;
D1DGA7	D1DGA7_NEIGO	unreviewed	Cytochrome c oxidase, cbb3-type, subunit I	NGFG_01545	Neisseria gonorrhoeae MS11	477		aerobic respiration; cytochrome-c oxidase activity; heme binding; integral component of membrane; iron ion binding; plasma membrane respiratory chain complex IV	IPR000883; IPR023615; IPR023616; IPR004677;
D1DI07	D1DI07_NEIGO	unreviewed	ATP-dependent zinc metalloprotease FtsH (EC 3.4.24.-)	ftsH NGFG_00534	Neisseria gonorrhoeae MS11	655	Cell membrane; Multi-pass membrane protein; Cytoplasmic side.	ATP binding; ATPase activity; cell division; integral component of membrane; metalloendopeptidase activity; plasma membrane; protein catabolic process; zinc ion binding	IPR003593; IPR003959; IPR003960; IPR005936; IPR027417; IPR011546; IPR000642;
D1DHG3	D1DHG3_NEIGO	unreviewed	Outer-membrane lipoprotein carrier protein	lolA NGFG_00340	Neisseria gonorrhoeae MS11	207	Periplasm.	lipoprotein transporter activity; periplasmic space	IPR004564; IPR018323;
D1DL38	D1DL38_NEIGO	unreviewed	Signal peptide peptidase SppA, 36K type	NGFG_01924	Neisseria gonorrhoeae MS11	328		peptidase activity	IPR002142;
D1DJW0	D1DJW0_NEIGO	unreviewed	Aconitate hydratase 2 (EC 4.2.1.3) (EC 4.2.1.99) (2-methylisocitrate dehydratase)	NGFG_02037	Neisseria gonorrhoeae MS11	861		2-methylisocitrate dehydratase activity; 4 iron, 4 sulfur cluster binding; aconitate hydratase activity; cytosol; metal ion binding; tricarboxylic acid cycle	IPR015931; IPR015937; IPR001030; IPR015928; IPR015932; IPR018136; IPR004406; IPR015933; IPR015929;
D1DK87	D1DK87_NEIGO	unreviewed	LPS-assembly protein LptD	lptD NGFG_01626	Neisseria gonorrhoeae MS11	801	Cell outer membrane.	Gram-negative-bacterium-type cell outer membrane assembly; cell outer membrane; lipopolysaccharide transport; plasma membrane; response to organic substance	IPR020889; IPR007543;
D1DHM9	D1DHM9_NEIGO	unreviewed	Cell division protein FtsN	NGFG_00406	Neisseria gonorrhoeae MS11	346		cell division	IPR011930; IPR007730;
D1DJ64	D1DJ64_NEIGO	unreviewed	Outer membrane protein	NGFG_00941	Neisseria gonorrhoeae MS11	315		membrane	IPR001107; IPR028514; IPR001972;
D1DFU2	D1DFU2_NEIGO	unreviewed	Cell division protein FtsN	NGFG_01380	Neisseria gonorrhoeae MS11	287		cell division	IPR011930; IPR007730;
D1DJ53	D1DJ53_NEIGO	unreviewed	Inosine-5'-monophosphate dehydrogenase (IMP dehydrogenase) (IMPD) (IMPDH) (EC 1.1.1.205)	guaB NGFG_00930	Neisseria gonorrhoeae MS11	487		GMP biosynthetic process; IMP dehydrogenase activity; adenyl nucleotide binding; metal ion binding	IPR013785; IPR000644; IPR005990; IPR015875; IPR001093;
D1DF67	D1DF67_NEIGO	unreviewed	ATP-dependent Clp protease ATP-binding subunit ClpX	clpX NGFG_01155	Neisseria gonorrhoeae MS11	414		ATP binding; nucleoside-triphosphatase activity; peptidase activity; protein folding; zinc ion binding	IPR003593; IPR003959; IPR019489; IPR004487; IPR027417; IPR010603;
D1DJ30	D1DJ30_NEIGO	unreviewed	Acetyl-coenzyme A carboxylase carboxyl transferase subunit alpha (ACCase subunit alpha) (Acetyl-CoA carboxylase carboxyltransferase subunit alpha) (EC 6.4.1.2)	accA NGFG_00907	Neisseria gonorrhoeae MS11	317	Cytoplasm.	ATP binding; acetyl-CoA carboxylase activity; acetyl-CoA carboxylase complex; fatty acid biosynthetic process; malonyl-CoA biosynthetic process; transferase activity	IPR001095; IPR011763;
D1DHY4	D1DHY4_NEIGO	unreviewed	Uncharacterized protein	NGFG_00511	Neisseria gonorrhoeae MS11	444			IPR007470;
D1DI43	D1DI43_NEIGO	unreviewed	Uncharacterized protein	NGFG_00570	Neisseria gonorrhoeae MS11	107
D1DHZ1	D1DHZ1_NEIGO	unreviewed	DNA repair protein radA	NGFG_00518	Neisseria gonorrhoeae MS11	459		ATP binding; DNA repair; DNA-dependent ATPase activity; damaged DNA binding; metal ion binding	IPR003593; IPR004504; IPR027417; IPR020588; IPR020568; IPR014721;
D1DJ01	D1DJ01_NEIGO	unreviewed	DNA translocase ftsK 2	NGFG_00878	Neisseria gonorrhoeae MS11	1014		ATP binding; DNA binding; cell cycle; cell division; chromosome segregation; integral component of membrane	IPR002543; IPR018541; IPR027417;
D1DJ17	D1DJ17_NEIGO	unreviewed	Lipoprotein	NGFG_00894	Neisseria gonorrhoeae MS11	223		outer membrane-bounded periplasmic space; protein transport	IPR005534; IPR007195;
D1DJT3	D1DJT3_NEIGO	unreviewed	TonB-dependent receptor	NGFG_02010	Neisseria gonorrhoeae MS11	758	Cell outer membrane.	cell outer membrane; receptor activity; transporter activity	IPR012910; IPR000531;
D1DJW6	D1DJW6_NEIGO	unreviewed	Lipoprotein	NGFG_02043	Neisseria gonorrhoeae MS11	217			IPR003782; IPR012336;
D1DJL4	D1DJL4_NEIGO	unreviewed	Translation initiation factor IF-2	infB NGFG_02162	Neisseria gonorrhoeae MS11	943	Cytoplasm.	GTP binding; GTPase activity; cytoplasm; translation initiation factor activity	IPR009061; IPR000795; IPR006847; IPR027417; IPR005225; IPR000178; IPR015760; IPR023115; IPR009000; IPR004161;
D1DIS9	D1DIS9_NEIGO	unreviewed	Peroxiredoxin	NGFG_00806	Neisseria gonorrhoeae MS11	245		cell redox homeostasis; electron carrier activity; protein disulfide oxidoreductase activity	IPR002109; IPR011906; IPR014025; IPR013740; IPR012336;
D1DFP8	D1DFP8_NEIGO	unreviewed	Glutamine synthetase (EC 6.3.1.2)	NGFG_01336	Neisseria gonorrhoeae MS11	472	Cytoplasm.	ATP binding; cytoplasm; glutamate-ammonia ligase activity; glutamine biosynthetic process; nitrogen fixation	IPR008147; IPR014746; IPR008146; IPR027303; IPR004809; IPR001637; IPR027302;
D1DFU0	D1DFU0_NEIGO	unreviewed	Uncharacterized protein	NGFG_01378	Neisseria gonorrhoeae MS11	106			IPR007475;
D1DG63	D1DG63_NEIGO	unreviewed	Na(+)-translocating NADH-quinone reductase subunit F (Na(+)-NQR subunit F) (Na(+)-translocating NQR subunit F) (EC 1.6.5.-) (NQR complex subunit F) (NQR-1 subunit F)	nqrF NGFG_01501	Neisseria gonorrhoeae MS11	405	Cell inner membrane. Cell membrane.	2 iron, 2 sulfur cluster binding; Gram-negative-bacterium-type cell wall; electron carrier activity; integral component of membrane; metal ion binding; oxidoreductase activity, acting on NAD(P)H, quinone or similar compound as acceptor; plasma membrane; sodium ion transport	IPR001041; IPR012675; IPR017927; IPR010205; IPR008333; IPR001433; IPR017938;
D1DG44	D1DG44_NEIGO	unreviewed	Thiol:disulfide interchange protein DsbC	NGFG_01482	Neisseria gonorrhoeae MS11	261			IPR018950; IPR009094; IPR012336;
D1DFR2	D1DFR2_NEIGO	unreviewed	MafB family adhesin protein	NGFG_01350	Neisseria gonorrhoeae MS11	484			IPR008106;
D1DKJ2	D1DKJ2_NEIGO	unreviewed	DNA-directed RNA polymerase subunit alpha (RNAP subunit alpha) (EC 2.7.7.6) (RNA polymerase subunit alpha) (Transcriptase subunit alpha)	rpoA NGFG_01731	Neisseria gonorrhoeae MS11	328		DNA binding; DNA-directed RNA polymerase activity; transcription, DNA-templated	IPR011262; IPR011263; IPR011773; IPR009025; IPR011260;
D1DGB8	D1DGB8_NEIGO	unreviewed	NodT family efflux transporter, outer membrane factor (OMF) lipoprotein	NGFG_01556	Neisseria gonorrhoeae MS11	467		lipid binding; membrane; transporter activity	IPR003423; IPR010131;
D1DGL7	D1DGL7_NEIGO	unreviewed	60 kDa chaperonin (GroEL protein) (Protein Cpn60)	groL groEL NGFG_00044	Neisseria gonorrhoeae MS11	544	Cytoplasm.	ATP binding; cytoplasm; protein refolding	IPR018370; IPR001844; IPR002423; IPR027409; IPR027413;
D1DKL4	D1DKL4_NEIGO	unreviewed	50S ribosomal protein L2	rplB NGFG_01753	Neisseria gonorrhoeae MS11	277		large ribosomal subunit; rRNA binding; structural constituent of ribosome; transferase activity; translation	IPR012340; IPR022666; IPR014722; IPR002171; IPR005880; IPR022669; IPR022671; IPR014726; IPR008991;
D1DG52	D1DG52_NEIGO	unreviewed	Chaperone protein DnaK (HSP70) (Heat shock 70 kDa protein) (Heat shock protein 70)	dnaK NGFG_01490	Neisseria gonorrhoeae MS11	642		ATP binding; protein folding; response to stress	IPR012725; IPR018181; IPR013126;
D1DKL5	D1DKL5_NEIGO	unreviewed	50S ribosomal protein L23	rplW NGFG_01754	Neisseria gonorrhoeae MS11	104		nucleotide binding; rRNA binding; ribosome; structural constituent of ribosome; translation	IPR012677; IPR012678; IPR013025;
D1DHY2	D1DHY2_NEIGO	unreviewed	Uncharacterized protein	NGFG_00509	Neisseria gonorrhoeae MS11	140
D1DIE5	D1DIE5_NEIGO	unreviewed	MafB family adhesin protein	NGFG_00672	Neisseria gonorrhoeae MS11	509			IPR008106;
D1DJG8	D1DJG8_NEIGO	unreviewed	Protein RecA (Recombinase A)	recA NGFG_01045	Neisseria gonorrhoeae MS11	348	Cytoplasm.	ATP binding; DNA recombination; DNA repair; DNA-dependent ATPase activity; SOS response; cytoplasm; damaged DNA binding; single-stranded DNA binding	IPR003593; IPR013765; IPR020584; IPR027417; IPR020588; IPR023400; IPR020587;
D1DKV3	D1DKV3_NEIGO	unreviewed	Glutamine--fructose-6-phosphate aminotransferase [isomerizing] (EC 2.6.1.16) (D-fructose-6-phosphate amidotransferase) (GFAT) (Glucosamine-6-phosphate synthase) (Hexosephosphate aminotransferase) (L-glutamine--D-fructose-6-phosphate amidotransferase)	glmS NGFG_01839	Neisseria gonorrhoeae MS11	612	Cytoplasm.	carbohydrate binding; carbohydrate biosynthetic process; cytoplasm; glutamine metabolic process; glutamine-fructose-6-phosphate transaminase (isomerizing) activity	IPR017932; IPR000583; IPR005855; IPR001347;
D1DL94	D1DL94_NEIGO	unreviewed	Twitching motility protein	NGFG_01980	Neisseria gonorrhoeae MS11	347		ATP binding; nucleoside-triphosphatase activity; transport	IPR003593; IPR027417; IPR006321; IPR001482;
D1DH12	D1DH12_NEIGO	unreviewed	Chromosome partitioning ATPase	NGFG_00189	Neisseria gonorrhoeae MS11	359			IPR025669; IPR019591; IPR027417;
D1DKX4	D1DKX4_NEIGO	unreviewed	50S ribosomal protein L13	rplM NGFG_01860	Neisseria gonorrhoeae MS11	143		ribosome; structural constituent of ribosome; translation	IPR005822; IPR005823; IPR023564;
D1DL19	D1DL19_NEIGO	unreviewed	Uncharacterized protein	NGFG_01905	Neisseria gonorrhoeae MS11	185
D1DHX1	D1DHX1_NEIGO	unreviewed	Twitching motility protein	NGFG_00498	Neisseria gonorrhoeae MS11	376		ATP binding; transport	IPR027417; IPR006321; IPR001482;
D1DGS2	D1DGS2_NEIGO	unreviewed	ATP synthase subunit C	NGFG_00099	Neisseria gonorrhoeae MS11	78		ATP hydrolysis coupled proton transport; ATP synthesis coupled proton transport; hydrogen ion transmembrane transporter activity; integral component of membrane; plasma membrane; proton-transporting ATP synthase complex, coupling factor F(o)	IPR000454; IPR005953; IPR020537; IPR002379;
D1DGS1	D1DGS1_NEIGO	unreviewed	ATP synthase subunit a (ATP synthase F0 sector subunit a) (F-ATPase subunit 6)	atpB NGFG_00098	Neisseria gonorrhoeae MS11	288	Cell membrane; Multi-pass membrane protein. Membrane; Multi-pass membrane protein.	integral component of membrane; plasma membrane; plasma membrane ATP synthesis coupled proton transport; proton-transporting ATP synthase activity, rotational mechanism; proton-transporting ATP synthase complex, coupling factor F(o)	IPR000568; IPR023011;
D1DL75	D1DL75_NEIGO	unreviewed	Uncharacterized protein	NGFG_01961	Neisseria gonorrhoeae MS11	131
D1DIQ5	D1DIQ5_NEIGO	unreviewed	Heme-utilization protein Hup	NGFG_00782	Neisseria gonorrhoeae MS11	905	Cell outer membrane.	cell outer membrane; integral component of membrane; receptor activity; transporter activity	IPR012910; IPR000531; IPR010917;
D1DHW3	D1DHW3_NEIGO	unreviewed	Cysteine synthase (EC 2.5.1.47)	NGFG_00490	Neisseria gonorrhoeae MS11	310		cysteine biosynthetic process from serine; cysteine synthase activity	IPR001216; IPR005856; IPR005859; IPR001926;
T2A2B7	T2A2B7_NEIGO	unreviewed	Uncharacterized protein	NGFG_02339	Neisseria gonorrhoeae MS11	114
T2A4I6	T2A4I6_NEIGO	unreviewed	Pilin pilS6c1	NGFG_02481	Neisseria gonorrhoeae MS11	125		cell adhesion; pilus	IPR001082;
D1DFZ1	D1DFZ1_NEIGO	unreviewed	N-acetylmuramoyl-L-alanine amidase AmiC	NGFG_01429	Neisseria gonorrhoeae MS11	416		N-acetylmuramoyl-L-alanine amidase activity; peptidoglycan catabolic process	IPR021731; IPR002508;
D1DHD4	D1DHD4_NEIGO	unreviewed	30S ribosomal protein S16	rpsP NGFG_00311	Neisseria gonorrhoeae MS11	81		ribosome; structural constituent of ribosome; translation	IPR000307; IPR023803;
D1DF93	D1DF93_NEIGO	unreviewed	Enolase (EC 4.2.1.11) (2-phospho-D-glycerate hydro-lyase) (2-phosphoglycerate dehydratase)	eno NGFG_01181	Neisseria gonorrhoeae MS11	428	Cytoplasm. Secreted. Cell surface.	cell surface; extracellular region; glycolytic process; magnesium ion binding; phosphopyruvate hydratase activity; phosphopyruvate hydratase complex	IPR000941; IPR020810; IPR020809; IPR020811;
T2A343	T2A343_NEIGO	unreviewed	Opacity protein	NGFG_02406	Neisseria gonorrhoeae MS11	233		cell outer membrane; integral component of membrane; porin activity	IPR017690; IPR011250; IPR003394;
D1DFP3	D1DFP3_NEIGO	unreviewed	Lipopolysaccharide transport periplasmic protein LptA	NGFG_01331	Neisseria gonorrhoeae MS11	176		lipopolysaccharide binding; lipopolysaccharide transport; periplasmic space	IPR014340; IPR005653;
D1DH57	D1DH57_NEIGO	unreviewed	Type IV pilus assembly protein PilO	NGFG_00234	Neisseria gonorrhoeae MS11	215			IPR007445; IPR014717;
D1DHU1	D1DHU1_NEIGO	unreviewed	Ubiquinone/menaquinone biosynthesis C-methyltransferase UbiE (EC 2.1.1.163) (EC 2.1.1.201) (2-methoxy-6-polyprenyl-1,4-benzoquinol methylase) (Demethylmenaquinone methyltransferase)	ubiE NGFG_00468	Neisseria gonorrhoeae MS11	245		menaquinone biosynthetic process; methyltransferase activity; ubiquinone biosynthetic process	IPR004033; IPR023576;
D1DG61	D1DG61_NEIGO	unreviewed	Thiamine biosynthesis lipoprotein	NGFG_01499	Neisseria gonorrhoeae MS11	351		periplasmic space; thiamine biosynthetic process	IPR003374; IPR024932;
D1DL01	D1DL01_NEIGO	unreviewed	Integral membrane protein	NGFG_01887	Neisseria gonorrhoeae MS11	193			IPR010432;
D1DG55	D1DG55_NEIGO	unreviewed	Putative iron-sulfur cluster insertion protein ErpA	erpA NGFG_01493	Neisseria gonorrhoeae MS11	153		iron ion binding; iron-sulfur cluster assembly; iron-sulfur cluster binding; structural molecule activity	IPR000361; IPR016092; IPR017870; IPR023063;
D1DHG4	D1DHG4_NEIGO	unreviewed	Putrescine-binding periplasmic protein	NGFG_00341	Neisseria gonorrhoeae MS11	379	Periplasm.	periplasmic space; polyamine binding; polyamine transport	IPR001188;
D1DHH6	D1DHH6_NEIGO	unreviewed	Major ferric iron-binding protein	NGFG_00353	Neisseria gonorrhoeae MS11	331		transporter activity	IPR026045; IPR006059; IPR006061;
D1DHN4	D1DHN4_NEIGO	unreviewed	Uncharacterized protein	NGFG_00411	Neisseria gonorrhoeae MS11	189
D1DF85	D1DF85_NEIGO	unreviewed	Lytic murein transglycosylase B	NGFG_01173	Neisseria gonorrhoeae MS11	363			IPR023346; IPR011757;
D1DK42	D1DK42_NEIGO	unreviewed	Type IV pilus assembly protein PilC	NGFG_02119	Neisseria gonorrhoeae MS11	410	Membrane; Multi-pass membrane protein.	integral component of membrane; protein secretion	IPR003004; IPR018076; IPR001992;
D1DFW2	D1DFW2_NEIGO	unreviewed	Cell division protein ftsA	NGFG_01400	Neisseria gonorrhoeae MS11	414		cell cycle; cell division; regulation of cell shape	IPR020823; IPR003494;
D1DKD9	D1DKD9_NEIGO	unreviewed	Catalase (EC 1.11.1.6)	NGFG_01678	Neisseria gonorrhoeae MS11	504		catalase activity; heme binding; hydrogen peroxide catabolic process; metal ion binding	IPR018028; IPR020835; IPR024708; IPR024711; IPR011614; IPR002226; IPR010582;
T2A2N7	T2A2N7_NEIGO	unreviewed	MafB family adhesin protein	NGFG_02478	Neisseria gonorrhoeae MS11	521			IPR008106;
D1DGT9	D1DGT9_NEIGO	unreviewed	3-oxoacyl-[acyl-carrier-protein] reductase	NGFG_00116	Neisseria gonorrhoeae MS11	248		3-oxoacyl-[acyl-carrier-protein] reductase (NADPH) activity; NAD binding; fatty acid biosynthetic process	IPR011284; IPR002198; IPR002347; IPR016040; IPR020904;
D1DI79	D1DI79_NEIGO	unreviewed	Prepilin-type N-terminal cleavage/methylation domain-containing protein	NGFG_00606	Neisseria gonorrhoeae MS11	220		protein secretion by the type II secretion system; protein transporter activity; type II protein secretion system complex	IPR012902; IPR022346;
D1DIZ2	D1DIZ2_NEIGO	unreviewed	Uncharacterized protein	NGFG_00869	Neisseria gonorrhoeae MS11	80
D1DKU1	D1DKU1_NEIGO	unreviewed	ABC transporter periplasmic binding protein, thiB subfamily	NGFG_01827	Neisseria gonorrhoeae MS11	333		outer membrane-bounded periplasmic space; thiamine binding; thiamine transport; transporter activity	IPR005948;
T2A4E5	T2A4E5_NEIGO	unreviewed	Opacity protein	NGFG_02435	Neisseria gonorrhoeae MS11	226		cell outer membrane; integral component of membrane; porin activity	IPR017690; IPR011250; IPR003394;
D1DFE8	D1DFE8_NEIGO	unreviewed	Uncharacterized protein	NGFG_01236	Neisseria gonorrhoeae MS11	516			IPR010352;
D1DGF8	D1DGF8_NEIGO	unreviewed	Uncharacterized protein	NGFG_01596	Neisseria gonorrhoeae MS11	172			IPR005586;
D1DKT5	D1DKT5_NEIGO	unreviewed	Pilin pilE	NGFG_01821	Neisseria gonorrhoeae MS11	166		cell adhesion; pilus	IPR012902; IPR001082;
D1DKV0	D1DKV0_NEIGO	unreviewed	Membrane-bound lytic murein transglycosylase A	NGFG_01836	Neisseria gonorrhoeae MS11	441		hydrolase activity, hydrolyzing O-glycosyl compounds; outer membrane; peptidoglycan turnover	IPR010611; IPR014733; IPR005300; IPR026044; IPR009009;
D1DH04	D1DH04_NEIGO	unreviewed	Carbamoyl-phosphate synthase large chain (EC 6.3.5.5) (Carbamoyl-phosphate synthetase ammonia chain)	carB NGFG_00181	Neisseria gonorrhoeae MS11	1071		'de novo' UMP biosynthetic process; ATP binding; arginine biosynthetic process; carbamoyl-phosphate synthase (glutamine-hydrolyzing) activity; magnesium ion binding; manganese ion binding	IPR011761; IPR013815; IPR013816; IPR006275; IPR005481; IPR005480; IPR005479; IPR005483; IPR011607; IPR016185;
D1DKK0	D1DKK0_NEIGO	unreviewed	30S ribosomal protein S5	rpsE NGFG_01739	Neisseria gonorrhoeae MS11	172		rRNA binding; small ribosomal subunit; structural constituent of ribosome; translation	IPR014720; IPR000851; IPR005712; IPR005324; IPR020568; IPR014721; IPR013810; IPR018192;
T2A269	T2A269_NEIGO	unreviewed	Polyribonucleotide nucleotidyltransferase (EC 2.7.7.8) (Polynucleotide phosphorylase)	pnp NGFG_02282	Neisseria gonorrhoeae MS11	706	Cytoplasm.	3'-5'-exoribonuclease activity; RNA binding; RNA processing; cytoplasm; mRNA catabolic process; magnesium ion binding; polyribonucleotide nucleotidyltransferase activity	IPR001247; IPR015847; IPR004087; IPR004088; IPR012340; IPR012162; IPR027408; IPR015848; IPR003029; IPR020568; IPR022967;
T2A2P2	T2A2P2_NEIGO	unreviewed	Opacity protein	NGFG_02483	Neisseria gonorrhoeae MS11	179		cell outer membrane; integral component of membrane; porin activity	IPR017690; IPR011250; IPR003394;
D1DIQ9	D1DIQ9_NEIGO	unreviewed	Lipoprotein	NGFG_00786	Neisseria gonorrhoeae MS11	375
D1DK29	D1DK29_NEIGO	unreviewed	Uncharacterized protein	NGFG_02106	Neisseria gonorrhoeae MS11	288		peptidyl-prolyl cis-trans isomerase activity; protein folding	IPR000297; IPR027304;
D1DI65	D1DI65_NEIGO	unreviewed	Outer-membrane lipoprotein lolB	NGFG_00592	Neisseria gonorrhoeae MS11	193		cell outer membrane; protein transport	IPR004565;
D1DKT0	D1DKT0_NEIGO	unreviewed	Pilin pilS1c12	NGFG_02253	Neisseria gonorrhoeae MS11	260		cell adhesion; pilus	IPR001082;
D1DIU2	D1DIU2_NEIGO	unreviewed	Succinyl-CoA ligase [ADP-forming] subunit beta (EC 6.2.1.5) (Succinyl-CoA synthetase subunit beta)	sucC NGFG_00819	Neisseria gonorrhoeae MS11	388		ATP binding; magnesium ion binding; manganese ion binding; succinate-CoA ligase (ADP-forming) activity; tricarboxylic acid cycle	IPR011761; IPR013650; IPR013815; IPR013816; IPR005811; IPR017866; IPR005809; IPR016102;
D1DKK4	D1DKK4_NEIGO	unreviewed	30S ribosomal protein S14	rpsN NGFG_01743	Neisseria gonorrhoeae MS11	101		rRNA binding; ribosome; structural constituent of ribosome; translation	IPR001209; IPR023036;
D1DGS3	D1DGS3_NEIGO	unreviewed	ATP synthase subunit b (ATP synthase F(0) sector subunit b) (ATPase subunit I) (F-type ATPase subunit b)	atpF NGFG_00100	Neisseria gonorrhoeae MS11	156	Cell membrane; Single-pass membrane protein.	integral component of membrane; plasma membrane; plasma membrane ATP synthesis coupled proton transport; proton-transporting ATP synthase activity, rotational mechanism; proton-transporting ATP synthase complex, coupling factor F(o)	IPR002146; IPR005864;
D1DGS7	D1DGS7_NEIGO	unreviewed	ATP synthase subunit beta (EC 3.6.3.14) (ATP synthase F1 sector subunit beta) (F-ATPase subunit beta)	atpD NGFG_00104	Neisseria gonorrhoeae MS11	465	Cell membrane; Peripheral membrane protein.	ATP binding; ATP hydrolysis coupled proton transport; plasma membrane; plasma membrane ATP synthesis coupled proton transport; proton-transporting ATP synthase activity, rotational mechanism; proton-transporting ATP synthase complex, catalytic core F(1)	IPR003593; IPR020003; IPR005722; IPR000793; IPR000194; IPR004100; IPR024034; IPR027417;
D1DG26	D1DG26_NEIGO	unreviewed	Xaa-Pro aminopeptidase	NGFG_01464	Neisseria gonorrhoeae MS11	658		aminopeptidase activity	IPR000587; IPR000994;
D1DI80	D1DI80_NEIGO	unreviewed	Type IV pilus modification protein PilV	NGFG_00607	Neisseria gonorrhoeae MS11	202			IPR013362;
D1DG04	D1DG04_NEIGO	unreviewed	Agmatinase (EC 3.5.3.11) (Agmatine ureohydrolase)	speB NGFG_01442	Neisseria gonorrhoeae MS11	307		agmatinase activity; manganese ion binding; putrescine biosynthetic process from arginine; spermidine biosynthetic process	IPR023694; IPR005925; IPR006035; IPR023696; IPR020855;
D1DGP8	D1DGP8_NEIGO	unreviewed	Lipoprotein	NGFG_00075	Neisseria gonorrhoeae MS11	275		membrane	IPR007428;
D1DIT8	D1DIT8_NEIGO	unreviewed	Oxoglutarate dehydrogenase (Succinyl-transferring), E1 component	NGFG_00815	Neisseria gonorrhoeae MS11	942		oxoglutarate dehydrogenase (succinyl-transferring) activity; thiamine pyrophosphate binding; tricarboxylic acid cycle	IPR011603; IPR001017; IPR005475;
D1DL16	D1DL16_NEIGO	unreviewed	Uncharacterized protein	NGFG_01902	Neisseria gonorrhoeae MS11	216
D1DHF0	D1DHF0_NEIGO	unreviewed	Protein translocase subunit SecD	secD NGFG_00327	Neisseria gonorrhoeae MS11	617	Cell membrane; Multi-pass membrane protein.	P-P-bond-hydrolysis-driven protein transmembrane transporter activity; integral component of membrane; intracellular; intracellular protein transmembrane transport; plasma membrane; protein targeting; protein transport by the Sec complex	IPR005791; IPR027398; IPR022813; IPR022645; IPR022646;
D1DKN1	D1DKN1_NEIGO	unreviewed	50S ribosomal protein L1	rplA NGFG_01770	Neisseria gonorrhoeae MS11	231		large ribosomal subunit; rRNA binding; regulation of translation; structural constituent of ribosome; tRNA binding; translation	IPR005878; IPR002143; IPR023674; IPR028364; IPR016094; IPR016095; IPR023673;
D1DKQ3	D1DKQ3_NEIGO	unreviewed	Aspartate carbamoyltransferase (EC 2.1.3.2) (Aspartate transcarbamylase)	pyrB NGFG_01792	Neisseria gonorrhoeae MS11	306		'de novo' UMP biosynthetic process; 'de novo' pyrimidine nucleobase biosynthetic process; amino acid binding; aspartate carbamoyltransferase activity; cellular amino acid metabolic process	IPR006132; IPR006130; IPR002082; IPR006131;
D1DIH6	D1DIH6_NEIGO	unreviewed	Transglycosylase	NGFG_00703	Neisseria gonorrhoeae MS11	207			IPR023346; IPR008258;
D1DKX3	D1DKX3_NEIGO	unreviewed	30S ribosomal protein S9	rpsI NGFG_01859	Neisseria gonorrhoeae MS11	130		ribosome; structural constituent of ribosome; translation	IPR020568; IPR014721; IPR000754; IPR023035; IPR020574;
D1DGM2	D1DGM2_NEIGO	unreviewed	Lipoprotein	NGFG_00049	Neisseria gonorrhoeae MS11	56
D1DKP9	D1DKP9_NEIGO	unreviewed	LysM protein	NGFG_01788	Neisseria gonorrhoeae MS11	407		cell wall macromolecule catabolic process	IPR018392;
D1DKL8	D1DKL8_NEIGO	unreviewed	Elongation factor G (EF-G)	fusA NGFG_01757	Neisseria gonorrhoeae MS11	701	Cytoplasm.	GTP binding; GTPase activity; cytoplasm; translation elongation factor activity	IPR000795; IPR009022; IPR000640; IPR027417; IPR020568; IPR014721; IPR005225; IPR009000; IPR004540; IPR005517; IPR004161;
T2A3R4	T2A3R4_NEIGO	unreviewed	Opacity protein	NGFG_02351	Neisseria gonorrhoeae MS11	228		cell outer membrane; integral component of membrane; porin activity	IPR017690; IPR011250; IPR003394;
D1DI89	D1DI89_NEIGO	unreviewed	Succinyldiaminopimelate transaminase	NGFG_00616	Neisseria gonorrhoeae MS11	395		lysine biosynthetic process via diaminopimelate; pyridoxal phosphate binding; succinyldiaminopimelate transaminase activity	IPR004839; IPR019878; IPR015424; IPR015421; IPR015422;
D1DJV5	D1DJV5_NEIGO	unreviewed	Peptidyl-prolyl cis-trans isomerase (EC 5.2.1.8)	NGFG_02032	Neisseria gonorrhoeae MS11	272		peptidyl-prolyl cis-trans isomerase activity; protein folding	IPR023566; IPR001179; IPR000774;
D1DKN2	D1DKN2_NEIGO	unreviewed	50S ribosomal protein L11	rplK NGFG_01771	Neisseria gonorrhoeae MS11	144		LSU rRNA binding; ribosome; structural constituent of ribosome; translation	IPR000911; IPR006519; IPR020783; IPR020785; IPR020784;
D1DKH7	D1DKH7_NEIGO	unreviewed	Outer membrane protein OmpH	NGFG_01716	Neisseria gonorrhoeae MS11	166			IPR005632; IPR024930;
D1DKT3	D1DKT3_NEIGO	unreviewed	Pilin pilEuss2	NGFG_01819	Neisseria gonorrhoeae MS11	122		cell adhesion; pilus	IPR001082;
D1DF35	D1DF35_NEIGO	unreviewed	3-isopropylmalate dehydrogenase (EC 1.1.1.85) (3-IPM-DH) (Beta-IPM dehydrogenase)	leuB NGFG_01123	Neisseria gonorrhoeae MS11	356	Cytoplasm.	3-isopropylmalate dehydrogenase activity; NAD binding; cytoplasm; leucine biosynthetic process; magnesium ion binding	IPR019818; IPR001804; IPR024084; IPR004429;
D1DH59	D1DH59_NEIGO	unreviewed	Type IV pilus assembly protein PilM	NGFG_00236	Neisseria gonorrhoeae MS11	371			IPR005883;
D1DG43	D1DG43_NEIGO	unreviewed	Macrolide export ATP-binding/permease MacB	NGFG_01481	Neisseria gonorrhoeae MS11	644	Cell inner membrane; Multi-pass membrane protein.	ATP binding; ATPase activity; hydrolase activity, acting on acid anhydrides, catalyzing transmembrane movement of substances; integral component of membrane; plasma membrane; response to antibiotic	IPR003593; IPR003439; IPR017871; IPR017911; IPR025857; IPR027417; IPR003838;
D1DJP0	D1DJP0_NEIGO	unreviewed	Adhesin mafA 2/3	NGFG_02194	Neisseria gonorrhoeae MS11	313
D1DG42	D1DG42_NEIGO	unreviewed	Efflux transporter, RND family, MFP subunit	NGFG_01480	Neisseria gonorrhoeae MS11	392		membrane; transmembrane transport	IPR006143;
D1DIU0	D1DIU0_NEIGO	unreviewed	Dihydrolipoyl dehydrogenase (EC 1.8.1.4)	NGFG_00817	Neisseria gonorrhoeae MS11	477		cell redox homeostasis; dihydrolipoyl dehydrogenase activity; flavin adenine dinucleotide binding	IPR016156; IPR013027; IPR006258; IPR004099; IPR023753; IPR012999; IPR001327;
D1DKK6	D1DKK6_NEIGO	unreviewed	50S ribosomal protein L24	rplX NGFG_01745	Neisseria gonorrhoeae MS11	107		rRNA binding; ribosome; structural constituent of ribosome; translation	IPR005824; IPR014722; IPR003256; IPR005825; IPR008991;
D1DKL6	D1DKL6_NEIGO	unreviewed	50S ribosomal protein L4	rplD NGFG_01755	Neisseria gonorrhoeae MS11	206		rRNA binding; ribosome; structural constituent of ribosome; translation	IPR002136; IPR013005; IPR023574;
D1DJT5	D1DJT5_NEIGO	unreviewed	UvrABC system protein A (UvrA protein) (Excinuclease ABC subunit A)	uvrA NGFG_02012	Neisseria gonorrhoeae MS11	949	Cytoplasm.	ATP binding; ATPase activity; DNA binding; SOS response; cytoplasm; excinuclease ABC activity; excinuclease repair complex; nucleotide-excision repair; zinc ion binding	IPR003439; IPR017871; IPR013815; IPR027417; IPR004602;
D1DGN7	D1DGN7_NEIGO	unreviewed	Uncharacterized protein	NGFG_00064	Neisseria gonorrhoeae MS11	538			IPR007655;
D1DFE4	D1DFE4_NEIGO	unreviewed	Pyruvate dehydrogenase E1 component (EC 1.2.4.1)	NGFG_01232	Neisseria gonorrhoeae MS11	887		pyruvate dehydrogenase (acetyl-transferring) activity	IPR004660; IPR009014; IPR005474;
D1DH55	D1DH55_NEIGO	unreviewed	Type IV pilus biogenesis and competence protein pilQ	NGFG_00232	Neisseria gonorrhoeae MS11	713	Cell outer membrane.	cell outer membrane; pilus assembly; protein secretion; protein transporter activity	IPR021731; IPR001775; IPR005644; IPR013355; IPR011662; IPR004846; IPR004845;
D1DKL7	D1DKL7_NEIGO	unreviewed	50S ribosomal protein L3	rplC NGFG_01756	Neisseria gonorrhoeae MS11	214		rRNA binding; ribosome; structural constituent of ribosome; translation	IPR000597; IPR019927; IPR019926; IPR009000;
D1DL61	D1DL61_NEIGO	unreviewed	Lipoprotein	NGFG_01947	Neisseria gonorrhoeae MS11	140
D1DFW3	D1DFW3_NEIGO	unreviewed	Cell division protein FtsZ	ftsZ NGFG_01401	Neisseria gonorrhoeae MS11	392	Cytoplasm.	GTP binding; GTPase activity; barrier septum assembly; cell division site; cytokinesis by binary fission; cytoplasm; protein complex; protein polymerization	IPR000158; IPR020805; IPR024757; IPR008280; IPR018316; IPR003008;
D1DIW3	D1DIW3_NEIGO	unreviewed	Uncharacterized protein	NGFG_00840	Neisseria gonorrhoeae MS11	139
D1DIE8	D1DIE8_NEIGO	unreviewed	Lipoprotein	NGFG_00675	Neisseria gonorrhoeae MS11	126			IPR018660;
D1DIC9	D1DIC9_NEIGO	unreviewed	CMP-N-acetylneuraminate-beta-galactosamide-alpha-2,3-sialyltransferase	NGFG_00656	Neisseria gonorrhoeae MS11	378		transferase activity, transferring glycosyl groups	IPR012477;
D1DFB4	D1DFB4_NEIGO	unreviewed	Type IV pilus biogenesis/stability protein PilW	NGFG_01202	Neisseria gonorrhoeae MS11	253			IPR013360; IPR013026; IPR011990; IPR001440; IPR019734;
D1DK35	D1DK35_NEIGO	unreviewed	Uncharacterized protein	NGFG_02112	Neisseria gonorrhoeae MS11	402			IPR011990; IPR019734;
D1DKI6	D1DKI6_NEIGO	unreviewed	Major outer membrane protein P.IB	NGFG_01725	Neisseria gonorrhoeae MS11	350	Cell outer membrane; Multi-pass membrane protein.	cell outer membrane; ion transport; plasma membrane; pore complex; porin activity	IPR023614; IPR001702; IPR013793; IPR002299;
D1DL85	D1DL85_NEIGO	unreviewed	UDP-N-acetylglucosamine 1-carboxyvinyltransferase (EC 2.5.1.7) (Enoylpyruvate transferase) (UDP-N-acetylglucosamine enolpyruvyl transferase)	murA NGFG_01971	Neisseria gonorrhoeae MS11	417	Cytoplasm.	UDP-N-acetylgalactosamine biosynthetic process; UDP-N-acetylglucosamine 1-carboxyvinyltransferase activity; cell cycle; cell division; cytoplasm; peptidoglycan biosynthetic process; regulation of cell shape	IPR001986; IPR013792; IPR005750;
D1DIN0	D1DIN0_NEIGO	unreviewed	Thiol:disulfide interchange protein DsbD (EC 1.8.1.8) (Protein-disulfide reductase)	dsbD NGFG_00757	Neisseria gonorrhoeae MS11	601	Cell inner membrane; Multi-pass membrane protein.	cell redox homeostasis; cytochrome complex assembly; electron carrier activity; integral component of membrane; plasma membrane; protein-disulfide reductase activity	IPR003834; IPR028250; IPR022910; IPR012336;
D1DJY1	D1DJY1_NEIGO	unreviewed	Uncharacterized protein	NGFG_02058	Neisseria gonorrhoeae MS11	165
D1DG20	D1DG20_NEIGO	unreviewed	NAD(P) transhydrogenase subunit alpha (EC 1.6.1.2)	NGFG_01458	Neisseria gonorrhoeae MS11	512		NAD(P)+ transhydrogenase (AB-specific) activity; nucleotide binding; proton transport	IPR008142; IPR008143; IPR007886; IPR007698; IPR026255; IPR024605;
D1DHQ0	D1DHQ0_NEIGO	unreviewed	Uncharacterized protein	NGFG_00427	Neisseria gonorrhoeae MS11	294			IPR005229; IPR013551; IPR013527;
D1DFC4	D1DFC4_NEIGO	unreviewed	50S ribosomal protein L9	rplI NGFG_01212	Neisseria gonorrhoeae MS11	150		rRNA binding; ribosome; structural constituent of ribosome; translation	IPR000244; IPR009027; IPR020594; IPR020069; IPR020070;
D1DKJ9	D1DKJ9_NEIGO	unreviewed	50S ribosomal protein L30	rpmD NGFG_01738	Neisseria gonorrhoeae MS11	61		large ribosomal subunit; structural constituent of ribosome; translation	IPR005996; IPR016082;
D1DIV2	D1DIV2_NEIGO	unreviewed	3-phosphoshikimate 1-carboxyvinyltransferase (EC 2.5.1.19) (5-enolpyruvylshikimate-3-phosphate synthase)	aroA NGFG_00829	Neisseria gonorrhoeae MS11	433	Cytoplasm.	3-phosphoshikimate 1-carboxyvinyltransferase activity; aromatic amino acid family biosynthetic process; chorismate biosynthetic process; cytoplasm	IPR001986; IPR006264; IPR023193; IPR013792;
D1DG47	D1DG47_NEIGO	unreviewed	Cadmium resistance transporter	NGFG_01485	Neisseria gonorrhoeae MS11	204			IPR004676; IPR018388;
D1DHF8	D1DHF8_NEIGO	unreviewed	Transcription termination factor Rho (EC 3.6.4.-) (ATP-dependent helicase Rho)	rho NGFG_00335	Neisseria gonorrhoeae MS11	419		ATP binding; DNA-templated transcription, termination; RNA binding; RNA-dependent ATPase activity; helicase activity; regulation of transcription, DNA-templated	IPR003593; IPR000194; IPR011129; IPR012340; IPR027417; IPR011112; IPR011113; IPR004665;
D1DL68	D1DL68_NEIGO	unreviewed	Electron transfer flavoprotein beta subunit ETFB	NGFG_01954	Neisseria gonorrhoeae MS11	249		electron carrier activity	IPR000049; IPR014730; IPR012255; IPR014729;
D1DKD4	D1DKD4_NEIGO	unreviewed	Acyl carrier protein (ACP)	acpP NGFG_01673	Neisseria gonorrhoeae MS11	78	Cytoplasm.	ACP phosphopantetheine attachment site binding involved in fatty acid biosynthetic process; cytoplasm	IPR003231; IPR009081; IPR006162;
D1DJE5	D1DJE5_NEIGO	unreviewed	Uncharacterized protein	NGFG_01022	Neisseria gonorrhoeae MS11	92
D1DJK4	D1DJK4_NEIGO	unreviewed	Muramoyltetrapeptide carboxypeptidase	NGFG_02152	Neisseria gonorrhoeae MS11	393		carboxypeptidase activity	IPR027461; IPR003507; IPR027478; IPR006311; IPR019546;
D1DJE7	D1DJE7_NEIGO	unreviewed	Peptidyl-prolyl cis-trans isomerase D	NGFG_01024	Neisseria gonorrhoeae MS11	512		isomerase activity	IPR000297; IPR027304;
D1DK86	D1DK86_NEIGO	unreviewed	Peptidyl-prolyl cis-trans isomerase SurA	NGFG_01625	Neisseria gonorrhoeae MS11	332		peptidyl-prolyl cis-trans isomerase activity; protein folding	IPR000297; IPR023058; IPR027304;
D1DGB0	D1DGB0_NEIGO	unreviewed	Cytochrome c oxidase, cbb3-type, subunit III	NGFG_01548	Neisseria gonorrhoeae MS11	439		electron carrier activity; heme binding; iron ion binding	IPR009056; IPR004678; IPR002323; IPR011031;
D1DH56	D1DH56_NEIGO	unreviewed	Type IV pilus assembly protein PilP	NGFG_00233	Neisseria gonorrhoeae MS11	181			IPR007446;
D1DJW5	D1DJW5_NEIGO	unreviewed	Acetolactate synthase (EC 2.2.1.6)	NGFG_02042	Neisseria gonorrhoeae MS11	575		acetolactate synthase activity; flavin adenine dinucleotide binding; isoleucine biosynthetic process; magnesium ion binding; thiamine pyrophosphate binding; valine biosynthetic process	IPR012846; IPR012000; IPR012001; IPR000399; IPR011766;
D1DL15	D1DL15_NEIGO	unreviewed	Phospholipid-binding protein	NGFG_01901	Neisseria gonorrhoeae MS11	202			IPR007055;
D1DFS4	D1DFS4_NEIGO	unreviewed	ABC transporter ATP-binding protein	NGFG_01362	Neisseria gonorrhoeae MS11	558		ATP binding; ATPase activity	IPR003593; IPR022374; IPR003439; IPR017871; IPR027417;
D1DL48	D1DL48_NEIGO	unreviewed	Outer membrane protein	NGFG_01934	Neisseria gonorrhoeae MS11	635		outer membrane	IPR000184; IPR010827;
D1DJL9	D1DJL9_NEIGO	unreviewed	Probable transcriptional regulatory protein NGFG_02167	NGFG_02167	Neisseria gonorrhoeae MS11	242	Cytoplasm.	DNA binding; cytoplasm; regulation of transcription, DNA-templated; transcription, DNA-templated	IPR017856; IPR002876; IPR026563; IPR026564;
D1DKL0	D1DKL0_NEIGO	unreviewed	50S ribosomal protein L16	rplP NGFG_01749	Neisseria gonorrhoeae MS11	138		rRNA binding; ribosome; structural constituent of ribosome; tRNA binding; translation	IPR016180; IPR000114; IPR020798;
D1DJD3	D1DJD3_NEIGO	unreviewed	Homoserine dehydrogenase (EC 1.1.1.3)	NGFG_01010	Neisseria gonorrhoeae MS11	435		NADP binding; amino acid binding; homoserine dehydrogenase activity; isoleucine biosynthetic process; methionine biosynthetic process; threonine biosynthetic process	IPR002912; IPR005106; IPR016204; IPR001342; IPR019811; IPR016040;
D1DJX9	D1DJX9_NEIGO	unreviewed	4-carboxymuconolactone decarboxylase	NGFG_02056	Neisseria gonorrhoeae MS11	111		peroxidase activity; peroxiredoxin activity	IPR004675; IPR003779;
D1DL67	D1DL67_NEIGO	unreviewed	Electron transfer flavoprotein alpha subunit EtfA	NGFG_01953	Neisseria gonorrhoeae MS11	311		electron carrier activity; flavin adenine dinucleotide binding	IPR001308; IPR014730; IPR014731; IPR014729;
D1DGR2	D1DGR2_NEIGO	unreviewed	Soluble lytic murein transglycosylase	NGFG_00089	Neisseria gonorrhoeae MS11	616		hydrolase activity, hydrolyzing O-glycosyl compounds; periplasmic space	IPR023346; IPR016026; IPR012289; IPR008939; IPR008258;
D1DHF9	D1DHF9_NEIGO	unreviewed	Phosphoenolpyruvate synthase (PEP synthase) (EC 2.7.9.2) (Pyruvate, water dikinase)	NGFG_00336	Neisseria gonorrhoeae MS11	794		ATP binding; gluconeogenesis; metal ion binding; pyruvate metabolic process; pyruvate, water dikinase activity	IPR013815; IPR013816; IPR008279; IPR006319; IPR018274; IPR000121; IPR023151; IPR002192; IPR015813;
D1DI81	D1DI81_NEIGO	unreviewed	Type IV pilus assembly protein PilW	NGFG_00608	Neisseria gonorrhoeae MS11	313
D1DJ57	D1DJ57_NEIGO	unreviewed	Bacterioferritin	NGFG_00934	Neisseria gonorrhoeae MS11	154		cellular iron ion homeostasis; ferric iron binding; iron ion transport	IPR002024; IPR009040; IPR009078; IPR012347; IPR008331;
D1DJG6	D1DJG6_NEIGO	unreviewed	DNA polymerase III, subunit gamma and tau	NGFG_01043	Neisseria gonorrhoeae MS11	707		ATP binding; DNA binding; DNA polymerase III complex; DNA-directed DNA polymerase activity; nucleoside-triphosphatase activity	IPR003593; IPR008921; IPR022754; IPR012763; IPR027417;
D1DJK6	D1DJK6_NEIGO	unreviewed	Copper-containing nitrite reductase	NGFG_02154	Neisseria gonorrhoeae MS11	392		copper ion binding; nitrite reductase (NO-forming) activity; nitrogen compound metabolic process	IPR011707; IPR008972; IPR001287;
D1DKF2	D1DKF2_NEIGO	unreviewed	Outer membrane protein assembly factor BamE	bamE NGFG_01691	Neisseria gonorrhoeae MS11	125	Cell outer membrane; Lipid-anchor.	Gram-negative-bacterium-type cell outer membrane assembly; cell outer membrane; plasma membrane; protein insertion into membrane	IPR026592; IPR007450;
D1DFU9	D1DFU9_NEIGO	unreviewed	Penicillin-binding protein 2	NGFG_01387	Neisseria gonorrhoeae MS11	583		penicillin binding	IPR012338; IPR005311; IPR001460;
D1DII4	D1DII4_NEIGO	unreviewed	Ferredoxin	NGFG_00711	Neisseria gonorrhoeae MS11	498		integral component of membrane; iron-sulfur cluster binding	IPR001450; IPR017896; IPR017900; IPR014116; IPR013783;
D1DJI4	D1DJI4_NEIGO	unreviewed	Opacity protein	NGFG_02238	Neisseria gonorrhoeae MS11	237		cell outer membrane; integral component of membrane; porin activity	IPR017690; IPR011250; IPR003394;
D1DHN3	D1DHN3_NEIGO	unreviewed	Polar amino acid ABC transporter ATP-binding protein	NGFG_00410	Neisseria gonorrhoeae MS11	245		ATP binding; ATPase activity	IPR003593; IPR003439; IPR017871; IPR027417;
D1DKL1	D1DKL1_NEIGO	unreviewed	30S ribosomal protein S3	rpsC NGFG_01750	Neisseria gonorrhoeae MS11	230		mRNA binding; rRNA binding; small ribosomal subunit; structural constituent of ribosome; translation	IPR004087; IPR015946; IPR004044; IPR009019; IPR005704; IPR001351; IPR018280;
D1DKK7	D1DKK7_NEIGO	unreviewed	50S ribosomal protein L14	rplN NGFG_01746	Neisseria gonorrhoeae MS11	122		large ribosomal subunit; rRNA binding; structural constituent of ribosome; translation	IPR005745; IPR019972; IPR023571; IPR000218;
D1DFD4	D1DFD4_NEIGO	unreviewed	Carbonic anhydrase	NGFG_01222	Neisseria gonorrhoeae MS11	252		carbonate dehydratase activity; one-carbon metabolic process; zinc ion binding	IPR001148; IPR023561; IPR018338;
D1DJ21	D1DJ21_NEIGO	unreviewed	Chaperone protein HscA homolog	hscA NGFG_00898	Neisseria gonorrhoeae MS11	672		ATP binding; ATPase activity; iron-sulfur cluster assembly; protein folding	IPR018181; IPR013126; IPR010236;
D1DK46	D1DK46_NEIGO	unreviewed	Type IV pilus assembly protein pilF	NGFG_02123	Neisseria gonorrhoeae MS11	558		ATP binding; nucleoside-triphosphatase activity; pilus assembly; protein transporter activity	IPR003593; IPR013374; IPR007831; IPR027417; IPR001482;
D1DKX8	D1DKX8_NEIGO	unreviewed	Phosphoenolpyruvate carboxylase (PEPC) (PEPCase) (EC 4.1.1.31)	ppc NGFG_01864	Neisseria gonorrhoeae MS11	900		carbon fixation; magnesium ion binding; oxaloacetate metabolic process; phosphoenolpyruvate carboxylase activity; tricarboxylic acid cycle	IPR021135; IPR018129; IPR022805; IPR015813;
D1DFD7	D1DFD7_NEIGO	unreviewed	Metallopeptidase	NGFG_01225	Neisseria gonorrhoeae MS11	598			IPR011055; IPR016047;
D1DFU3	D1DFU3_NEIGO	unreviewed	Thiol:disulfide interchange protein	NGFG_01381	Neisseria gonorrhoeae MS11	214	Periplasm.	cell redox homeostasis; periplasmic space	IPR023205; IPR012336; IPR017937;
D1DHJ2	D1DHJ2_NEIGO	unreviewed	Opacity protein	NGFG_00369	Neisseria gonorrhoeae MS11	175		cell outer membrane; integral component of membrane; porin activity	IPR017690; IPR011250; IPR003394;
D1DJW2	D1DJW2_NEIGO	unreviewed	Ketol-acid reductoisomerase (EC 1.1.1.86) (Acetohydroxy-acid isomeroreductase) (Alpha-keto-beta-hydroxylacyl reductoisomerase)	ilvC NGFG_02039	Neisseria gonorrhoeae MS11	337		coenzyme binding; isoleucine biosynthetic process; isomerase activity; ketol-acid reductoisomerase activity; valine biosynthetic process	IPR008927; IPR013023; IPR000506; IPR013328; IPR013116;
T2A3Z8	T2A3Z8_NEIGO	unreviewed	Opacity protein	NGFG_02259	Neisseria gonorrhoeae MS11	227		cell outer membrane; integral component of membrane; porin activity	IPR017690; IPR011250; IPR003394;
D1DFZ8	D1DFZ8_NEIGO	unreviewed	30S ribosomal protein S20	rpsT NGFG_01436	Neisseria gonorrhoeae MS11	87		rRNA binding; ribosome; structural constituent of ribosome; translation	IPR002583;
D1DF73	D1DF73_NEIGO	unreviewed	L-lactate dehydrogenase	NGFG_01161	Neisseria gonorrhoeae MS11	390		FMN binding; oxidoreductase activity	IPR013785; IPR012133; IPR000262; IPR008259;
D1DIT5	D1DIT5_NEIGO	unreviewed	Succinate dehydrogenase and fumarate reductase iron-sulfur protein	NGFG_00812	Neisseria gonorrhoeae MS11	235		electron carrier activity; iron-sulfur cluster binding; oxidoreductase activity; tricarboxylic acid cycle	IPR001041; IPR017896; IPR017900; IPR012675; IPR009051; IPR004489; IPR025192;
D1DI40	D1DI40_NEIGO	unreviewed	Uncharacterized protein	NGFG_00567	Neisseria gonorrhoeae MS11	243
D1DKM0	D1DKM0_NEIGO	unreviewed	30S ribosomal protein S12	rpsL NGFG_01759	Neisseria gonorrhoeae MS11	123		rRNA binding; small ribosomal subunit; structural constituent of ribosome; tRNA binding; translation	IPR012340; IPR006032; IPR005679;
D1DIF6	D1DIF6_NEIGO	unreviewed	Lipoprotein NlpD	NGFG_00683	Neisseria gonorrhoeae MS11	403		cell wall macromolecule catabolic process	IPR011055; IPR018392; IPR016047;
D1DHS3	D1DHS3_NEIGO	unreviewed	Integration host factor subunit alpha (IHF-alpha)	ihfA himA NGFG_00450	Neisseria gonorrhoeae MS11	100		DNA binding; DNA recombination; regulation of transcription, DNA-templated; regulation of translation; transcription, DNA-templated	IPR000119; IPR020816; IPR010992; IPR005684;
T2A2J6	T2A2J6_NEIGO	unreviewed	Opacity protein	NGFG_02432	Neisseria gonorrhoeae MS11	224		cell outer membrane; integral component of membrane; porin activity	IPR017690; IPR011250; IPR003394;
D1DFF2	D1DFF2_NEIGO	unreviewed	Uncharacterized protein	NGFG_01240	Neisseria gonorrhoeae MS11	186			IPR007372;
D1DIG4	D1DIG4_NEIGO	unreviewed	Uncharacterized protein	NGFG_00691	Neisseria gonorrhoeae MS11	268			IPR019613;
D1DJY4	D1DJY4_NEIGO	unreviewed	Putrescine-binding periplasmic protein	NGFG_02061	Neisseria gonorrhoeae MS11	376	Periplasm.	periplasmic space; polyamine binding; polyamine transport	IPR001188;
D1DKZ7	D1DKZ7_NEIGO	unreviewed	Uncharacterized protein	NGFG_01883	Neisseria gonorrhoeae MS11	274
T2A382	T2A382_NEIGO	unreviewed	Multidrug resistance efflux pump membrane protein A	NGFG_02457	Neisseria gonorrhoeae MS11	384		membrane; transmembrane transport	IPR006143;
D1DG33	D1DG33_NEIGO	unreviewed	Lactate permease (LctP) family transporter	NGFG_01471	Neisseria gonorrhoeae MS11	528		integral component of plasma membrane; lactate transmembrane transporter activity	IPR003804;
D1DKW6	D1DKW6_NEIGO	unreviewed	Cytochrome c1	NGFG_01852	Neisseria gonorrhoeae MS11	262		electron carrier activity; heme binding; iron ion binding	IPR009056; IPR002326;
D1DK61	D1DK61_NEIGO	unreviewed	Outer membrane protein OmpU	NGFG_02138	Neisseria gonorrhoeae MS11	476			IPR007655; IPR013026; IPR011990;
D1DHI5	D1DHI5_NEIGO	unreviewed	MafB family adhesin protein	NGFG_00362	Neisseria gonorrhoeae MS11	628			IPR008106;
D1DFT7	D1DFT7_NEIGO	unreviewed	Uncharacterized protein	NGFG_01375	Neisseria gonorrhoeae MS11	225		cell outer membrane; integral component of membrane; plasma membrane	IPR008816; IPR006664; IPR006665;
D1DFC7	D1DFC7_NEIGO	unreviewed	30S ribosomal protein S6	rpsF NGFG_01215	Neisseria gonorrhoeae MS11	122		rRNA binding; ribosome; structural constituent of ribosome; translation	IPR000529; IPR020815; IPR020814; IPR014717;
D1DJX1	D1DJX1_NEIGO	unreviewed	Imidazoleglycerol-phosphate dehydratase (EC 4.2.1.19)	NGFG_02048	Neisseria gonorrhoeae MS11	303	Cytoplasm.	cytoplasm; histidine biosynthetic process; imidazoleglycerol-phosphate dehydratase activity	IPR000807; IPR020565; IPR020568;
D1DK89	D1DK89_NEIGO	unreviewed	Thiol:disulfide interchange protein DsbA	NGFG_01628	Neisseria gonorrhoeae MS11	232		cell redox homeostasis	IPR023205; IPR012336; IPR017937;
D1DHK9	D1DHK9_NEIGO	unreviewed	Uncharacterized protein	NGFG_00386	Neisseria gonorrhoeae MS11	203			IPR014861;
D1DKW8	D1DKW8_NEIGO	unreviewed	Ubiquinol-cytochrome c reductase iron-sulfur subunit (EC 1.10.2.2)	NGFG_01854	Neisseria gonorrhoeae MS11	193		2 iron, 2 sulfur cluster binding; membrane; metal ion binding; ubiquinol-cytochrome-c reductase activity	IPR017941; IPR014349; IPR005805; IPR006311; IPR019470; IPR006317;
D1DL72	D1DL72_NEIGO	unreviewed	Glyceraldehyde-3-phosphate dehydrogenase	NGFG_01958	Neisseria gonorrhoeae MS11	334		NAD binding; NADP binding; glucose metabolic process; oxidoreductase activity, acting on the aldehyde or oxo group of donors, NAD or NADP as acceptor	IPR020831; IPR020830; IPR020829; IPR020828; IPR006424; IPR016040;
T2A392	T2A392_NEIGO	unreviewed	Opacity protein	NGFG_02467	Neisseria gonorrhoeae MS11	225		cell outer membrane; integral component of membrane; porin activity	IPR017690; IPR011250; IPR003394;
D1DKJ5	D1DKJ5_NEIGO	unreviewed	30S ribosomal protein S13	rpsM NGFG_01734	Neisseria gonorrhoeae MS11	120		rRNA binding; ribosome; structural constituent of ribosome; tRNA binding; translation	IPR027437; IPR001892; IPR010979; IPR019980; IPR018269;
D1DJT9	D1DJT9_NEIGO	unreviewed	CTP synthase (EC 6.3.4.2) (CTP synthetase) (UTP--ammonia ligase)	pyrG NGFG_02016	Neisseria gonorrhoeae MS11	544		'de novo' CTP biosynthetic process; ATP binding; CTP synthase activity; glutamine metabolic process	IPR004468; IPR017456; IPR017926; IPR027417;
D1DIN1	D1DIN1_NEIGO	unreviewed	Acetate kinase (EC 2.7.2.1) (Acetokinase)	ackA NGFG_00758	Neisseria gonorrhoeae MS11	398	Cytoplasm.	ATP binding; acetate kinase activity; acetyl-CoA biosynthetic process; cytoplasm; magnesium ion binding; organic acid metabolic process	IPR004372; IPR000890; IPR023865;
D1DHC8	D1DHC8_NEIGO	unreviewed	Zinc/manganese ABC transporter substrate-binding protein	NGFG_00305	Neisseria gonorrhoeae MS11	304		cell adhesion; metal ion binding; metal ion transport	IPR006129; IPR006128; IPR006127;
T2A431	T2A431_NEIGO	unreviewed	Pilin pilS2c1	NGFG_02484	Neisseria gonorrhoeae MS11	139		cell adhesion; pilus	IPR001082;
D1DGI7	D1DGI7_NEIGO	unreviewed	Pilin pilS1c456	NGFG_00014	Neisseria gonorrhoeae MS11	361		cell adhesion; pilus	IPR001082;
D1DG66	D1DG66_NEIGO	unreviewed	Na(+)-translocating NADH-quinone reductase subunit C (Na(+)-NQR subunit C) (Na(+)-translocating NQR subunit C) (EC 1.6.5.-) (NQR complex subunit C) (NQR-1 subunit C)	nqrC NGFG_01504	Neisseria gonorrhoeae MS11	258	Cell membrane.	FMN binding; Gram-negative-bacterium-type cell wall; integral component of membrane; oxidoreductase activity, acting on NAD(P)H, quinone or similar compound as acceptor; plasma membrane; sodium ion transport	IPR007329; IPR010204;
D1DFZ9	D1DFZ9_NEIGO	unreviewed	Phospholipase A1	NGFG_01437	Neisseria gonorrhoeae MS11	379		lipid metabolic process; membrane; phospholipase activity	IPR003187;
D1DKR3	D1DKR3_NEIGO	unreviewed	Lipoprotein	NGFG_01802	Neisseria gonorrhoeae MS11	338			IPR009739;
D1DK51	D1DK51_NEIGO	unreviewed	UbiH/UbiF/VisC/COQ6 family ubiquinone biosynthesis hydroxylase	NGFG_02128	Neisseria gonorrhoeae MS11	461		flavin adenine dinucleotide binding; oxidoreductase activity, acting on paired donors, with incorporation or reduction of molecular oxygen, NAD(P)H as one donor, and incorporation of one atom of oxygen; ubiquinone biosynthetic process	IPR002938; IPR003042; IPR010971;
D1DFE5	D1DFE5_NEIGO	unreviewed	Dihydrolipoyllysine-residue acetyltransferase	NGFG_01233	Neisseria gonorrhoeae MS11	520		dihydrolipoyllysine-residue acetyltransferase activity; glycolytic process; pyruvate dehydrogenase complex	IPR003016; IPR001078; IPR006256; IPR000089; IPR023213; IPR004167; IPR011053;
D1DGV4	D1DGV4_NEIGO	unreviewed	Membrane protein insertase YidC (Foldase YidC) (Membrane integrase YidC) (Membrane protein YidC)	yidC NGFG_00131	Neisseria gonorrhoeae MS11	545	Cell membrane; Multi-pass membrane protein.	integral component of membrane; plasma membrane; protein insertion into membrane; protein transport	IPR019998; IPR028055; IPR028053; IPR001708;
D1DJM7	D1DJM7_NEIGO	unreviewed	Uncharacterized protein	NGFG_02175	Neisseria gonorrhoeae MS11	287			IPR011652;
D1DJ97	D1DJ97_NEIGO	unreviewed	Uncharacterized protein	NGFG_00974	Neisseria gonorrhoeae MS11	204
D1DIT4	D1DIT4_NEIGO	unreviewed	Succinate dehydrogenase, flavoprotein subunit	NGFG_00811	Neisseria gonorrhoeae MS11	587		electron transport chain; flavin adenine dinucleotide binding; oxidoreductase activity, acting on the CH-CH group of donors; tricarboxylic acid cycle	IPR003953; IPR003952; IPR015939; IPR027477; IPR011281; IPR014006;
D1DKU2	D1DKU2_NEIGO	unreviewed	Uncharacterized protein	NGFG_01828	Neisseria gonorrhoeae MS11	326		hydrolase activity	IPR023214; IPR006439; IPR010237;
D1DFB7	D1DFB7_NEIGO	unreviewed	Trigger factor (TF) (EC 5.2.1.8) (PPIase)	tig NGFG_01205	Neisseria gonorrhoeae MS11	436	Cytoplasm.	cell cycle; cell division; cytoplasm; peptidyl-prolyl cis-trans isomerase activity; protein folding; protein transport	IPR001179; IPR005215; IPR008880; IPR008881; IPR027304;
D1DI83	D1DI83_NEIGO	unreviewed	Prepilin-type N-terminal cleavage/methylation domain-containing protein	NGFG_00610	Neisseria gonorrhoeae MS11	162		protein secretion by the type II secretion system; protein transporter activity; type II protein secretion system complex	IPR000983; IPR012902; IPR025922;
D1DGB7	D1DGB7_NEIGO	unreviewed	Hydrophobe/amphiphile efflux-1 (HAE1) family RND transporter	NGFG_01555	Neisseria gonorrhoeae MS11	1067		integral component of membrane; transporter activity	IPR027463; IPR001036; IPR004764;
D1DFF6	D1DFF6_NEIGO	unreviewed	Uncharacterized protein	NGFG_01244	Neisseria gonorrhoeae MS11	327
D1DHE4	D1DHE4_NEIGO	unreviewed	Sec-independent protein translocase protein TatA	tatA NGFG_00321	Neisseria gonorrhoeae MS11	67	Cell membrane; Single-pass membrane protein.	TAT protein transport complex; integral component of plasma membrane; protein secretion; protein transmembrane transporter activity; protein transport by the Tat complex	IPR003369; IPR006312;
D1DFZ7	D1DFZ7_NEIGO	unreviewed	Putrescine-binding periplasmic protein	NGFG_01435	Neisseria gonorrhoeae MS11	380	Periplasm.	periplasmic space; polyamine binding; polyamine transport	IPR001188;
D1DGF3	D1DGF3_NEIGO	unreviewed	Cytochrome c	NGFG_01591	Neisseria gonorrhoeae MS11	279		electron carrier activity; heme binding; iron ion binding	IPR009056; IPR002323;
D1DHJ6	D1DHJ6_NEIGO	unreviewed	Cell division protein ZipA	NGFG_00373	Neisseria gonorrhoeae MS11	428	Cell inner membrane; Single-pass type I membrane protein.	barrier septum assembly; integral component of membrane; plasma membrane	IPR007449;
D1DHR3	D1DHR3_NEIGO	unreviewed	Threonine--tRNA ligase (EC 6.1.1.3) (Threonyl-tRNA synthetase)	thrS NGFG_00440	Neisseria gonorrhoeae MS11	637	Cytoplasm.	ATP binding; cytoplasm; metal ion binding; threonine-tRNA ligase activity; threonyl-tRNA aminoacylation	IPR002314; IPR006195; IPR004154; IPR012675; IPR004095; IPR012676; IPR002320; IPR018163; IPR012947;
D1DHY5	D1DHY5_NEIGO	unreviewed	Heme biosynthesis-associated protein HemY	NGFG_00512	Neisseria gonorrhoeae MS11	405		heme metabolic process; membrane	IPR005254; IPR010817; IPR011990;
D1DL91	D1DL91_NEIGO	unreviewed	Type IV pilus assembly protein PilC	NGFG_01977	Neisseria gonorrhoeae MS11	998			IPR008707;
D1DIK8	D1DIK8_NEIGO	unreviewed	Protein translocase subunit SecA	secA NGFG_00735	Neisseria gonorrhoeae MS11	916	Cell membrane; Peripheral membrane protein; Cytoplasmic side. Cytoplasm.	ATP binding; cytoplasm; intracellular protein transmembrane transport; metal ion binding; plasma membrane; protein import; protein targeting	IPR027417; IPR004027; IPR000185; IPR020937; IPR011115; IPR014018; IPR011130; IPR011116;
T2A362	T2A362_NEIGO	unreviewed	Pilin pilS7	NGFG_02431	Neisseria gonorrhoeae MS11	108		cell adhesion; pilus	IPR001082;
D1DGB6	D1DGB6_NEIGO	unreviewed	Membrane fusion protein mtrC	NGFG_01554	Neisseria gonorrhoeae MS11	412		membrane; transmembrane transport	IPR006143;
D1DKF8	D1DKF8_NEIGO	unreviewed	Ribonuclease E (RNase E) (EC 3.1.26.12)	rne NGFG_01697	Neisseria gonorrhoeae MS11	919	Cytoplasm. Cell inner membrane; Peripheral membrane protein; Cytoplasmic side.	RNA binding; cytoplasm; cytoplasmic side of plasma membrane; endoribonuclease activity; mRNA catabolic process; magnesium ion binding; rRNA processing; ribonuclease E activity; tRNA processing; zinc ion binding	IPR012340; IPR003029; IPR019307; IPR022967; IPR028878; IPR004659;
D1DKR4	D1DKR4_NEIGO	unreviewed	Sodium/glutamate symporter	NGFG_01803	Neisseria gonorrhoeae MS11	404		glutamate:sodium symporter activity; integral component of membrane	IPR004445;
T2A3C9	T2A3C9_NEIGO	unreviewed	Opacity protein	NGFG_02258	Neisseria gonorrhoeae MS11	228		cell outer membrane; integral component of membrane; porin activity	IPR006315; IPR017690; IPR011250; IPR003394;
D1DIL2	D1DIL2_NEIGO	unreviewed	Outer membrane protein H.8	NGFG_00739	Neisseria gonorrhoeae MS11	183		copper ion binding; electron carrier activity	IPR014068; IPR000923; IPR028871; IPR008972;
D1DL93	D1DL93_NEIGO	unreviewed	Twitching motility protein	NGFG_01979	Neisseria gonorrhoeae MS11	408		ATP binding; nucleoside-triphosphatase activity; transport	IPR003593; IPR027417; IPR006321; IPR001482;
D1DGR6	D1DGR6_NEIGO	unreviewed	Lipoprotein	NGFG_00093	Neisseria gonorrhoeae MS11	288			IPR004872;
D1DHU7	D1DHU7_NEIGO	unreviewed	RNA-binding protein Hfq	hfq NGFG_00474	Neisseria gonorrhoeae MS11	97		RNA binding; regulation of transcription, DNA-templated; response to stress	IPR005001; IPR010920; IPR001163;
D1DG17	D1DG17_NEIGO	unreviewed	NAD(P) transhydrogenase subunit beta (EC 1.6.1.2) (Nicotinamide nucleotide transhydrogenase subunit beta)	NGFG_01455	Neisseria gonorrhoeae MS11	461		NAD(P)+ transhydrogenase (AB-specific) activity; NADP binding; integral component of membrane; plasma membrane	IPR012136;
D1DGP5	D1DGP5_NEIGO	unreviewed	ABC transporter substrate-binding protein virulence factor Mce	NGFG_00072	Neisseria gonorrhoeae MS11	164			IPR003399;
D1DH58	D1DH58_NEIGO	unreviewed	Type IV pilus assembly protein PilN	NGFG_00235	Neisseria gonorrhoeae MS11	199			IPR007813;
D1DKK5	D1DKK5_NEIGO	unreviewed	50S ribosomal protein L5	rplE NGFG_01744	Neisseria gonorrhoeae MS11	179		rRNA binding; ribosome; structural constituent of ribosome; tRNA binding; translation	IPR002132; IPR020930; IPR020929; IPR022803;
D1DK75	D1DK75_NEIGO	unreviewed	Uncharacterized protein	NGFG_01614	Neisseria gonorrhoeae MS11	151			IPR006311;
D1DKT8	D1DKT8_NEIGO	unreviewed	Peptide methionine sulfoxide reductase msrA/msrB	NGFG_01824	Neisseria gonorrhoeae MS11	522		peptide-methionine (R)-S-oxide reductase activity; peptide-methionine (S)-S-oxide reductase activity; protein repair; response to oxidative stress	IPR028427; IPR002569; IPR002579; IPR011057; IPR013740; IPR012336;
D1DKV4	D1DKV4_NEIGO	unreviewed	Methionine--tRNA ligase (EC 6.1.1.10) (Methionyl-tRNA synthetase)	metG NGFG_01840	Neisseria gonorrhoeae MS11	684	Cytoplasm.	ATP binding; cytoplasm; metal ion binding; methionine-tRNA ligase activity; methionyl-tRNA aminoacylation; tRNA binding	IPR001412; IPR004495; IPR023458; IPR014758; IPR015413; IPR012340; IPR014729; IPR002547; IPR009080; IPR013155;
D1DG41	D1DG41_NEIGO	unreviewed	Prepilin-type N-terminal cleavage/methylation domain-containing protein	NGFG_01479	Neisseria gonorrhoeae MS11	129			IPR012902;
D1DGZ2	D1DGZ2_NEIGO	unreviewed	Fructose-bisphosphate aldolase	NGFG_00169	Neisseria gonorrhoeae MS11	354		fructose-bisphosphate aldolase activity; glycolytic process; zinc ion binding	IPR013785; IPR006412; IPR000771;
D1DHF1	D1DHF1_NEIGO	unreviewed	Protein-export membrane protein SecF	secF NGFG_00328	Neisseria gonorrhoeae MS11	311	Cell membrane; Multi-pass membrane protein.	P-P-bond-hydrolysis-driven protein transmembrane transporter activity; integral component of membrane; intracellular; intracellular protein transmembrane transport; plasma membrane; protein targeting; protein transport by the Sec complex	IPR022813; IPR022645; IPR022646; IPR005665;
D1DKJ3	D1DKJ3_NEIGO	unreviewed	30S ribosomal protein S4	rpsD NGFG_01732	Neisseria gonorrhoeae MS11	206		rRNA binding; small ribosomal subunit; structural constituent of ribosome; translation	IPR022801; IPR001912; IPR005709; IPR018079; IPR002942;
D1DK81	D1DK81_NEIGO	unreviewed	Uncharacterized protein	NGFG_01620	Neisseria gonorrhoeae MS11	204			IPR007486;
D1DGS5	D1DGS5_NEIGO	unreviewed	ATP synthase subunit alpha (EC 3.6.3.14) (ATP synthase F1 sector subunit alpha) (F-ATPase subunit alpha)	atpA NGFG_00102	Neisseria gonorrhoeae MS11	515	Cell membrane; Peripheral membrane protein.	ATP binding; ATP hydrolysis coupled proton transport; plasma membrane; plasma membrane ATP synthesis coupled proton transport; proton-transporting ATP synthase activity, rotational mechanism; proton-transporting ATP synthase complex, catalytic core F(1); proton-transporting ATPase activity, rotational mechanism	IPR020003; IPR023366; IPR005294; IPR000793; IPR000194; IPR004100; IPR027417;
D1DL97	D1DL97_NEIGO	unreviewed	Pyrroline-5-carboxylate reductase	NGFG_01983	Neisseria gonorrhoeae MS11	263		proline biosynthetic process; pyrroline-5-carboxylate reductase activity	IPR008927; IPR016040; IPR028939; IPR000304;
D1DGC3	D1DGC3_NEIGO	unreviewed	Glutamate dehydrogenase	NGFG_01561	Neisseria gonorrhoeae MS11	444		cellular amino acid metabolic process; oxidoreductase activity, acting on the CH-NH2 group of donors, NAD or NADP as acceptor	IPR006095; IPR006096; IPR006097; IPR014362; IPR016040;
D1DJR6	D1DJR6_NEIGO	unreviewed	Magnesium transporter	NGFG_01993	Neisseria gonorrhoeae MS11	484		adenyl nucleotide binding; magnesium ion transmembrane transporter activity; membrane	IPR000644; IPR006668; IPR006669; IPR006667;
D1DHE7	D1DHE7_NEIGO	unreviewed	Zinc-binding alcohol dehydrogenase	NGFG_00324	Neisseria gonorrhoeae MS11	354		oxidoreductase activity; zinc ion binding	IPR013149; IPR013154; IPR002085; IPR002328; IPR011032; IPR016040;
D1DK08	D1DK08_NEIGO	unreviewed	Histidine-binding protein	NGFG_02085	Neisseria gonorrhoeae MS11	268		outer membrane-bounded periplasmic space; transporter activity	IPR001638; IPR018313;
D1DHZ6	D1DHZ6_NEIGO	unreviewed	Amino acid ABC transporter substrate-binding protein	NGFG_00523	Neisseria gonorrhoeae MS11	274		outer membrane-bounded periplasmic space; transporter activity	IPR001638; IPR018313;
D1DIU7	D1DIU7_NEIGO	unreviewed	Uncharacterized protein	NGFG_00824	Neisseria gonorrhoeae MS11	233			IPR003741; IPR024185;
D1DIT9	D1DIT9_NEIGO	unreviewed	2-oxoglutarate dehydrogenase E2 component (Dihydrolipoamide succinyltransferase)	NGFG_00816	Neisseria gonorrhoeae MS11	393		dihydrolipoyllysine-residue succinyltransferase activity; oxoglutarate dehydrogenase complex; tricarboxylic acid cycle	IPR003016; IPR001078; IPR000089; IPR023213; IPR004167; IPR011053; IPR006255;
D1DFA2	D1DFA2_NEIGO	unreviewed	Membrane-bound lytic murein transglycosylase D	NGFG_01190	Neisseria gonorrhoeae MS11	658		cell wall macromolecule catabolic process	IPR018392; IPR023346; IPR008258;
D1DHP8	D1DHP8_NEIGO	unreviewed	Uncharacterized protein	NGFG_00425	Neisseria gonorrhoeae MS11	139
D1DJW8	D1DJW8_NEIGO	unreviewed	Uncharacterized protein	NGFG_02045	Neisseria gonorrhoeae MS11	295			IPR000305;
D1DFQ1	D1DFQ1_NEIGO	unreviewed	Uncharacterized protein	NGFG_01339	Neisseria gonorrhoeae MS11	377
D1DEY6	D1DEY6_NEIGO	unreviewed	Glucokinase (EC 2.7.1.2) (Glucose kinase)	glk NGFG_01074	Neisseria gonorrhoeae MS11	328	Cytoplasm.	ATP binding; cytoplasm; glucokinase activity; glycolytic process	IPR003836;
D1DJS8	D1DJS8_NEIGO	unreviewed	Sulfatase	NGFG_02005	Neisseria gonorrhoeae MS11	524		sulfuric ester hydrolase activity	IPR017849; IPR017850; IPR000917;
D1DKC6	D1DKC6_NEIGO	unreviewed	Uncharacterized protein	NGFG_01665	Neisseria gonorrhoeae MS11	495		catalytic activity	IPR001045;
D1DGF9	D1DGF9_NEIGO	unreviewed	Paraquat-inducible protein B	NGFG_01597	Neisseria gonorrhoeae MS11	553			IPR003399;
D1DJC9	D1DJC9_NEIGO	unreviewed	Uncharacterized protein	NGFG_01006	Neisseria gonorrhoeae MS11	170
D1DL54	D1DL54_NEIGO	unreviewed	Phospholipase patatin family protein	NGFG_01940	Neisseria gonorrhoeae MS11	297		lipid metabolic process	IPR016035; IPR002641;
D1DG40	D1DG40_NEIGO	unreviewed	Alcohol dehydrogenase, propanol-preferring	NGFG_01478	Neisseria gonorrhoeae MS11	348		oxidoreductase activity; zinc ion binding	IPR013149; IPR013154; IPR002085; IPR002328; IPR011032; IPR016040;
D1DKL2	D1DKL2_NEIGO	unreviewed	50S ribosomal protein L22	rplV NGFG_01751	Neisseria gonorrhoeae MS11	109		large ribosomal subunit; rRNA binding; structural constituent of ribosome; translation	IPR001063; IPR018260; IPR005727;
D1DFR9	D1DFR9_NEIGO	unreviewed	Outer membrane protein P.III	NGFG_01357	Neisseria gonorrhoeae MS11	236		cell outer membrane; integral component of membrane; plasma membrane	IPR006664; IPR006690; IPR006665;
D1DH10	D1DH10_NEIGO	unreviewed	Carbamoyl-phosphate synthase small chain (EC 6.3.5.5) (Carbamoyl-phosphate synthetase glutamine chain)	carA NGFG_00187	Neisseria gonorrhoeae MS11	377		'de novo' UMP biosynthetic process; ATP binding; arginine biosynthetic process; carbamoyl phosphate biosynthetic process; carbamoyl-phosphate synthase (glutamine-hydrolyzing) activity; glutamine catabolic process	IPR006274; IPR002474; IPR017926;
D1DH60	D1DH60_NEIGO	unreviewed	Penicillin-binding protein 1A	NGFG_00237	Neisseria gonorrhoeae MS11	798		penicillin binding; peptidase activity; peptidoglycan biosynthetic process; response to antibiotic; transferase activity, transferring pentosyl groups	IPR012338; IPR001264; IPR023346; IPR012340; IPR011816; IPR001460;
D1DGS4	D1DGS4_NEIGO	unreviewed	ATP synthase subunit delta (ATP synthase F(1) sector subunit delta) (F-type ATPase subunit delta)	atpH NGFG_00101	Neisseria gonorrhoeae MS11	177	Cell membrane; Peripheral membrane protein.	plasma membrane; plasma membrane ATP synthesis coupled proton transport; proton-transporting ATP synthase activity, rotational mechanism; proton-transporting ATP synthase complex, catalytic core F(1)	IPR000711; IPR020781; IPR026015;
D1DFE3	D1DFE3_NEIGO	unreviewed	Proline--tRNA ligase (EC 6.1.1.15) (Prolyl-tRNA synthetase)	proS NGFG_01231	Neisseria gonorrhoeae MS11	570	Cytoplasm.	ATP binding; aminoacyl-tRNA editing activity; cytoplasm; proline-tRNA ligase activity; prolyl-tRNA aminoacylation	IPR002314; IPR006195; IPR004154; IPR002316; IPR004500; IPR023717; IPR007214;
D1DI47	D1DI47_NEIGO	unreviewed	Uncharacterized protein	NGFG_00574	Neisseria gonorrhoeae MS11	234			IPR007497;
D1DKE5	D1DKE5_NEIGO	unreviewed	DNA gyrase subunit B (EC 5.99.1.3)	gyrB NGFG_01684	Neisseria gonorrhoeae MS11	796	Cytoplasm.	ATP binding; DNA binding; DNA topoisomerase type II (ATP-hydrolyzing) activity; DNA topological change; DNA-dependent DNA replication; chromosome; cytoplasm; magnesium ion binding	IPR002288; IPR011557; IPR003594; IPR020568; IPR014721; IPR001241; IPR013506; IPR013759; IPR013760; IPR018522; IPR006171;
D1DKH6	D1DKH6_NEIGO	unreviewed	Outer membrane protein assembly factor BamA	bamA NGFG_01715	Neisseria gonorrhoeae MS11	792	Cell outer membrane.	Gram-negative-bacterium-type cell outer membrane assembly; cell outer membrane; integral component of membrane; plasma membrane; protein insertion into membrane	IPR000184; IPR023707; IPR010827;
D1DIF2	D1DIF2_NEIGO	unreviewed	Fimbrial assembly protein FimB	NGFG_00679	Neisseria gonorrhoeae MS11	261
D1DJ16	D1DJ16_NEIGO	unreviewed	Uncharacterized protein	NGFG_00893	Neisseria gonorrhoeae MS11	95
D1DFA6	D1DFA6_NEIGO	unreviewed	30S ribosomal protein S1	NGFG_01194	Neisseria gonorrhoeae MS11	561		RNA binding; ribosome; structural constituent of ribosome; translation	IPR012340; IPR003029; IPR000110; IPR022967;
T2A3A7	T2A3A7_NEIGO	unreviewed	Pilin pilS1c3	NGFG_02487	Neisseria gonorrhoeae MS11	112		cell adhesion; pilus	IPR001082;
D1DHE9	D1DHE9_NEIGO	unreviewed	Preprotein translocase, YajC subunit	NGFG_00326	Neisseria gonorrhoeae MS11	88			IPR003849;
D1DID0	D1DID0_NEIGO	unreviewed	Cytochrome c	NGFG_00657	Neisseria gonorrhoeae MS11	152		electron carrier activity; electron transport chain; heme binding; iron ion binding; periplasmic space	IPR010980; IPR002321; IPR012127; IPR015984;
D1DHP1	D1DHP1_NEIGO	unreviewed	Outer membrane protein assembly factor BamD	bamD NGFG_00418	Neisseria gonorrhoeae MS11	256	Cell outer membrane.	Gram-negative-bacterium-type cell outer membrane assembly; cell outer membrane; protein insertion into membrane	IPR017689; IPR011990;
D1DIZ3	D1DIZ3_NEIGO	unreviewed	Uncharacterized protein	NGFG_00870	Neisseria gonorrhoeae MS11	110
D1DKS6	D1DKS6_NEIGO	unreviewed	Chaperone protein DnaJ	dnaJ NGFG_01815	Neisseria gonorrhoeae MS11	373	Cytoplasm.	ATP binding; DNA replication; cytoplasm; protein folding; response to heat; zinc ion binding	IPR012724; IPR002939; IPR001623; IPR018253; IPR008971; IPR001305;
